# Supplementary material
Source: publisher figshare collection journal article supplement (https://tandf.figshare.com/articles/dataset/_/10271486)
Supplement: Supplementary file 1 [file 2]

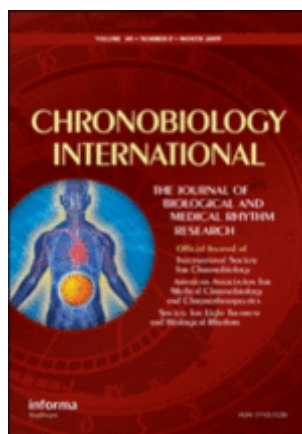

**Evening chronotype, late weekend sleep times and social jetlag as possible causes of sleep curtailment after maintaining perennial DST: ain't they as black as they are painted?**

|                               |                                                                                                                                                                                                                                                                     |
|-------------------------------|---------------------------------------------------------------------------------------------------------------------------------------------------------------------------------------------------------------------------------------------------------------------|
| Journal:                      | <i>Chronobiology International</i>                                                                                                                                                                                                                                  |
| Manuscript ID                 | LCBI-2019-0228.R1                                                                                                                                                                                                                                                   |
| Manuscript Type:              | Original Reports                                                                                                                                                                                                                                                    |
| Date Submitted by the Author: | 17-Oct-2019                                                                                                                                                                                                                                                         |
| Complete List of Authors:     | Putilov, Arcady; Research Institute for Molecular Biology and Biophysics, ; Poluektov, Michael; I.M. Sechenov 1-st Moscow State Medical University Dorokhov , Vladimir; Institute of Higher Nervous Activity and Neurophysiology of the Russian Academy of Sciences |
| Keywords:                     | evening type, morning type, sleep timing, sleep duration, sleep curtailment, sleep-wake regulation, two-process model, simulation                                                                                                                                   |
|                               |                                                                                                                                                                                                                                                                     |

SCHOLARONE™  
Manuscripts

**Evening chronotype, late weekend sleep times and social jetlag as possible causes of sleep curtailment after maintaining perennial DST: ain't they as black as they are painted?**

Arcady A. Putilov<sup>1\*</sup>, Michael G. Poluektov<sup>2</sup>, Vladimir B. Dorokhov<sup>1</sup>

<sup>1</sup> Laboratory of Sleep/Wake Neurobiology, the Institute of Higher Nervous Activity and Neurophysiology of the Russian Academy of Sciences, Moscow, Russia

<sup>2</sup> Department of Normal Physiology, Pirogov Russian National Research Medical University, Moscow, Russia

\* Dr. Arcady Putilov, 11, Nipkowstr., 12489 Berlin, Germany, phone/fax: 0049-30-53674643; e-mail address: putilov@ngs.ru; ORCID: 0000-0003-2779-9046

Short title: Estimation of sleep losses from bed- and risetimes

Disclosure statement

No potential conflict of interest was reported by the authors.

Funding

AAP and VBD were supported by the Russian Foundation for Basic Research (grant numbers 19-013-00424 and 17-36-00025-OGN-A1). MGP was supported by the "Russian Academic Excellence Project 5-100".

Ethics

The study reported in papers from which samples with sleep times were collected have been carried out in accordance with The Code of Ethics of the World Medical Association (Declaration of Helsinki) for experiments involving humans.

## Abstract

People sleep less in response to setting social clocks earlier relative to the sun clocks. We proposed here a model-based approach for estimating sleep loss as the difference between weekend and weekday risetimes divided on the difference between weekend risetime and weekday bedtime. We compared this approach with a traditional approach to estimating sleep curtailment as the difference in weekly average sleep duration in two conditions. Weekday and weekend sleep times reported for 320 samples provided possibility of testing whether evening types with later weekend sleep times and larger social jetlag differ from morning types with earlier weekend sleep times and smaller social jetlag on amount of sleep lost 1) throughout the week and 2) in response to an advance of weekday wakeups, for instance, after the expected installation of perennial Daylight Saving Time (DST). We found that 1) an amount of sleep lost due to advancing shift of weekday wakeups depends upon neither chronotype nor weekend sleep times nor social jetlag, 2) a very large amount of sleep is usually lost by evening types with later weekend sleep times and larger social jetlag, and 3) an essential sleep loss is caused by our usual work/school schedules, even in morning types with early weekend sleep times and small social jetlag. As compared to such permanent sleep losses experienced by any types, an additional loss due to switching from Standard Time (ST) to perennial DST are expected to be relatively small. We also found that the traditional way of calculation of sleep curtailment leads to paradoxical conclusions, such as 1) sleep loss is larger when social jetlag is smaller, not larger, 2) sleep loss is larger when weekend sleep times are earlier, not later, 3) despite 1-h difference between two student samples in weekday wakeups, their sleep losses can be identical.

**Key words:** evening type; morning type; sleep timing; sleep duration; sleep curtailment; sleep-wake regulation; two-process model; simulation

**Introduction**

People tend to sleep less when social clocks are set earlier relative to the sun clocks. Recently, Giuntella & Mazzonna (2019) demonstrated that employed people living on the late sunset side of a time zone border slept, on average, 19 fewer minutes than employed people living on the opposite side of the border (in neighboring US counties). Health index dropped by 0.3 standard deviations when people were living on the late sunset side of the border compared to the index of people living on the early sunset side (Giuntella & Mazzonna, 2019). Gu et al. (2017) reported that risk for total and many specific cancers increased from the east to the west in a time zone and VoPham et al. (2018) found that an increase in longitude moving east to west within a time zone significantly increased the risk of developing hepatocellular carcinoma. Moreover, the results presented online by Jagnani (2019) indicated that, in near equatorial countries, later sunset times are associated with fewer hours of sleep and poorer academic performance.

The occurring twice a year switches between Daylight Saving Time (DST, or ‘summertime’) and Standard Time (ST, or ‘wintertime’) are expected to be soon ended in the EU and several states of the USA. Would clocks be set in a way that does not make people sleep less year-round? Chronobiologists and sleep researchers are alarming about the negative effects on sleep and health of maintaining perennial DST as compared to the effects from installing perennial ST with noon occurring when the sun is overhead. Several international chronobiological and sleep societies insisted that, after ending the clock changes twice a year, the best choice for EU, California and any other places around the world would be to set social clocks to year round ST (EBRS, 2019; ESRS, 2019; Roenneberg et al., 2019b; Skeldon & Dijk, 2019; SRBR, 2019; Watson, 2019). However, only one third of several million respondents voted for setting year-round “winter time”, whereas more than a half of the respondents voted for constant “summer time” in an EU public international consultation (European Commission, 2018).

One of possible explanations of such amazing choice of the majority of respondents (e.g., Roenneberg et al., 2019a) suggests simple misunderstanding around the terms “winter time” and “summer time”. They might be associated with a shorter natural daylight interval during “winter time” and a longer daylight interval during “summer time”, while, in fact, the switching between DST and ST has nothing to do with the seasonal variation in photoperiod. If this explanation is correct, then one way of challenging the dominated public opinion would be to estimate the amount of sleep that is expected to be lost due to setting social clocks earlier relative to the sun and biological clocks.

Wittmann et al. (2006) introduced the term “social jetlag” to determine a misalignment between social and biological clocks and proposed to quantify it by calculation of a difference between when a person wakes up and goes to sleep on free days and when he/she wakes up and goes to sleep for work/school days. They also suggested that this kind of misalignment would be most pronounced in “late chronotypes” (or, in other terms, E[vening]-types as opposed to M[orning]-types) “who substantially have to readjust their temporal habits to social demands, i.e., having to get up early without being able to advance their circadianly controlled sleep-onset” (Wittmann et al., 2006). In the mentioned above report of Giuntella & Mazzonna (2019), the effects of 1-h difference in sunset time were larger among individuals with early working schedules and children of school age. Therefore, individual chronobiological differences between people as well as the differences in the extent of misalignment between their biological clocks and social clocks would be taken into account in evaluations of sleep curtailment caused by setting social clocks earlier relative to the sun and biological clocks. Individual variation in vulnerability to sleep loss would, in particular, predict that such a setting will be favoring exclusively early chronotypes thus ignoring the negative consequences for sleep and health of late chronotypes.

Here, we suggested that it is necessary to replace a traditional approach to estimation of sleep curtailment from weekday and weekend sleep times in two conditions by a new approach

and we illustrated such necessity by comparing the estimates of sleep curtailment in samples with distinct (M- and E-) chronotypes, earlier and later sleep timing on free days, smaller and larger social jetlag, and later and earlier weekday wakeups. When the results of applying the traditional and new approaches are compared, what would be the answers to such questions as: Does early chronotype or early weekend sleep times or small social jetlag let people 1) sleep more and 2) lose fewer minutes of sleep after a shift from later to earlier wakeups, in particular, due to the expected installation of perennial DST? The results of applying the two approaches were illustrated by the examination of the following two hypotheses:

E-types (with later sleep timing on free days and larger social jetlag) compared to M-types (with earlier sleep timing on free days and smaller social jetlag)

- 1) sleep less throughout a 7-day week consisting of 5 working/school days and two free days, and
- 2) will lose even more sleep when responding to earlier weekday wakeups, for example, after installation of perennial DST.

**Methods**

**Samples**

Bed- and Risetimes on weekdays and weekends (or, in general, free days) were collected from the journal papers. Sleep times for approximately a half of the analyzed here samples were previously used as an input to the model of sleep-wake regulating processes to simulate weekday and weekend time courses of Slow-Wave Activity (SWA), an electroencephalographic marker of these processes (Putilov, Verevkin, 2018; Putilov et al., 2019; Figure 1).

Since sleep times dramatically vary with age (i.e., early chronotypes are mostly children and people over 50, while late chronotypes are mostly adolescents and young adults), we enlarged this dataset to 320 samples by searching for the new samples mostly in most recent publications (years 2018 and 2019). Such increase in size of the whole collected dataset provided

a possibility of further subdivision of each of 8 age subsets into, at least, two smaller subsets differed in either sleep timing or social jetlag or weekday wakeups. The sizes of such age subsets are reported in Supplementary 1 in the first two tables, Tables S1 and S2 (Supplementary Tables and Figures). Moreover, Supplementary 2 contains the list 320 samples with sleep times that were either added more recently for the present analysis or were previously used for simulation (see also this simulation in Supplementary 3).

We applied subdivision of the whole set of samples into two subsets in accord with social jetlag, sleep phase, and weekday wakeups. Additionally, we arbitrarily subdivided the whole set of 320 samples in accord with year of publication (earlier than year 2014 or later), even-odd number of a sample (after ranging samples on mean age in a sample), country (Germany or other countries) and availability of data on distinct chronotypes (27 paired samples). Comparison of subsets obtained by such artificial subdivisions allowed the examination of replicability of sleep times calculated by averaging over samples collected without applying such selection criteria as a limited range of mean ages of study participants, sex ratio, employment/student status, years of education, outdoors light exposure, season of data collection, geographic location of the sample relative to the borders of time zone, longitude, latitude, and so on.

**Subdivision in accord with social jetlag and sleep phase**

The major subdivisions of the whole set of samples into two subsets of approximately similar size were performed in accord with smaller or larger social jetlag and in accord with earlier or later sleep phase.

First, we calculated three measures of social jetlag proposed for its quantitative evaluation (Jankowski, 2017; Roenneberg et al., 2007; Wittmann et al., 2006). However, the way of this calculation slightly differed from the originally proposed way (see also the limitation paragraph in Discussion). The main difference was in using bed- and risetimes instead of sleep onsets and offsets. Moreover, we need not calculate an absolute difference between weekday and weekend times because, due to averaging within each sample and then over the samples included in a

subset, the obtained mean times always indicated a delay rather than advance of sleep timing on weekends. Therefore, we termed such an estimate “time-lag” rather than “social jetlag” and calculated this lag as a weekend-weekday difference in either bedtime or risetime or midway from bedtime to risetime (either “bedtime-lag” or “risetime-lag” or “midway time-lag” abbreviated as either “BTL” or “RTL” or “MTL”, respectively; Tables 1 and S3).

Second, we utilized three measures for subdividing samples into subsets in accord with sleep phase. Following publications of Roenneberg et al. (2004, 2007, 2019a) we used a measure named “sleep corrected weekend midway time” ( $MT_{sc}$ ) that is a half of weekly average time in bed (see below) added to weekend bedtime. Again, it differed from the originally proposed “sleep corrected midpoint between sleep onset and offset” due to utilizing for calculations bedtime instead of sleep onset (Tables 1 and S1).

We also suggested another sleep phase measure that we need not calculate because this is risetime on weekends ( $RT_{we}$ ; Table 1). The reason for considering it as a measure of sleep phase was that, in accord with the simulation prediction, clock hour for wakeups seems to remain stable throughout the week in the case of spontaneous sleep termination, i.e., irrespective of bedtime that was always earlier on weekdays and always later on weekends (Figure 1).

In 26 publications, the estimates of bed- and risetimes were reported separately for 27 samples of M- and E-types. These data (27 of 320 samples) were included in the whole dataset after their averaging over chronotype (Table S4) while the pairs of samples of M- and E-types provided the 3<sup>rd</sup> subdivision into samples with earlier and later sleep phase named “Type”. However, only 27 paired samples were available for analysis of samples representing this third subdivision into earlier and late sleep phase (Tables 2 and S3).

In overall, the six subdivisions allowed the comparison of two subsets of samples differed on three indicators of sleep phase named “Type”, “ $RT_{we}$ ” and “ $MT_{sc}$ ” and on three measures of social jetlag named “RTL”, “MTL” and “BTL” (Table 1, left, 2, S5 and S6, left).



Subdivision in accord with earlier and later wakeups on weekdays

We also subdivided the whole sample into two subsets in accord with weekday wakeups. If mostly people's biology determines earlier sleep phase and smaller time-lag (six previous subdivisions), earlier weekday risetime (seventh subdivision) is expected to be mostly set by social clocks. Therefore, such a division into early and late risetime allowed the prediction of possible response to constant DST of people differed in sleep phase and social jetlag. We used this last subdivision, into earlier and later  $RT_{wd}$ , for testing whether samples with smaller time-lag and earlier chronotype differed from samples with larger time lag and later chronotype in responsiveness to earlier wakeups. In particular, such a response is expected after switching from ST to constant DST (the subsets with later and earlier  $RT_{wd}$ , respectively). Two subsets of samples with  $RT_{wd}$  being earlier and later than 7 a.m. were compared (Table 1, right).

Moreover, we further subdivided each of these two subsets into two smaller subsets with either earlier or later  $RT_{we}$ , either smaller or larger RTL, and so on (Tables S7-S11). Such 4-subset division was applied to all 8 ages for comparison of three measures of time-lag (RTL, MTL and BTL; Tables S7-S9). However, a similar comparison of two sleep phase measures ( $MT_{sc}$  and  $RT_{we}$ ; Tables S10 and S11) was limited to three of 8 ages due to the absence of either samples with earlier phase ( $MT_{sc} < 4$  a.m.) or samples with later phase ( $MT_{sc} > 4$  a.m.) among samples of 5 other ages.

### Comparison of paired samples

Additionally, several pairs of samples from separate studies allowed the examination of differences in sleep times in two conditions, either with different – earlier and later - weekday wakeups or during DST and ST (Tables S6 S12-S15). Therefore, we compared sleep times collected in such studies that can be considered “natural experiments” (see their list in Supplementary references of Supplementary 1).

A similar “natural experiment” was recognized in samples of two ages (16+ vs. 18+) in the collected dataset. Earlier age was mostly represented by high school students with early wakeups due to early school start time while older age was mostly represented by college/university students with much later weekday risetimes (Table S6, right).

Traditional approach to estimation of sleep reduction

A traditional approach to estimating sleep curtailment (e.g., caused by early wakeups) requires the calculation of a pair of weekly average sleep durations (e.g., for two conditions, with earlier and later weekday wakeups) and the following subtraction of one sleep duration from another. In other words, sleep curtailment can be, in particular, traditionally calculated as the difference between sleep durations after later weekday wakeups and sleep duration after earlier weekday wakeups.

To apply this traditional approach, we estimated the differences between rise- and bedtimes (“time in bed”) on weekdays and the differences between rise- and bedtimes (“time in bed”) on weekends. These times in bed were further used to calculate “weekly average time in bed” or, simply, “average” (in Tables 1-4 and S3-S20) that is 1/7<sup>th</sup> of the sum of time in bed for 5 weekdays and two weekends. This measure is an analog of weekly average sleep duration in social jetlag studies (e.g., Roenneberg et al., 2019a), but, again, we used for our calculations bed- and risetimes instead of self-reported times of sleep onset and offset.

Although such way of calculation of amount of sleep is very simple, its usefulness for estimation of sleep loss can be questioned by the results of simulation of weekday and weekend sleep times with a sleep-wake regulatory model (Putilov, Verevkin, 2018; Putilov et al., 2019; these simulations are described in more details in Supplementary). They, as we expected, confirmed the much earlier published results of simulation of experimental data on circadian variation in sleep duration (Åkerstedt & Gillberg, 1981) suggesting the sine-form 24-h modulation of sleep duration. The result explained the paradoxical observations of graduate decreasing rather than increasing in duration of sleep caused by delaying bedtimes due to

prolongation of wakefulness into night and early morning hours (Daan et al., 1984; Putilov, 1995). Such experimental and modelling results imply that sleep curtailment can be simply calculated as the difference between sleep durations in two conditions only in one case: when in both conditions sleep was initiated at the same circadian phase, but it was not (e.g., in the cases of sleep initiation on either weekdays or weekends either after earlier or after later weekday wakeups).

### Estimation of actual sleep loss

Therefore, to take into account the circadian modulation of sleep duration, we proposed another, model-based approach to calculation of sleep curtailment (e.g., sleep losses due to earlier weekday wakeups, including sleep losses caused by observing DST).

Weekend-weekday difference in time in bed was named “sleep shortening” or simply “shortening”. It equals to the difference between rise- and bedtime-lags as illustrated in Figure 1B. The simulation (Figures 1C and 2C) prompted a measure of sleep curtailment named “actual sleep loss” or, shortly, “sleep loss” that is calculated as the difference between rise- and bedtime-lags (shortening) expressed in percentage to the difference between weekend risetime ( $RT_{we}$ ) and weekday bedtime (Tables 1 and S3). In other words, shortening (weekend-weekday difference in time in bed) is expressed in percentage to time in bed expected in the case of naturally occurring sleep on Friday-Saturday night, when bedtime is initiated after the last working/sleep day, earlier than on weekend, to be spontaneously terminated already in the beginning of first free day, later than on weekday (Figure 1C).

To provide direct comparison of difference in the results of using two measures for estimation of sleep curtailment, the difference between two subsets of samples in weekly average time in bed was expressed in percentage to mean value obtained by averaging over these two weekly average times in bed (Tables 3 and S16-20). The final results of such comparison are given in Table 4.

List of time measures

In overall, the bed- and risetimes for weekdays and weekends were used to calculate the following time measures (Tables 1-3, S3-S20 and Figure 1):

Time in Bed (TiB), hours, = Risettime (RT), clock hours, - Bedtime (BT), clock hours, + 24 hours;

Weekday Time in Bed (TiB<sub>wd</sub>), hours, = Weekday Risettime (RT<sub>wd</sub>), clock hours, - Weekday Bedtime (BT<sub>wd</sub>), clock hours, + 24 hours;

Weekend Time in Bed (TiB<sub>we</sub>), hours, = Weekend Risettime (RT<sub>we</sub>), clock hours, - Weekend Bedtime (BT<sub>we</sub>), clock hours, + 24 hours;

Averaged time in bed (Average), hours, = (5 \* Weekday Time in Bed (TiB<sub>wd</sub>) + 2 \* Weekend Time in Bed (TiB<sub>we</sub>))/7, hours;

Midway Time (MT), clock hours, = Bedtime (BT), clock hours, + (Time in Bed (TiB))/2, hours, - 24 hours;

Weekday Midway Time (MT<sub>wd</sub>), clock hours, = Weekday Bedtime (BT<sub>wd</sub>), clock hours, + (Weekday Time in Bed (TiB<sub>wd</sub>))/2, hours, - 24 hours;

Weekend Midway Time (MT<sub>we</sub>), clock hours, = Weekend Bedtime (BT<sub>we</sub>), clock hours, + (Weekend Time in Bed (TiB<sub>we</sub>))/2, hours, - 24 hours;

Bedtime-lag (BTL), hours, = Weekend Bedtime (BT<sub>we</sub>), clock hours, – Weekday Bedtime (BT<sub>wd</sub>), clock hours;

Risettime-lag (RTL), hours, = Weekend Risettime (RT<sub>we</sub>), clock hours, – Weekday Risettime (RT<sub>wd</sub>), clock hours;

Midway Time-lag (MTL), hours, = Weekend Midway Time (MT<sub>we</sub>), clock hours, – Weekday Midway Time (MT<sub>wd</sub>), clock hours;

Sleep shortening (Shortening), hours, = Weekend Time in Bed ( $TiB_{we}$ ), hours, - Weekday Time in Bed ( $TiB_{wd}$ ), hours = Risettime-lag (RTL), hours, - Bedtime-lag (BTL), hours;

Actual sleep loss (Sleep loss), %, =  $100 * \text{Risettime-lag (RTL), hours,} / (\text{Weekend risetime (RT}_{we}), \text{clock hours,} - \text{Weekday bedtime (BT}_{wd}), \text{clock hours,} + 24 \text{ hours})$ ;

Difference in Sleep loss, %, = Difference in Sleep loss in one of two conditions, %, - Difference in Sleep loss in another condition, %;

Difference in Averaged time in bed, %, =  $100 * (\text{Average in one of two conditions, hours,} - \text{Average in another condition, hours}) / (\text{Average in one of two conditions, hours,} + \text{Average in another condition, hours})$ ;

Sleep Corrected weekend Midway Time ( $MT_{sc}$ ), clock hours, = Weekend Bedtime ( $BT_{we}$ ), clock hours, + Average/2, hours.

## Statistical analyses

All statistical analyses were performed with the Statistical Package for the Social Sciences (SPSS<sub>23</sub>, IBM, Armonk, NY, USA). The estimates derived from the collected sleep times were related one to another using the Pearson's coefficients of correlation (Figure 2 and Supplementary Figure S1). We performed two-way MANOVAs of 12 (collected and derived) sleep times (Tables 1, 2 and S2-S6) to test, for each of these 12 sleep times, significance of main effect of factor "Subset" (Tables 1, 2 and S2-S6) and its interaction with the second independent factor "Age" (see Results and Figures 3, S2-S4). We also run three-way MANOVAs of these 12 sleep times when each of two subsets was further subdivided into two smaller subsets to test significance of main effects of two "Subset" factors (Tables S7-S11) and interaction between them (see Results and Figure 4). For paired samples (e.g., M- and E-types), two-way repeated measure ANOVAs (rANOVAs) were performed. The second factor was "Age" (Table 2). Paired t-test was employed for paired samples from "natural experiments" (Table S12, S13, S15) in

statistical analysis of data from several such pairs of samples of separate “natural experiments” (Table S14).

**Results**

Replicability of the results of collection of sleep times

Comparison of subsets obtained by applying any of arbitrary ways of subdivision of the whole set of 320 samples into two subsets suggested high replicability of the results of such approach to sleep times collection (Supplementary Tables S3 and S4). For example, when we used the year of publication (before 2014 or later) for such an arbitrary subdivision of the whole set of samples into two halves, none of 12 analyzed sleep times significantly differed in two halves as indicated by non-significant main effects of factor “Subset” in two-way MANOVAs (Supplementary Table S3, left). The largest of these differences between these two halves was 7 min (weekend bedtime) and the smallest was one min (weekday risetime).

Figure 1 illustrates the simulated curves consisting of the points divided by the smallest intervals of 6 min length each. Therefore, we only way to show the pairs of subset-averaged sleep times (weekday and weekend bed- and risetimes) obtained from earlier and later publications was to assign any of them to the neighboring points divided by such a 6-min interval. Figure 1 also suggested that the fit between empirical sleep times and their model-based simulation remained excellent despite using the newly obtained results of averaging bed- and risetimes with doubled number of samples as compared to the number of previously simulated samples.

Relating sleep curtailment to later sleep phase and larger time-lag

Our proposed measure of sleep curtailment, actual sleep loss, was introduced here to account for a profound circadian modulation of sleep duration. Figure 1 illustrates that, due to such circadian modulation of the parameters of homeostatic sleep regulation, sleep duration was longer when sleep was initiated earlier in the evening to becoming shorter and shorter with sleep being

initiated later and later. Because the simulation predicted that, in overall, the sleep-wake cycle remained to be entrained by the circadian clocks throughout the week, sleep, even when it was initiated at weekday bedtime (earlier), was expected to be spontaneously terminated at the same circadian clock time as sleep initiated at weekend bedtime (later). This mechanism of entrainment provided stability to the phase of sleep-wake cycle to allow it to remain in synch with the circadian clocks throughout the week despite the termination of sleep on weekdays prior to its expected spontaneous termination. Ideally, a long spontaneously terminated sleep might be observed only at one of 7 nights, between the last working/school day (Friday) and the first free day (Saturday) in the condition when bedtime and risetime are determined exclusively by internal sleep-wake regulating mechanism (e.g., when people do not delay voluntarily their bedtime in the Friday evening). Because sleep in the previous nights was terminated earlier (weekday wakeups), sleep curtailment equals to the difference between weekend and weekday wakeups, that is risetime-lag (Figure 1C), and when this lag is expressed as percentage to total time in bed predicted for Friday-Saturday night, that is the difference between weekday bedtime and weekend risetime, this estimate reveals the amount of actually lost sleep (Tables 1-4, S3-S20).

Figure 2 illustrates the strength of relationships between time-lags, sleep phase and such an actual sleep loss. In particular, the correlation analysis suggested that sleep shortening (reduction of time in bed on weekdays) was unrelated to bedtime-lag but, in contrast, it was very closely related to risetime-lag. This risetime-lag, in turn, demonstrated almost functional relationship with actual sleep loss in accord with the prediction of the model (Figure 2C). For example, when a risetime-lag was small, e.g., just one hour, this lag suggested a relatively small sleep curtailment, but, nevertheless, even such a 1-h risetime-lag corresponded to, at least, 10% weekday sleep loss. When risetime-lag was large, e.g., two hours, weekday sleep loss was doubled (i.e., as many as 20% of expected time in bed was lost on weekdays).

Moreover, significant **but less strong** relationship with sleep loss was shown by such sleep phase measure as risetime on weekends,  $RT_{we}$  (Figure 2F). When, on average, **wakeup occurred** at 9 a.m., the same 20% of expected time in bed was lost, and when risetime was **set** at 10:30, **this resulted in** almost 30% sleep loss. In overall, the estimates of actual sleep loss suggested dramatic **increasing in sleep loss with** delaying sleep phase on free days and, consequently, **with increasing time-lag** (social jetlag).

Table 3 summaries the differences between pairs of subsets representing earlier and later sleep phase **as** indicated by Type,  $RT_{we}$  and  $MT_{sc}$  and smaller and larger social jetlag **as** estimated **with such measures as** RTL, MTL and BTL. Additionally, Figure 3 and Supplementary Figures 1-4 illustrate the relationships of such division with age. The results fully confirmed the results of correlation analysis indicating 1) a profound loss of sleep even in people of M-type characterized by **advanced weekend sleep timing and small social jetlag** and 2) a dramatic increase in sleep loss in people of E-type with **delayed sleep timing on weekend and large social jetlag**. Depending upon measure, the difference between subsets in actual sleep loss varied from 6% to 11% ( $p < 0.001$  for any of 6 comparisons).

For example, M-type was associated with losing, on average, 16% of **time in bed** whereas E-type was associated with losing 10% more **time** (Tables 1 and 3). This implies that more than a quarter, 26%, of sleep was lost by people of late types (Tables 1). **The loss was even higher for some of ages, for instance, approximately a third of total sleep duration in late adolescence (Figure 3).**

Time in bed in relation to later sleep phase and larger time-lag

However, a different and, to our mind, much less realistic picture was painted when sleep curtailment was measured in **the** traditional way, as the difference in time in bed between subsets with different Type,  $RT_{we}$ ,  $MT_{sc}$ , RTL, MTL and BTL (Table 3 and Figures 3, S1-S4). The difference between subsets was mostly non-significant. **When** it was, sometimes, significant, it indicated a shorter sleep in subsets representing early chronotype (or weekend sleep times) and



smaller time-lag, e.g., in the case of early  $RT_{we}$  and smaller BTL (Tables 1, 3 and S5, and Figures 3 and S2).

Even more, weekday time in bed was **also found to be** significantly shorter in the subset with smaller BTL **despite earlier sleep phase** (Table 3). Figures 3 and S1-S4 illustrate statistically significant interaction of weekday time in bed with age. This interaction suggested that, when the difference between subsets was non-significant, it can be explained by a linear relationship between age and weekday time in bed. Interaction term in the results of MANOVAs gave  $F_{7/304} = 5.4, p < 0.001$ ,  $F_{7/304} = 3.4, p < 0.001$ ,  $F_{7/304} = 2.9, p < 0.01$ ,  $F_{7/304} = 2.9, p < 0.01$  and  $F_{7/304} = 4.3, p < 0.001$  for interaction of  $RT_{wd}$  with  $RT_{we}$ ,  $MT_{sc}$ , RTL, MTL and BTL, respectively (e.g., Figures 3, S2 and S4), and interaction term in the results of rANOVA yielded  $F_{7/19} = 3.2, p = 0.02$  for interaction of  $RT_{wd}$  with Type. For instance, Figure S1 shows that weekday time in bed in M-types (with later weekend sleep times and larger social jetlag) was longer only in younger ages to become shorter in older ages.

Thus, these results suggested that, compared to people with earlier sleep phase and smaller time-lag, people with later sleep phase and larger time-lag did not spend in bed, in overall, less time **than the opposing types**, even on weekdays (Tables 3). As for weekly average time in bed (Tables 3 and 4), they tended to stay in bed **even** longer, **namely**, longer on 13, 10 and 20 min as indicated by the estimates of  $RT_{we}$ , MTL and BTL, respectively ( $p < 0.001$  for all).

Time in bed and actual sleep loss in relation to early wakeups

The **estimates of** actual sleep loss and weekly average time in bed were in a better agreement in the **results** of comparison of two subsets with earlier and later  $RT_{wd}$ . They indicated that earlier weekday wakeups significantly increased sleep loss and significantly decreased time in bed (Tables 1, 3 and 4).

However, **such an** increase in sleep loss due to earlier rather than later weekday wakeups was found to be relatively small (2%) in comparison with the described above sleep losses caused by early weekday wakeups per se that reached 15%-16% in samples with earlier sleep phase and 23%-24% in samples with later sleep phase ( $RT_{we}$  and  $MT_{sc}$ ). **Similarly**, in samples with smaller and larger time-lag such **a sleep loss** reached 14%-17% and 23%-25%, respectively (RTL, MTL and BTL). Moreover, **an increase in sleep loss due to earlier rather than later weekday wakeups** was rather small when compared to the difference between **the subsets of these samples obtained by the division** in accord with their earlier-later sleep phase and smaller-larger time-lag (6%-10% and 6%-11%, respectively).

In contrast, **weekly average time in bed demonstrated a relatively large significant reduction** (23 min or 5%) **compared to** the described above difference between either earlier and later sleep phase or between smaller and larger time-lag. **They** were mostly non-significant and, when significant, suggested the opposite direction compared to the direction of reduction of weekly average time in bed with up to 13 min shorter time in bed in samples with earlier phase and up to 20 min smaller time-lag in samples with smaller time-lag (Tables 3 and 4).

None of three-way MANOVAs revealed significant interaction between two factors “Subset” when further division of two subsets of  $RT_{wd}$  (before and after 7 a.m.) into two smaller subsets **was performed to differential samples on** sleep phase and time-lag, ( $RT_{wd}$  vs.  $RT_{we}$ ,  $MT_{sc}$  and **vs.** RTL, MTL, BTL, respectively). Figure 4 illustrates these results indicating that earlier wakeups produced identical effects on samples **characterized by** either earlier and later **sleep** phase or **by** smaller and large time-lag (Tables S4, S7-S11, S16 and S17). Such results, in particular, suggested that none of two chronotypes benefited more from later wakeups and any chronotype suffered from sleep curtailment caused by shifting wakeups on an earlier clock hour. **The results were similar when** the difference between types was measured either as actual sleep loss or as reduction of weekly average time in bed (Tables S4, S10, S11 and S17).

Time in bed and actual sleep loss in “natural experiments”

Sleep times in samples of school age students provided possibility to compare the effects of earlier wakeups, either by comparing with sleep times of later ages when weekday risetimes significantly delayed (Lund et al., 2010; Uner et al., 2009) or by comparing with holidays (Warner et al., 2008) and delayed school start times (Arrona-Palacios & Díaz-Morales, 2018; Arrona-Palacios et al., 2015; Boergers et al., 2014; Brandalize et al., 2011; Carissimi et al., 2016; Lima et al. (2002); Peixoto et al., 2009; Perkinson-Gloor et al., 2013). In overall, they confirmed the results of comparison of the impact of early and late  $RT_{wd}$  on actual sleep loss and weekly average time in bed (Table 4). However, the attending school in early hours was associated with larger and significant sleep loss whereas the reduction of time in bed was much smaller (Table 4, S6, right, S12, S14, S15, S17, right, S18 and S20). Moreover, it was not noted in any of pairs of samples/subsets and, most importantly, it was always found to be non-significant (Table 4, S6, right, S14, S17, right, S18 and S20).

Thus, the results of these “natural experiments” revealed significant actual loss of sleep but did not provide evidence for significant decrease in weekly average time in bed in students of school age as compared to the students of older age and students of the same age attending school in later hours.

Six studies provided possibility of comparison of seasonally of sleep times under observing DST and ST (Friborg et al., 2012; Johnsen et al., 2013; Lo et al., 2014; Lowden et al., 2019; Miller et al., 2010; Shochat et al., 2019). In overall, this dataset does not support the expectation of a significant sleep loss and a significant reduction of weekly average time in bed due to the observing DST (Tables S13, S14, S19 and S20). It only allows the conclusion that the effects of DST seemed to be weaker than the effects of early school start times (Table 4).

The only “natural experiment” allowing the direct comparison of samples collected during perennial DST and perennial ST was provided in a study of school students in northern regions of Russia (Borisenkov et al., 2016). Our estimates suggested that weekly average time in bed was non-significantly reduced under DST (only by 1%). Actual sleep loss was larger, 5%,

but not as large as the permanent sleep curtailment caused, presumably, by early school times, either 36% and 31% during perennial DST and perennial ST, respectively (Tables 4, S15, S19 and S20).

**Discussion**

We tested here the hypotheses that, throughout a 7-day week consisting of 5 working/school days and two free days, E-types (with later sleep timing on free days and larger social jetlag) 1) sleep less than M-types (with earlier sleep timing on free days and smaller social jetlag) and 2) are expected to additionally lose more sleep in response to earlier weekday wakeups, in particular, when observing perennial DST. The answers mostly disagreed one with another when provided by applying the traditional and presented here approaches to estimation of sleep curtailment (by calculating the difference in weekly average time in bed and as the difference between weekend and weekday risetimes divided on the difference between weekend risetime and weekday bedtime).

First, no evidence for significant positive association of the amount of sleep loss with E-type, late sleep timing on free days and larger social jetlag was provided by the results of applying the traditional approach to measurement of sleep curtailment. Instead, a significant positive association with M-type and larger social jetlag was shown for some of six sleep phase and time-lag measures. Do these results of answering to the question of whether E-types sleep less than M-types allow the conclusion that any concerns about vulnerability of E-type (or late sleep timing or large social jetlag) to sleep curtailment and health problems would be ill-advised? The answer seems to be no after applying the proposed here approach to quantification of actual sleep losses. These estimates suggested that, irrespective of whether we are M- or E-types, our usual work/school schedules might be harming our sleep and health. Besides, E-types seem to be more than M-types vulnerable to such effects. They have a higher percentage of lost sleep due to a larger weekend-weekday difference in sleep times. For example, empirical results supported the model prediction that actual sleep loss doubles, from 10% to 20%, due to an

1 increase of the weekend-weekday risetime difference (risetime-lag) from one to two hours  
2  
3 (Figure 2C).  
4  
5

6 **Second**, the answer to the question of whether M-types compared to E-types expected to  
7  
8 lose fewer minutes of sleep when responding to earlier weekday wakeups appeared to be less  
9  
10 dependent upon the applied approach to measurement of sleep curtailment. However, this answer  
11  
12 was no when it was provided by implication of any approach. The results of our analysis  
13  
14 suggested that such responses were fully identical in samples of either M- or E-chronotypes, with  
15  
16 either earlier or later weekend sleep times, and with either smaller or larger time-lag. Therefore,  
17  
18 neither chronotype nor sleep timing on free days nor social jetlag would influence the amount of  
19  
20 sleep lost due to a shift from later to earlier wakeups, in particular, when ST would be ended for  
21  
22 establishing year round DST.  
23  
24  
25

26 The comparison of two conditions of “natural experiments” provided further evidence for  
27  
28 the difference between two approaches to calculation of sleep curtailment. Some of these results  
29  
30 based on traditional approach were again found to be rather paradoxical.  
31  
32

33 For instance, at school age a time-lag was found to be very large due to early school start  
34  
35 times but it became significantly smaller either after shifting school start time on later hours or  
36  
37 after leaving school in a later age. Despite this, evidence for significant sleep curtailment was not  
38  
39 provided by comparing weekly average time in bed reported by students of school age with  
40  
41 weekly average time in bed reported by university/college students or by comparing time in bed  
42  
43 before and after a shift of school start time on later hours. Similar results were provided by the  
44  
45 comparison of samples from two neighboring ages, 16+ and 18+. Such lack of evidence for sleep  
46  
47 curtailment contradicted to the general concern about the epidemic of sleep deprivation among  
48  
49 adolescents (i.e., when schedules maintained during the school year are resulted in insufficient  
50  
51 and ill-timed sleep). For instance, this epidemic was recognized in many postindustrial societies  
52  
53 with different cultural traditions (see Carskadon, 2011; Gradisar et al., 2011; Hagenauer et al.,  
54  
55 2009). However, when actual sleep loss was estimated in accord with the proposed here  
56  
57  
58  
59  
60

approach, the general results of such “natural experiments” pointed at an extremely large sleep curtailment. It is important to emphasize that only the model-based simulation allowed the introduction of this estimate capable to uncover the dramatic permanent sleep curtailment caused by early school times (e.g., it might exceed one third of the total weekday night sleep duration expected in the case of its spontaneous rather than forced termination).

Results on the estimates obtained in “natural experiments” under seasonal switching between DST and ST did not yield a significant curtailment of sleep. Such results were obtained irrespective of the method of calculation of sleep curtailment and it was not a surprise. Such studies cannot separate two opposing effects observed under DST. The first is an increase in actual sleep loss due to earlier wakeups in summer and the second is a seasonal reduction of sleep duration in this season. Such reduction was, for instance, demonstrated in a current study of population in Japan that does not observe DST (Hashizaki et al., 2018). It is important to note that, even when researchers are sampling sleep times under exactly the same photoperiods (e.g. only in certain days of spring and fall), these sleep times remains to be incomparable due to the difference in aftereffects of exposure to short and long photoperiods in the previous winter and summer months, respectively.

Only two samples that were collected in northern regions of Russia allowed the direct comparison of perennial DST with the following perennial ST. The comparison did not reveal an essential reduction of weekly average time in bed. Although it yielded 5% sleep loss, such a loss was relatively small compared to loss caused by early school start times in both conditions. In general, the changes in social clocks in Russia during the last 10 years can be considered a “natural experiment”. However, its results seem to be also inconclusive. Perennial DST was introduced by a Russian president (Medvedev) in March 2011 to be observed until October 2014 when another president from this tandem (Putin) introduced perennial ST. Therefore, if someone would suggest that there was any misunderstanding around the terms “winter time” and “summer time” in Russian population, there was enough time to feel the difference, both before and after

October 2014. Meanwhile, as soon as in summer 2015, several regional parliaments adopted the laws suggesting the return of their regions back to perennial DST (i.e., by adding one to the current number of their time zones). In the last four years (2015-2018), 11 regional parliaments, including the parliament of Novosibirsk region, voted for such a return, and it seems that this process will be continued in the nearest future. Paradoxically, currently in Moscow and Novosibirsk that are the 1<sup>st</sup> and 3<sup>rd</sup> largest cities of Russia located at similar latitudes (55.7°N and 55.0°N), sunrise and sunset on March 15 occur at 6:45 and 18:31 and at 7:44 and 19:30, respectively.

Let us imagine that the difference in weekly average time in bed was accurately estimated during winter months with ST and during summer months with DST by those millions of respondents from an EU public international consultation who voted for year-round “winter time” (European Commission, 2018). In overall, the result of such estimates would be misguided. They would fail to reveal 1) any consistent difference between DST and ST due to seasonal shortening of sleep duration in summer, 2) a large amount of sleep lost due to usual work/school schedules during both DST and ST, and 3) a large difference between M- and E-types in this permanent sleep loss. Further, the comparisons that traditionally relies on calculation of weekly average time in bed would lead them to the conclusion that sleep lost by E-types with later weekend risetimes and larger bedtime-lag during the week is larger than that lost by M-types with earlier weekend risetimes and smaller bedtime-lag. Finally, let us imagine that they carefully read the paper of Borisenkov et al., (2016) with the only published results of direct comparison of sleep times under year round DST and year round ST. They can see in this paper's table that the estimates of weekly average sleep duration were identical for samples collected under perennial DST and perennial ST.

If someone would ask a lay person about his/her personal experience, he/she would confirm that runs short of sleep during the week due to extended wakefulness after the scheduled early wakeups. When Saturday comes, that person feels he/she needs for extra hours of sleep at



Friday-Saturday and Saturday-Sunday nights to get back to optimal condition and, doing so, he/she successfully catches up on lost sleep throughout just two weekend nights to be able, finally, to go back to feeling normal. However, conventional wisdom would not always be right, even when supported by the accurate estimations of weekly average sleep duration and careful reading scientific reports. Our simulation (Figure 1) suggested that people do not sleep the extra time they lost during workdays. Instead, their sleep is mostly of normal and optimal duration during two weekend nights whereas their sleep curtailment during workday is even larger than that provided by calculating the difference between weekend and weekday sleep durations. Therefore, we proposed the estimates of sleep loss that accounted for predictions of a sleep-wake regulatory model and allowed the uncovering a profound negative influence of our usual work/school schedules on weekday sleep duration and, hence, on health.

There are several limitations of the applied method of estimation of sleep curtailment. Only a small fraction of the samples was collected from actigraphic studies of sleep times. We previously showed that one of four sleep times, namely weekend risetime, might be overestimated for some of the samples (Putilov, Verevkin, 2018; Putilov et al., 2019). Moreover, we modified the previously proposed measures of sleep phase and social jet lag by direct utilization of bed- and risetimes rather than sleep onsets and offsets for their calculation. The major reasons for this modification of the previously proposed estimates were the following. First, the authors of most of publications did not report sleep latencies. Second, since the authors of the vast majority of publications collected sleep times from either questionnaire self-reports or sleep diaries, it is hard to imagine that way by which these sleep latencies were self-measured by study participants. Third, in order to calculate most of the estimates, it was necessary to subtract one latency from another, at least, twice. For example, one latency was subtracted from another to obtain a weekend-weekday difference for each sample and then one of the obtained differences in sleep latency was subtracted from another difference in sleep latency to calculate a difference in this difference between two subsets of samples. Therefore, it is unlikely that our



estimates might be significantly challenged even in the case of the existence of small (i.e., few minutes) difference between self-reported sleep latencies.

In conclusion, we proposed **here** a model-based approach for calculation of sleep curtailment caused by earlier weekday wakeups (e.g., due to observing perennial DST). Unlike the difference in time in bed, the suggested measure allows **the** estimation of actual sleep loss without comparison of samples in two conditions. Our estimates **relying on this new methodology** suggested that 1) neither chronotype nor weekend sleep times nor social jetlag **can** influence the change in sleep duration **after** an **advancing** shift of weekday wakeups, 2) E-type with later weekend sleep times and larger social jetlag is associated with a very large sleep loss, and 3) our usual work/school schedules **are the causes of** an essential sleep loss even in M-types with early weekend sleep times and small social jetlag. Compared to this loss, an additional loss due to switching from ST to perennial DST **are expected** to be relatively small. **The** traditional way of calculation of sleep loss **leads to** rather paradoxical conclusions, e.g., 1) that sleep loss is larger when social jetlag is smaller, not larger, 2) that sleep loss is larger when weekend sleep times are **earlier, not later**, 3) that sleep in school students attending school in early hours is not shorter than sleep in school students attending school in later hours or in college/university students **practicing a** 1-h later wakeups, etc.

References

Åkerstedt T, Gillberg M. (1981). The circadian variation of experimentally displaced sleep. *Sleep* 4:159-69.

Arrona-Palacios A, Díaz-Morales JF. (2018). Morningness-eveningness is not associated with academic performance in the afternoon school shift: Preliminary findings. *Br J Educ Psychol.* 88(3):480-498.

Arrona-Palacios A, García A, Valdez P. (2015). Sleep-wake habits and circadian preference in Mexican secondary school. *Sleep Med.* 16(10):1259-64.

Boergers J, Gable CJ, Owens JA. (2014). Later school start time is associated with improved sleep and daytime functioning in adolescents. *J Dev Behav Pediatr.* 35(1):11-7.

Borisenkov MF, Tserne TA, Panev AS, Petrova N.B., Timonin V.D., Kolomeichuk S.N., Vinogradova I.A., Kovyazina M.S., Khokhlov N.A., Kosova A.L., Kasyanova O.N. (2016). Seven-year survey of sleep timing in Russian children and adolescents: chronic 1-h forward transition of social clock is associated with increased social jetlag and winter pattern of mood seasonality. *Biol Rhythm Res* 48:3-12.

Brandalize M, Pereira RF, Leite N, Filho GL, Louzada FM. (2011). Effect of morning school schedule on sleep and anthropometric variables in adolescents: a follow-up study. *Chronobiol Int.* 28(9):779-85.

Carissimi A, Dresch F, Martins AC, Levandovski RM, Adan A, Natale V, Martoni M, Hidalgo MP. (2016). The influence of school time on sleep patterns of children and adolescents. *Sleep Med.* 19:33-9.

Carskadon MA. (2011) Sleep in Adolescents: The Perfect Storm. *Pediatr Clin N Am* 58:637–647.

Daan S, Beersma DGM, Borbély AA. (1984). Timing of human sleep: recovery process gated by a circadian pacemaker. *Am J Physiol Regulatory Integrative Comp Physiol* 246:R161-R178.

EBRS (2019) To the EU Commission on DST. Available (September 9, 2019) at:

<https://www.ebrs-online.org/news/item/dst-statement-ebrs-endorsed>.

ESRS (2019) Joint statement to the EU Commission on DST. Available (September 9, 2019) at:

<https://esrs.eu/joint-statement-to-the-eu-commission/>

European Commission (2018). Public Consultation on EU Summertime Arrangements - Report of Results. Brussels: European Commission. Available (September 9, 2019) at:

<https://eur-lex.europa.eu/legal-content/EN/TXT/?uri=CELEX:52018SC0406> (pdf file:

[https://g8fip1kplyr33r3krz5b97d1-wpengine.netdna-ssl.com/wp-](https://g8fip1kplyr33r3krz5b97d1-wpengine.netdna-ssl.com/wp-content/uploads/2018/09/discontinuing-seasonal-changes-time-swd-406_en.pdf)

[content/uploads/2018/09/discontinuing-seasonal-changes-time-swd-406\\_en.pdf](https://g8fip1kplyr33r3krz5b97d1-wpengine.netdna-ssl.com/wp-content/uploads/2018/09/discontinuing-seasonal-changes-time-swd-406_en.pdf))

Friborg O, Bjorvatn B, Amponsah B, Pallesen S. (2012). Associations between seasonal variations in day length (photoperiod), sleep timing, sleep quality and mood: a comparison between Ghana (5°) and Norway (69°). *J Sleep Res.* 21(2):176-84.

Gradisar M, Gardner G, Dohnt H. (2011). Recent worldwide sleep patterns and problems during adolescence: A review and meta-analysis of age, region, and sleep. *Sleep Med* 12:110–118.

Giuntella O & Mazzonna F. (2019). Sunset Time and the Economic Effects of Social Jetlag Evidence from US Time Zone Borders. *J. Health Econ* 65:210–226.

Gu F, Xu S, Devesa SS, Zhang F, Klerman EB, Graubard BI et al. (2017). Longitude position in a time zone and cancer risk in the United States. *Cancer Epidemiol Prev Biomark* 26:1306–1311.

Hagenauer MH, Perryman JI, Lee TM, Carskadon MA. (2009). Adolescent changes in the homeostatic and circadian regulation of sleep. *Dev Neurosci* 31:276-284.

Hashizaki M, Nakajima H, Shiga T, Tsutsumi M, Kume K. (2018). A longitudinal large-scale objective sleep data analysis revealed a seasonal sleep variation in the Japanese population. *Chronobiol Int* 35:933-945.

Jagnani M. (2019). Poor Sleep: Sunset Time and Human Capital Production. Available (June 9, 2019) at: <https://sites.google.com/view/maulikjagnani/research?authuser=0>.

Jankowski KS. (2017). Social Jet Lag: Sleep-Corrected Formula. *Chronobiol Int* 34:531-535.

Jankowski KS, Vollmer C, Linke M, Randler C. (2014). Differences in sun time within the same time zone affect sleep–wake and social rhythms, but not morningness preference: Findings from a Polish–German comparison study. *Time & Society* 23(2):258-76.

Johnsen MT, Wynn R, Allebrandt K, Bratlid T. (2013). Lack of major seasonal variations in self reported sleep-wake rhythms and chronotypes among middle aged and older people at 69 degrees North: the Tromsø Study. *Sleep Med.* 14(2):140-8.

Lo JC, Leong RL, Loh KK, Dijk DJ, Chee MW. (2014). Young Adults' Sleep Duration on Work Days: Differences between East and West. *Front Neurol.* 5:81.

Lowden A, Lemos N, Gonçalves B, Öztürk G, Louzada F, Pedrazzoli M, Moreno KL. (2018). Delayed Sleep in Winter Related to Natural Daylight Exposure among Arctic Day Workers. *Clocks & Sleep* 1(1), 105-116.

Lund HG, Reider BD, Whiting AB, Prichard JR. (2010). Sleep patterns and predictors of disturbed sleep in a large population of college students. *J Adolesc Health.* 46(2):124-32.

Miller NL, Shattuck LG, Matsangas P. (2010). Longitudinal study of sleep patterns of United States Military Academy cadets. *Sleep* 33(12):1623-1631.

Perkinson-Gloor N, Lemola S, Grob A. (2013). Sleep duration, positive attitude toward life, and academic achievement: the role of daytime tiredness, behavioral persistence, and school start times. *J Adolesc.* 36(2):311-8.

- Peixoto CA, da Silva AG, Carskadon MA, Louzada FM. (2009). Adolescents living in homes without electric lighting have earlier sleep times. *Behav Sleep Med.* 7(2):73-80.
- Putilov AA. (1995). The timing of sleep modelling: circadian modulation of the homeostatic process. *Biol Rhythm Res* 26:1-19.
- Putilov A.A., Verevkin E.G. (2018). Simulation of the ontogeny of social jet lag: a shift in just one of the parameters of a model of sleep-wake regulating process accounts for the delay of sleep phase across adolescence. *Frontiers in Physiology*, 05 November 2018; 9:1529:1-11.
- Putilov A.A., Verevkin E.G., Donskaya O.G., Tkachenko O.N., Dorokhov V.B. (2019). Model-based simulations of weekday and weekend sleep times self-reported by larks and owls. *Biol Rhythm Res* 50. Online link: <https://doi.org/10.1080/09291016.2018.1558735>.
- Roenneberg T, Kuehnle T, Pramstaller PP, Ricken J, Havel M, Guth A, Merrow M. (2004). A marker for the end of adolescence. *Curr Biol* 14:1038–9.
- Roenneberg T, Kuehnle T, Juda M, Kantermann T, Allebrandt K, Gordijn M, Merrow M (2007). Epidemiology of the human circadian clock. *Sleep Med Rev* 11:429–38.
- Roenneberg T, Winnebeck EC & Klerman EB (2019a) Daylight Saving Time and Artificial Time Zones – A Battle Between Biological and Social Times. *Front Physiol* 10:944.
- Roenneberg T, Wirz-Justice A, Skene DJ, Ancoli-Israel S, Wright KP, Dijk DJ, Zee P, Gorman MR, Winnebeck EC, Klerman EB. (2019b). Why Should We Abolish Daylight Saving Time? *J Biol Rhythms* 34:227-230.
- Shochat T, Santhi N, Herer P, Flavell SA, Skeldon AC and Dijk D-J. (2019). Sleep Timing in Late Autumn and Late Spring Associates With Light Exposure Rather Than Sun Time in College Students. *Front. Neurosci.* 13:882.

Skeldon AC & Dijk DJ. (2019) School start times and daylight saving time confuse California lawmakers. *Curr Biol* 29:R278-R279.

SRBR (2019). Daylight Saving Time Presskit. Available (September 9, 2019) at: <https://srbr.org/advocacy/daylight-saving-time-presskit/>.

Urner M, Tornic J, Bloch KE. (2009). Sleep patterns in high school and university students: a longitudinal study. *Chronobiol Int.* 26(6):1222-34.

VoPham T, Weaver MD, Vetter C, Hart JE, Tamimi RM, Laden F et al. (2018). Circadian misalignment and hepatocellular carcinoma incidence in the United States. *Cancer Epidemiol Prev Biomark* 27:719–727.

Warner S, Murray G, Meyer D. (2008). Holiday and school-term sleep patterns of Australian adolescents. *J Adolesc* 31:595–608.

Watson NF. (2019). Time to Show Leadership on the Daylight Saving Time Debate. *J Clin Sleep Med* 15:815-817.

Wittmann, M., Dinich, J., Mellow, M., & Roenneberg, T. (2006). Social jetlag: misalignment of biological and social time. *Chronobiol Int* 23:497–509.

## Tables

**Table 1. Samples sorted into two subsets: weekend and weekday risetimes.**

| Subdivision      |            | Weekend Risettime (RT <sub>we</sub> ) |      |       |      |                    | Weekday Risettime (RT <sub>wd</sub> ) |      |       |      |                    |
|------------------|------------|---------------------------------------|------|-------|------|--------------------|---------------------------------------|------|-------|------|--------------------|
| Two subsets      |            | <9:00                                 |      | >9:00 |      | p for              | <7:00                                 |      | >7:00 |      | p for              |
| Sleep time       |            | Mean                                  | SEM  | Mean  | SEM  | F <sub>1/304</sub> | Mean                                  | SEM  | Mean  | SEM  | F <sub>1/304</sub> |
| Bed-time         | Weekday    | 22.71                                 | 0.07 | 23.04 | 0.06 | <0.001             | 22.63                                 | 0.05 | 23.06 | 0.06 | <0.001             |
|                  | Weekend    | 23.43                                 | 0.06 | 24.31 | 0.06 | <0.001             | 23.67                                 | 0.06 | 24.06 | 0.06 | <0.001             |
|                  | Time-lag   | 0.72                                  | 0.05 | 1.27  | 0.05 | <0.001             | 1.03                                  | 0.04 | 0.99  | 0.05 | 0.562              |
| Rise-time        | Weekday    | 6.81                                  | 0.05 | 7.18  | 0.05 | <0.001             | 6.56                                  | 0.02 | 7.42  | 0.03 | <0.001             |
|                  | Weekend    | 8.24                                  | 0.06 | 9.71  | 0.05 | <0.001             | 8.65                                  | 0.06 | 9.31  | 0.07 | <0.001             |
|                  | Time-lag   | 1.43                                  | 0.06 | 2.53  | 0.05 | <0.001             | 2.09                                  | 0.06 | 1.89  | 0.07 | 0.031              |
| Time in Bed      | Weekday    | 8.10                                  | 0.07 | 8.15  | 0.06 | 0.576              | 7.92                                  | 0.05 | 8.35  | 0.06 | <0.001             |
|                  | Weekend    | 8.80                                  | 0.06 | 9.41  | 0.05 | <0.001             | 8.98                                  | 0.04 | 9.25  | 0.05 | <0.001             |
|                  | Shortening | 0.71                                  | 0.06 | 1.26  | 0.05 | <0.001             | 1.06                                  | 0.05 | 0.90  | 0.05 | 0.038              |
|                  | Average    | 8.30                                  | 0.06 | 8.51  | 0.05 | 0.010              | 8.22                                  | 0.04 | 8.61  | 0.05 | <0.001             |
|                  | Sleep loss | 15.05                                 | 0.50 | 23.57 | 0.45 | <0.001             | 20.58                                 | 0.51 | 18.24 | 0.59 | 0.003              |
| MT <sub>sc</sub> |            | 3.58                                  | 0.05 | 4.56  | 0.05 | <0.001             | 3.78                                  | 0.05 | 4.36  | 0.05 | <0.001             |

Notes. Bedtime and Risettime: Times to go to bed and to wake up, respectively, clock hours

(decimals). Time-lag (TL): Weekend-weekday difference for Rise- and Bedtimes, hours (Figure 1A); Time in Bed: Difference between clock hours for Risettime and Bedtime, hours; Shortening: Reduction of Time in Bed calculated as the weekend-weekday difference in Time in Bed equaled to the difference between Rise- and Bedtime-lags, hours (Figure 1B); Average: Weekly Average Time in Bed calculated as 1/7<sup>th</sup> of the sum of Time in Bed for 5 weekdays and two weekends, hours; Sleep loss: Actual Sleep loss calculated by dividing Risettime-lag on difference between Weekend Risettime and Weekday Bedtime (Figure 1C), in %; SEM: Standard Error of Mean; Weekend and Weekday Risettime (RT<sub>wd</sub> and RT<sub>wd</sub>): Subdivisions of the whole set of 320 samples into a pair of subsets (either 155 or 176 samples with RT<sub>wd</sub> or RT<sub>wd</sub> earlier than either 9:00 or earlier than 7:00, respectively); p for F<sub>1/304</sub>: p-value for main effect of factor “Subset” from two-way MANOVAs, the samples were subdivided into 8 ages (another factor “Age”, see also sample sizes in Table S1 and Figures 3, S2-S4).

**Table 2. Samples of distinct chronotypes and samples sorted in two subsets: sleep phase.**

| Subdivision      |            | Type   |      |        |      |                   | Sleep Corrected Midway Time (MT <sub>sc</sub> ) |      |       |      |                    |
|------------------|------------|--------|------|--------|------|-------------------|-------------------------------------------------|------|-------|------|--------------------|
| Two subsets      |            | M-type |      | E-type |      | p for             | <4:00                                           |      | >4:00 |      | p for              |
| Sleep time       |            | Mean   | SEM  | Mean   | SEM  | F <sub>1/19</sub> | Mean                                            | SEM  | Mean  | SEM  | F <sub>1/304</sub> |
| Bed-time         | Weekday    | 22.33  | 0.11 | 23.34  | 0.15 | <0.001            | 22.60                                           | 0.08 | 23.15 | 0.08 | <0.001             |
|                  | Weekend    | 23.28  | 0.19 | 24.97  | 0.14 | <0.001            | 23.18                                           | 0.07 | 24.38 | 0.07 | <0.001             |
|                  | Time-lag   | 0.94   | 0.13 | 1.62   | 0.13 | <0.001            | 0.57                                            | 0.06 | 1.22  | 0.05 | <0.001             |
| Rise-time        | Weekday    | 6.62   | 0.13 | 7.42   | 0.20 | 0.002             | 6.67                                            | 0.06 | 7.19  | 0.05 | <0.001             |
|                  | Weekend    | 8.25   | 0.22 | 10.31  | 0.20 | <0.001            | 8.27                                            | 0.08 | 9.61  | 0.08 | <0.001             |
|                  | Time-lag   | 1.62   | 0.11 | 2.89   | 0.19 | <0.001            | 1.59                                            | 0.08 | 2.41  | 0.08 | <0.001             |
| Time in Bed      | Weekday    | 8.28   | 0.14 | 8.07   | 0.15 | 0.050             | 8.06                                            | 0.08 | 8.03  | 0.08 | 0.803              |
|                  | Weekend    | 8.97   | 0.16 | 9.34   | 0.11 | 0.016             | 9.08                                            | 0.07 | 9.22  | 0.07 | 0.210              |
|                  | Shortening | 0.68   | 0.13 | 1.26   | 0.16 | 0.002             | 1.02                                            | 0.07 | 1.18  | 0.07 | 0.122              |
|                  | Average    | 8.48   | 0.13 | 8.43   | 0.12 | 0.586             | 8.36                                            | 0.07 | 8.37  | 0.07 | 0.866              |
|                  | Sleep loss | 16.15  | 1.08 | 25.85  | 1.60 | <0.001            | 16.35                                           | 0.74 | 22.73 | 0.70 | <0.001             |
| MT <sub>sc</sub> |            | 3.52   | 0.19 | 5.19   | 0.17 | <0.001            | 3.36                                            | 0.06 | 4.57  | 0.06 | <0.001             |

Notes. Type: 27 pairs of samples were selected as representatives of distinct chronotypes (M[orning]- and E[vening]-types); MT (Midway Time): Midpoint of time in bed calculated by adding a half of Time in Bed to Bedtime, clock hours; MT<sub>sc</sub> (Sleep Corrected Weekend MT): Weekend Bedtime plus a half of Average, clock hours; p for F<sub>1/19</sub>: p-value from two-way rANOVAs for main effect of “Chronotype” (27 paired samples of M- and E-types), the samples were distributed into 8 ages (another factor “Age”, see sample sizes in Table S1); p for F<sub>1/304</sub>: p-value obtained in two-way MANOVAs for main effect of factor “Subset” (165 samples from the whole set of 320 samples with MT<sub>sc</sub> >4:00), the samples were distributed into 8 age groups (another factor “Age”). See also notes to Table 1 and Figures 3, S3 and S4.



**Table 3. Summary on comparisons of samples sorted into two subsets.**

| Sleep time       | Subdivision Subset    | Year <2014      | Type M-type       | RT <sub>we</sub> <9:00 | MT <sub>sc</sub> <4:00 | RTL <2h           | MTL <1.5h         | BTL <1h           | RT <sub>wd</sub> <7:00 |
|------------------|-----------------------|-----------------|-------------------|------------------------|------------------------|-------------------|-------------------|-------------------|------------------------|
| Bed-time         | Weekday               | 5↓ <sup>~</sup> | 1↓ <sup>***</sup> | 4↓ <sup>***</sup>      | 2↓ <sup>***</sup>      | 6↓ <sup>~</sup>   | 7= <sup>~</sup>   | 8↑ <sup>*</sup>   | 3↓ <sup>***</sup>      |
|                  | Weekend               | 8↓ <sup>~</sup> | 2↓ <sup>***</sup> | 3↓ <sup>***</sup>      | 1↓ <sup>***</sup>      | 6↓ <sup>***</sup> | 4↓ <sup>***</sup> | 5↓ <sup>***</sup> | 7↓ <sup>***</sup>      |
|                  | Time-lag in minutes   | 7↓ <sup>~</sup> | 6↓ <sup>***</sup> | 4↓ <sup>***</sup>      | 3↓ <sup>***</sup>      | 5↓ <sup>***</sup> | 2↓ <sup>***</sup> | 1↓ <sup>***</sup> | 8↑ <sup>~</sup>        |
|                  |                       | -3              | -41               | -33                    | -39                    | -35               | -51               | -56               | 2                      |
| Rise-time        | Weekday               | 5↑ <sup>~</sup> | 2↓ <sup>**</sup>  | 4↓ <sup>***</sup>      | 3↓ <sup>***</sup>      | 7↑ <sup>*</sup>   | 6↓ <sup>~</sup>   | 4↓ <sup>~</sup>   | 1↓ <sup>***</sup>      |
|                  | Weekend               | 8↓ <sup>~</sup> | 2↓ <sup>***</sup> | 1↓ <sup>***</sup>      | 3↓ <sup>***</sup>      | 5↓ <sup>***</sup> | 4↓ <sup>***</sup> | 6↓ <sup>***</sup> | 7↓ <sup>***</sup>      |
|                  | in minutes            | -4              | -124              | -88                    | -80                    | -73               | -77               | -62               | -40                    |
|                  | Time-lag in minutes   | 7↓ <sup>~</sup> | 6↓ <sup>***</sup> | 3↓ <sup>***</sup>      | 5↓ <sup>***</sup>      | 1↓ <sup>***</sup> | 2↓ <sup>***</sup> | 4↓ <sup>***</sup> | 8↑ <sup>*</sup>        |
|                  |                       | -5              | -76               | -66                    | -49                    | -82               | -73               | -55               | 12                     |
| Time in Bed      | Weekday in minutes    | 6↑ <sup>~</sup> | 8↑ <sup>+</sup>   | 5↑ <sup>~</sup>        | 3↑ <sup>~</sup>        | 7↑ <sup>*</sup>   | 4↓ <sup>~</sup>   | 2↓ <sup>***</sup> | 1↓ <sup>***</sup>      |
|                  |                       | 5               | 13                | -3                     | 2                      | 13                | -4                | -21               | -26                    |
|                  | Weekend in minutes    | 8↑ <sup>~</sup> | 4↓ <sup>***</sup> | 2↓ <sup>***</sup>      | 7↓ <sup>~</sup>        | 1↓ <sup>***</sup> | 3↓ <sup>***</sup> | 6↓ <sup>***</sup> | 5↓ <sup>***</sup>      |
|                  |                       | 3               | -22               | -37                    | -8                     | -35               | -26               | -19               | -16                    |
|                  | Shortening in minutes | 5↓ <sup>~</sup> | 2↓ <sup>***</sup> | 3↓ <sup>***</sup>      | 6↓ <sup>~</sup>        | 1↓ <sup>***</sup> | 4↓ <sup>***</sup> | 7↑ <sup>~</sup>   | 8↑ <sup>*</sup>        |
|                  |                       | -2              | -35               | -33                    | -10                    | -47               | -22               | 1                 | 10                     |
|                  | Average in minutes    | 7↑ <sup>~</sup> | 8↑ <sup>~</sup>   | 3↓ <sup>*</sup>        | 5↓ <sup>~</sup>        | 6↓ <sup>~</sup>   | 4↓ <sup>+</sup>   | 2↓ <sup>***</sup> | 1↓ <sup>***</sup>      |
|                  |                       | 4               | 3                 | -13                    | -1                     | -1                | -10               | -20               | -23                    |
|                  | % to mean             | 1%              | 1%                | -2%                    | 0%                     | 0%                | -2%               | -4%               | -5%                    |
|                  | Sleep loss in %       | 6↓ <sup>~</sup> | 4↓ <sup>***</sup> | 3↓ <sup>***</sup>      | 5↓ <sup>***</sup>      | 1↓ <sup>***</sup> | 2↓ <sup>***</sup> | 7↓ <sup>***</sup> | 8↑ <sup>**</sup>       |
|                  |                       | -1%             | -10%              | -9%                    | -6%                    | -11%              | -9%               | -6%               | 2%                     |
| MT <sub>sc</sub> |                       | 8↓ <sup>~</sup> | 2↓ <sup>***</sup> | 3↓ <sup>***</sup>      | 1↓ <sup>***</sup>      | 6↓ <sup>***</sup> | 4↓ <sup>***</sup> | 5↓ <sup>***</sup> | 7↓ <sup>***</sup>      |

Notes. Subdivision: The way of subdividing a set of samples into two subsets; Year: Year (of publication), one of the arbitrary divisions into two subsets (see Table S3, left); Subset: One of two Subsets with earlier weekend sleep timing (see Tables 1, 2, S5 and S6); ↑ or ↓ or =: Value in this Subset was either higher or lower or the same as in another subset with later weekend sleep timing; in minutes: This difference between subsets **was** additionally **shown** in minutes, (-) indicates earlier Risetime on Weekends, smaller sleep curtailment due to a smaller Bed- and Risetime-lags and Shortening, and shorter sleep due to shorter Weekday, Weekend and Average Time in Bed; % to mean: The same difference expressed in percentage to mean Average for two subsets; in %: The difference in actual Sleep loss measured in percentage, (-) indicates smaller loss; statistical analyses (Tables 1, 2, S3, S5 and S6) yielded main effect of factor “Subset” with levels of significance <sup>~</sup>( $p > 0.1$ ), <sup>+</sup>( $p < 0.1$  or  $p = 0.05$ ), <sup>\*</sup>( $p < 0.05$  or  $p = 0.01$ ), <sup>\*\*</sup>( $p < 0.01$ ), and <sup>\*\*\*</sup>( $p < 0.001$ ); a value in Subset was also ranked relative to values obtained by 7 other divisions, from the smallest (1) to the largest (8). See also notes to Tables 1, S3, and Figures 3 and S2-S4.

**Table 4. Summary on comparisons of weekly average time in bed and actual sleep loss.**

| Sleep time | Subdivision          | Type             | RT <sub>we</sub> | MT <sub>sc</sub>   | RTL      | MTL                    | BTL     |
|------------|----------------------|------------------|------------------|--------------------|----------|------------------------|---------|
|            | One subset           | M-type           | <9:00            | <4:00              | <2h      | <1.5h                  | <1h     |
| Average    | in minutes           | 3                | -13              | -1                 | -1       | -10                    | -20     |
|            | % to mean            | 1%~              | -2%*             | 0%~                | 0%~      | -2%+                   | -4%***  |
| Sleep loss | in %                 | -10%***          | -9%***           | -6%***             | -11%***  | -9%***                 | -6%***  |
|            | One subset           | RTwd <7:00       |                  | RTwd <7:00         |          | RTwd <7:00             |         |
|            | Further subdivision  | RTL              |                  | MTL                |          | BTL                    |         |
|            | Two subsets          | <2h              | >2h              | <1.5h              | >1.5h    | <1h                    | >1h     |
| Average    | in minutes           | -23              | -25              | -27                | -23      | -26                    | -26     |
|            | % to mean            | -5%***           | -5%***           | -5%***             | -5%***   | -5%***                 | -5%***  |
| Sleep loss | in %                 | 2%**             | 3%**             | 2%*                | 1%*      | 4%***                  | 2%***   |
|            | One subset           | RTwd <7:00       |                  | RTwd <7:00         |          | RT <sub>wd</sub>       | Age     |
|            | Further subdivision  | RT <sub>we</sub> |                  | MT <sub>sc</sub>   |          | <7:00                  | 16+ 18+ |
|            | Two subsets          | <9:00^           | >9:00^           | <4:00^             | >4:00^   | One subset             | 16+     |
| Average    | in minutes           | -31              | -34              | -20                | -37      | -23                    | 3       |
|            | % to mean            | -6%***           | -7%***           | -4%**              | -8%**    | -5%***                 | 1%~     |
| Sleep loss | in %                 | 9%***            | 7%***            | 7%**               | 5%**     | 2%**                   | 8%***   |
|            | “Natural experiment” | DST vs. ST       |                  | School start times |          | In vs. after school in |         |
|            | Another sample(s)    | Seasonal         | Perennial        | Later              | Holidays | University             | College |
|            | Sample(s)            | DST              | DST              | Early              | Early    | School                 | School  |
| Average    | in minutes           | -10              | -4               | -31                | -64      | -9                     | 1       |
|            | % to mean            | -2%+             | -1%              | -6%~               | -12%     | -2%                    | 0%      |
| Sleep loss | in %                 | 0%~              | 5%               | 14%***             | 17%      | 5%                     | 10%     |

Notes. Subdivision: Division of samples into two subsets; One subset: One of two subsets with earlier sleep timing (Tables 1, 2, S5 and S6); in minutes and % to mean: The difference between subsets in Average measured either in minutes or as percentage to mean Average for two subsets; in %: The difference in actual Sleep loss measured in percentage, (-) indicates shorter Average and smaller Sleep loss in One subset; Two subsets: Further subdivision into Two smaller subsets with RT<sub>wd</sub><7:00 and >7:00; ^: For RT<sub>we</sub> and MT<sub>sc</sub>, only three of 8 ages were analyzed (see Table S2); Age (16+ 18+): Two of 8 ages, 16.5-18.0 years and 18.5-23.0 years (Tables S6, right, S17 and S20); DST vs. ST: Seasonal and Perennial DST vs. ST (Tables S13-S15, S19 and S20); School start times: Early vs. Later or vs. Holidays (Tables S11, S14, S15, S18 and S20); In vs. after school: Early wakeups when at School age compared to later wakeups in University/College age (Table S15 and S20); statistical analyses (Tables 1, 2, S4-S10 and S14) yielded main effect of factor “Subset” with levels of significance ~( $p > 0.1$ ), +( $p < 0.1$  or  $p = 0.05$ ), \*( $p < 0.05$  or  $p = 0.01$ ), \*\*( $p < 0.01$ ), and \*\*\*( $p < 0.001$ ). See also notes to Tables 1 and 3.

## Figure Legends

### Figure 1. Weekend-weekday difference in sleep timing and duration.

A. To illustrate the way of calculation of Bed- & Risetime-lags, Bed- and Risetimes for two halves of the whole dataset of 320 samples from earlier and later publications (see Table S3, left) are shown along with the time courses of relative value of slow-wave activity (SWA). Previously, these time courses were **obtained by** **simulating** three sleep-wake cycles of the week (Saturday-Sunday, Wednesday-Thursday, and Friday-Saturday) with a model postulating circadian modulation of SWA (Bed- & Risetimes obtained by averaging over app. a half of the samples were used as a input; **see** Putilov, Verevkin, 2018; Putilov et al., 2019, **and** **Supplementary 3**). The simulation also suggested that Weekend Risetime predicted the phase of sleep-wake cycle at which sleep was spontaneously terminated irrespective of the days of the week. B. To illustrate that Sleep shortening (weekend-weekday change in Time in Bed) equaled to the difference between Rise- and Bedtime-lags, the time course for Wednesday-Thursday and Weekday Bed- and Risetimes were shifted on the interval of Bedtime-lag. C. To illustrate that actual Sleep loss due to earlier weekday wakeups equaled to Risetime-lag, the time course for Wednesday-Thursday and Weekday Bed- and Risetimes were further shifted on the interval of Risetime-lag, i.e., Risetime-lag equaled to sleep duration on Friday-Saturday night minus sleep duration on Wednesday-Thursday; **this means that** the parameters of the homeostatic process are modulated by the circadian clocks in such a way that sleep duration increases with advancing circadian phase at which sleep was spontaneously initiated (see also Figure 2C with empirical data suggesting a very strong correlation between Risetime-lag and Sleep loss).  $SWA_b$  and  $SWA_p$ : To illustrate the impact of circadian modulation of sleep homeostasis, the sine-form time courses of the upper and lower limits of normal variation in SWA are shown, i.e., spontaneous initiation of sleep and wake states was predicted to occur at the upper and lower thresholds of the sleep homeostatic process, respectively. Only further prolongation of wake state above the upper threshold would lead to accumulation of sleep debt, but the simulation did not reveal it.

**Figure 2. Predictors of risetime lag, sleep shortening and sleep loss.**

Lines illustrate linear relationships. A and B. Bed- and Risettime-lags (weekend-weekday difference in Bed- and Risettime, respectively) vs. Sleep shortening (weekend-weekday difference in Time in bed) equaled to the difference between Rise- and Bedtime-lags (A and B, respectively). C and D. Risettime-lags and Sleep shortening vs. Actual sleep loss (Risettime-lag expressed as percentage to the difference between Weekend Risettime and Weekday Bedtime, C and D, respectively). E and F. Risettime-lags and Actual sleep loss vs. Weekend Risettime (E and F, respectively).

**Figure 3. Sleep loss and time in bed in two-subset divisions in accord with sleep phase.**

A. Shortening: Sleep Shortening calculated as the weekend-weekday difference in Time in Bed equaled to the difference between Rise- and Bedtime-lags (Figure 1B). B. Sleep loss: Actual Sleep loss (Figure 1C) calculated by dividing Risettime-lag\*100 on the difference between Weekend Risettime and Weekday Bedtime, in %. C. Weekly Average Time in Bed calculated as 1/7<sup>th</sup> of the sum of times in bed for 5 weekdays and two weekends. D. Time in Bed on Weekdays and Weekends (left and right, respectively). Two subdivisions of the whole set of 320 samples into two subsets, either with different RT<sub>we</sub> (weekend Risettime) or with different MT<sub>sc</sub> (Sleep Corrected weekend Midway Time), and 27 paired samples representing two distinct chronotypes (M- and E-types). See also notes in Table 1, sizes of subsets in Table S1 and see mean (averaged over 8 ages) sleep times in Tables 1, left, and 2.

**Figure 4. Sleep loss and time in bed in 4-subset divisions in accord with time-lag.**

A-D. Sleep Shortening, Actual Sleep loss, Weekly Average Time in Bed, and Weekday and Weekend Time in Bed (the same variables as in Figure 3) in samples sorted into four subsets, with the first division in accord with weekday risetime (<7:00>) and the second division in accord with Time Lags (either 1h<BTL>1h or 1.5h<MTL>1.5h or 2h<RTL>2h). See also sizes of subsets in Table S2 and sleep times in Tables S7-S9.

## Figures

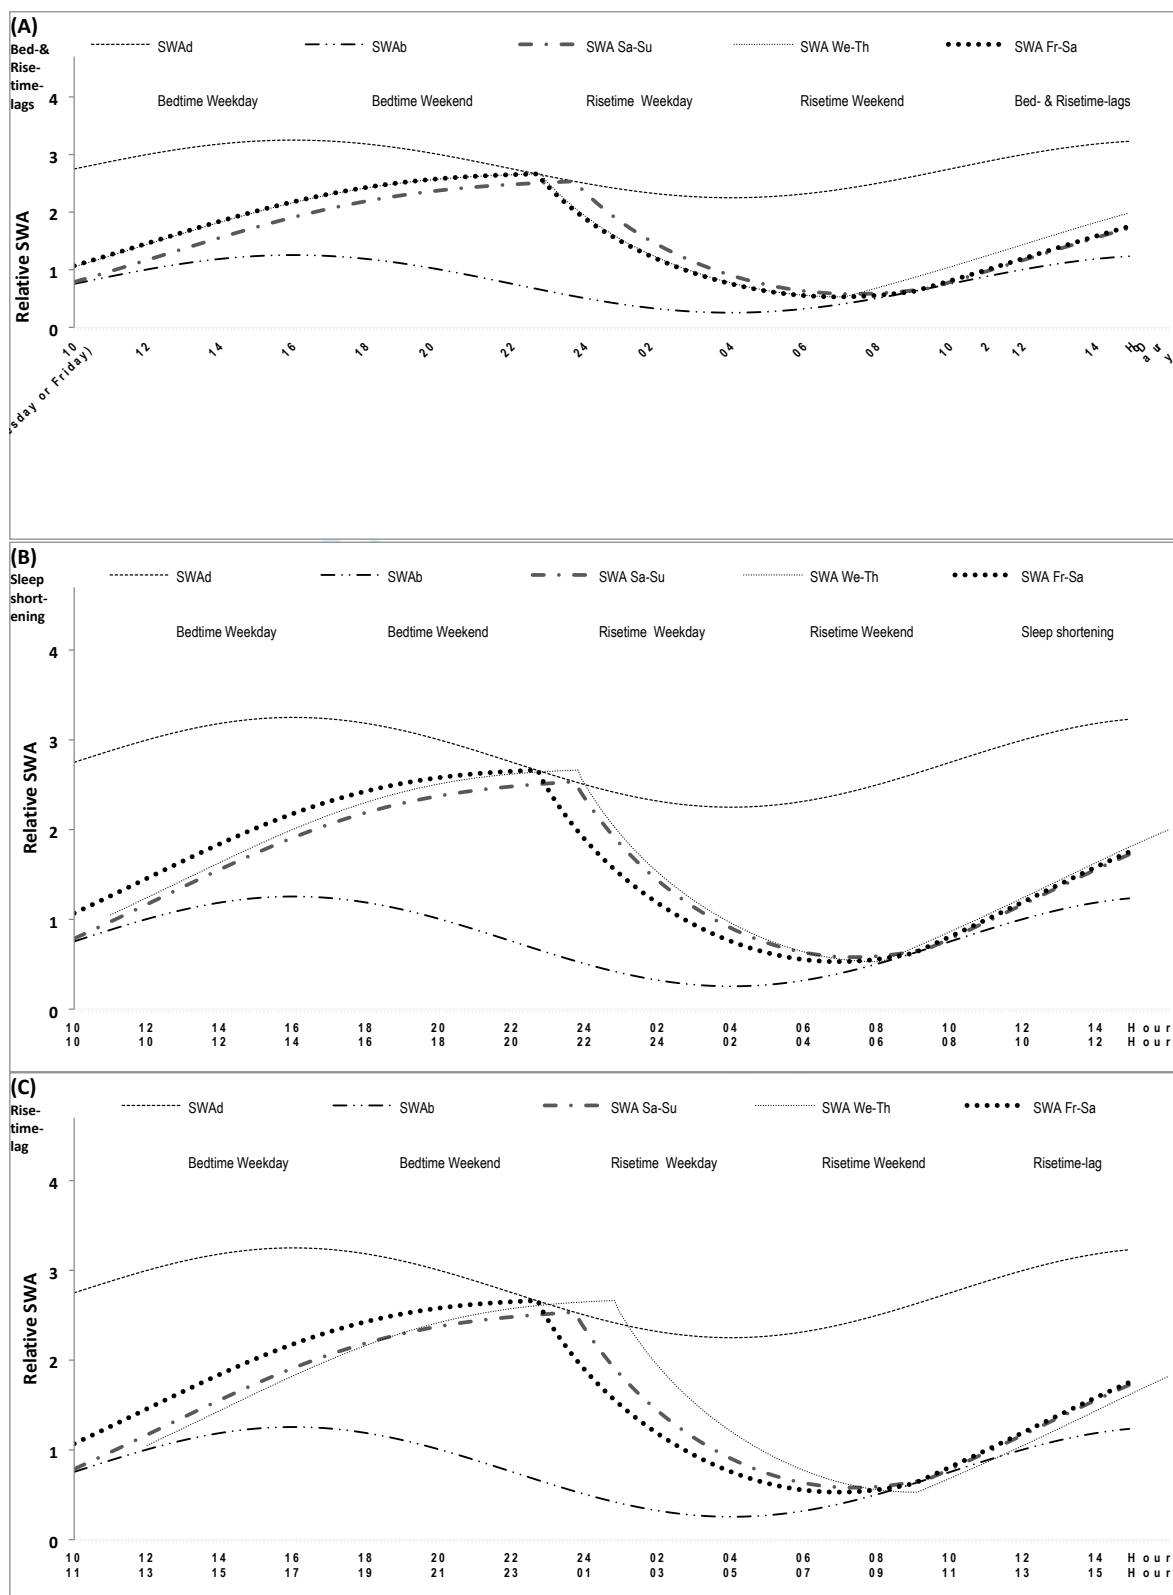

Figure 1

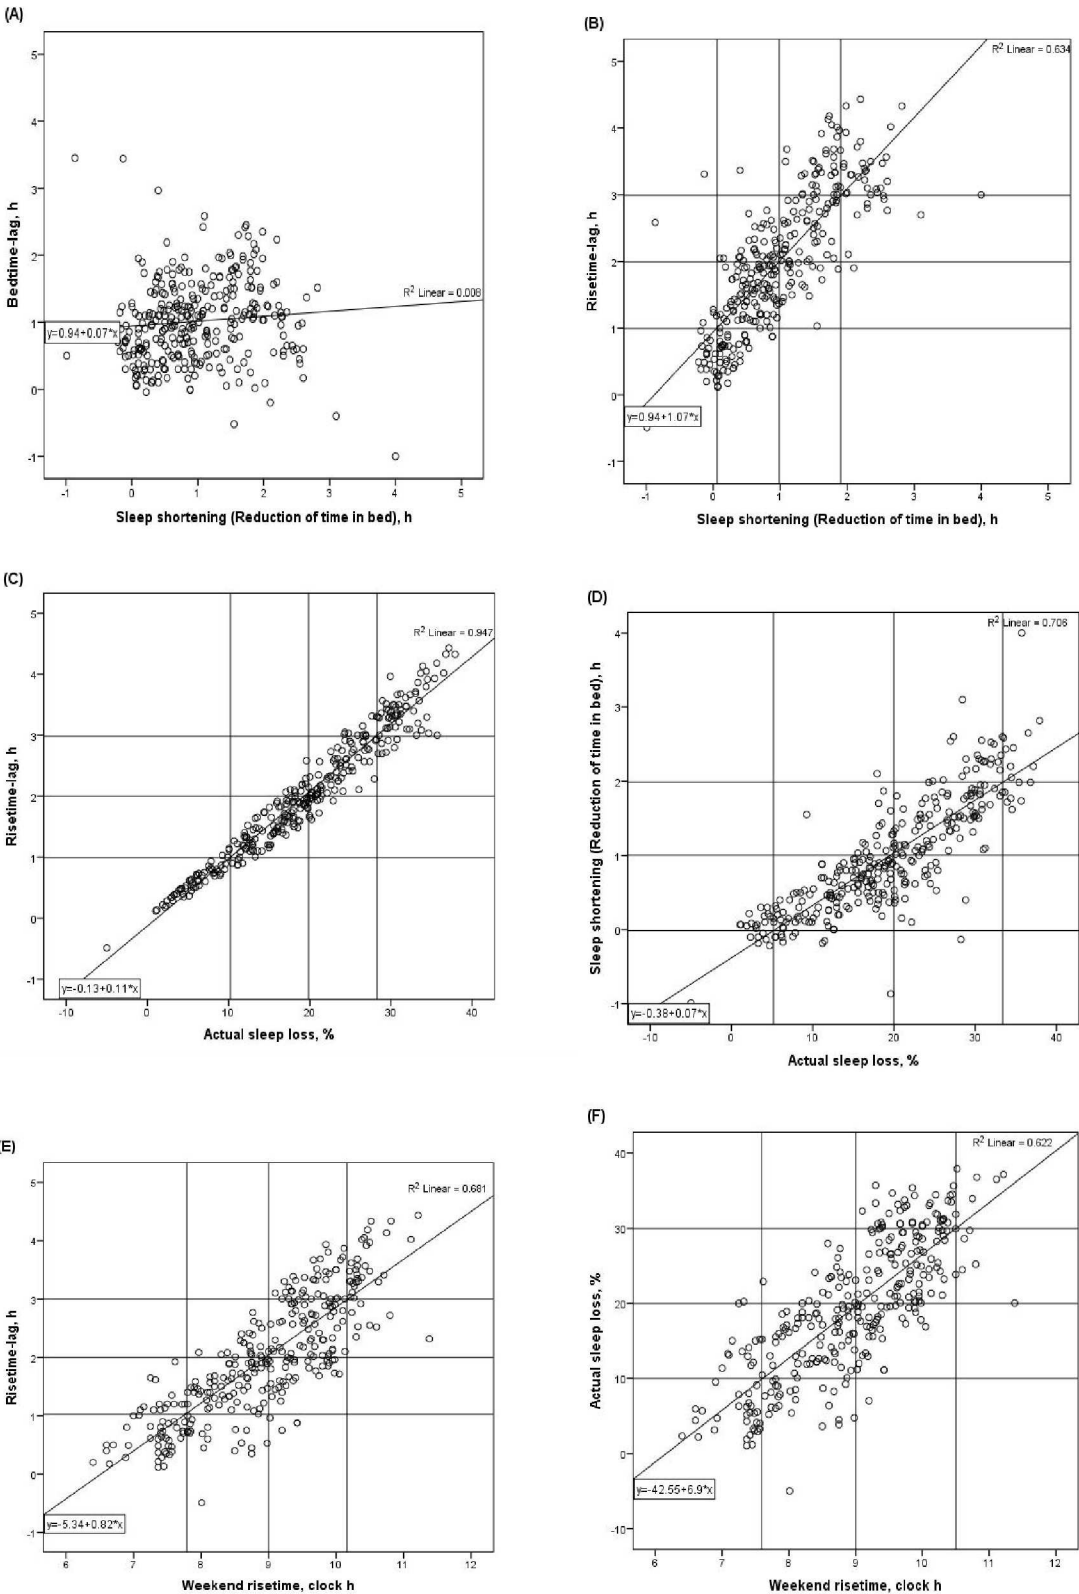

Figure 2

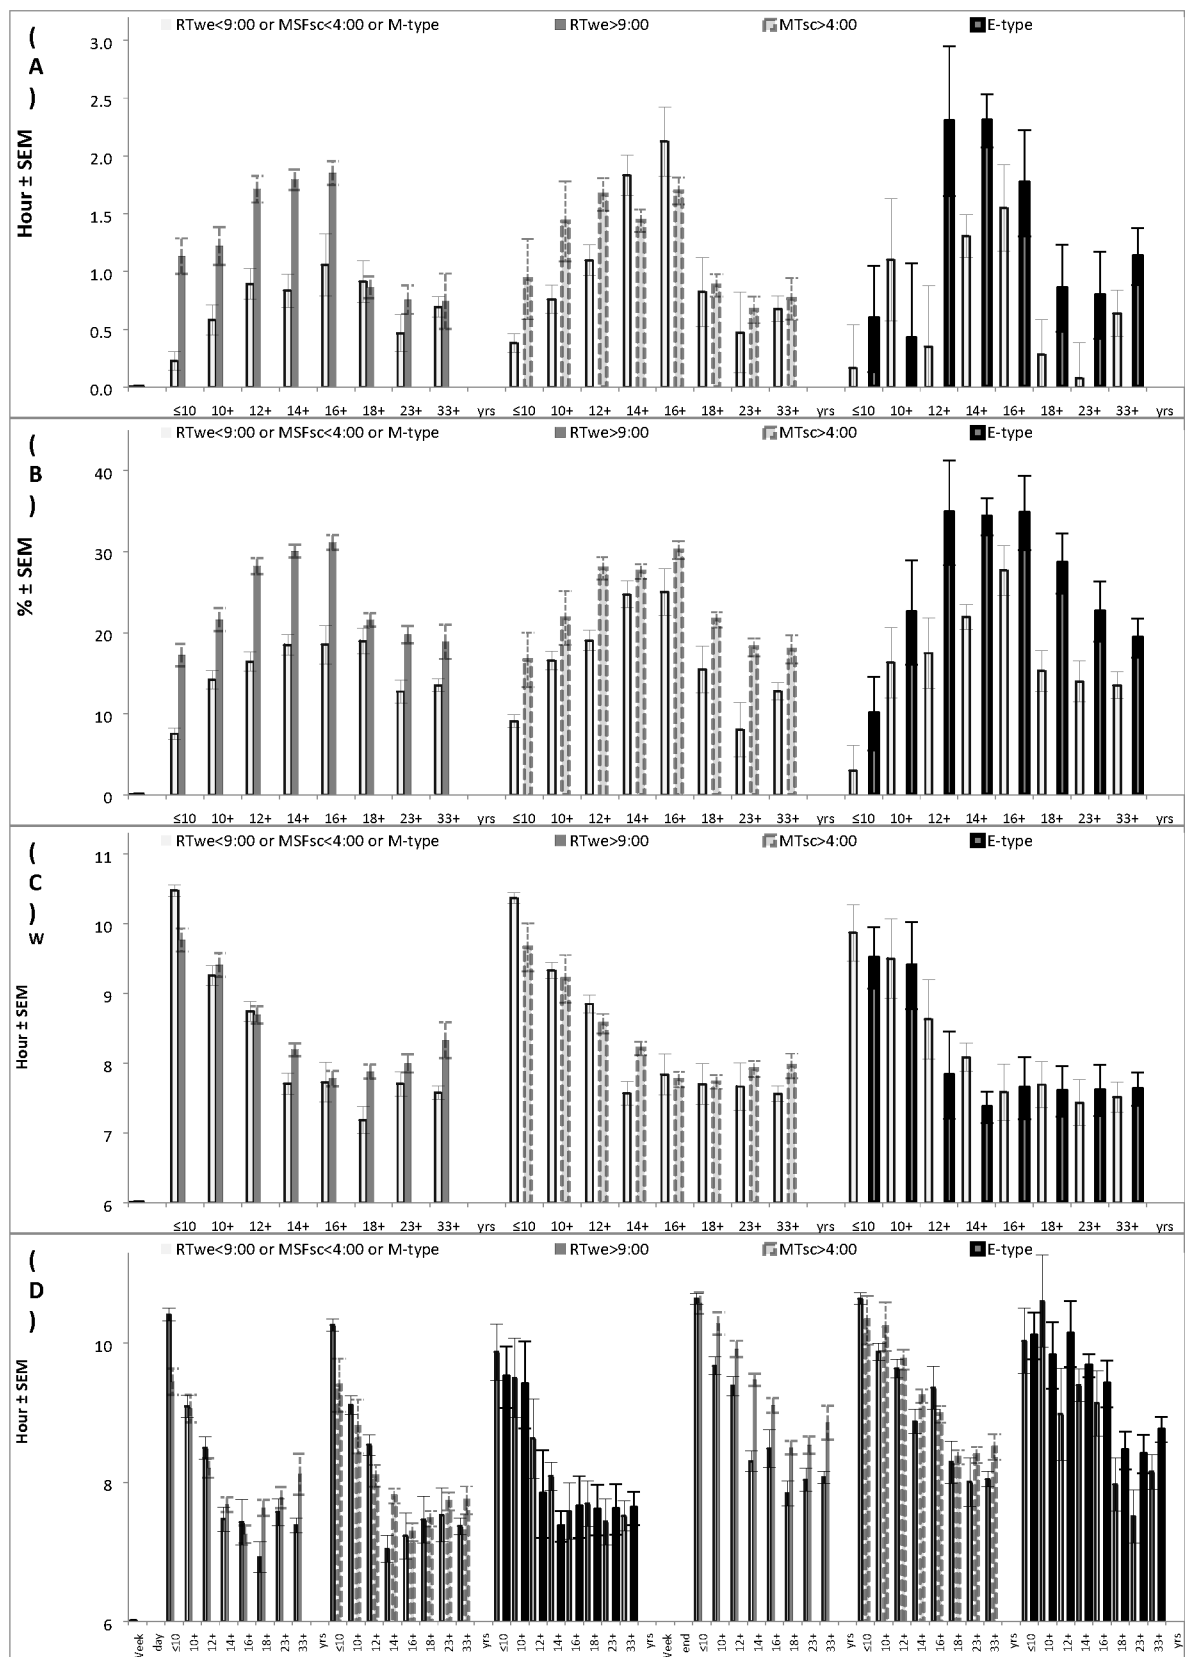

Figure 3

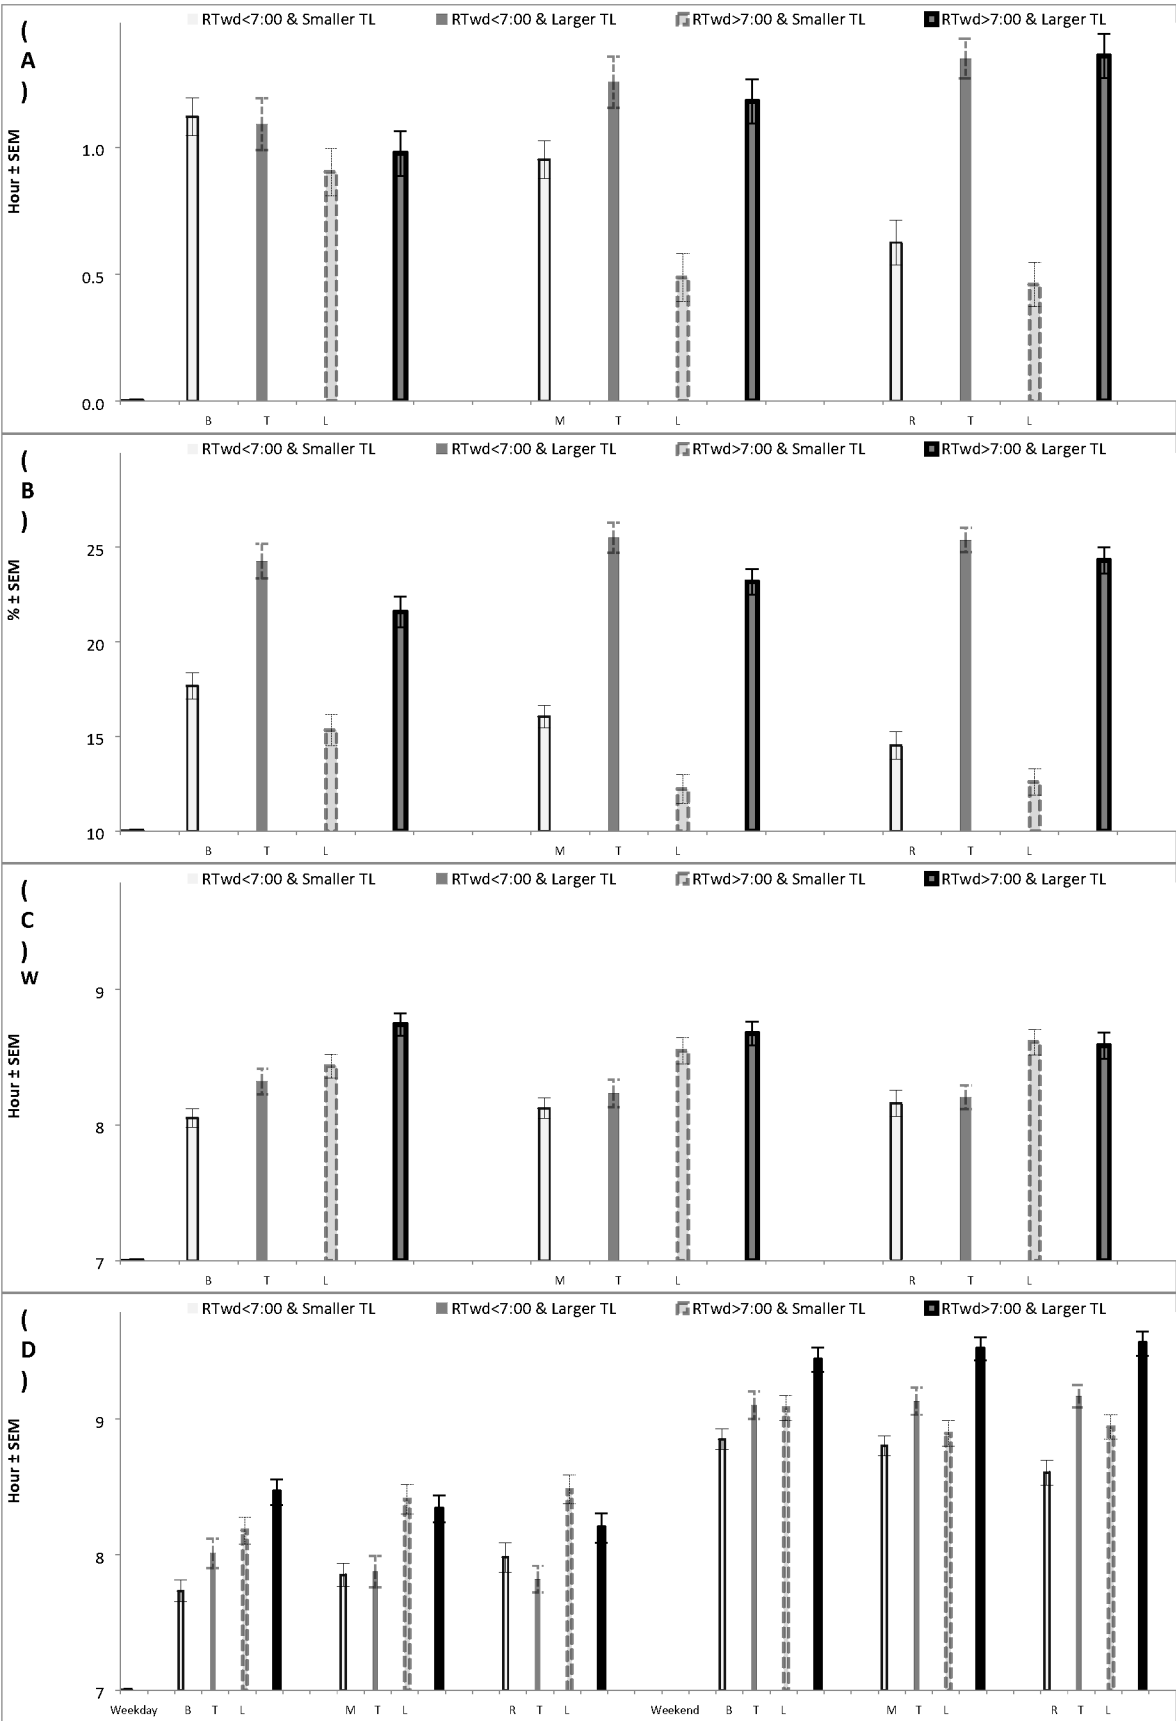

Figure 4



## Supplementary1\_Tables and Figures

to

**Evening chronotype, late weekend sleep times and social jetlag as possible causes of sleep curtailment after maintaining perennial DST: ain't they as black as they are painted?**

## Supplementary Tables

**Table S1. Number of samples included in one of two subsets.**

| Subdivision<br>One subset |      | RT <sub>we</sub><br>>9:00 |      | MT <sub>sc</sub><br>>4:00 |      | RTL<br>>2h |      | MTL<br>>1.5h |      | BTL<br>>1h |      | RT <sub>wd</sub><br>>7:00 |      |
|---------------------------|------|---------------------------|------|---------------------------|------|------------|------|--------------|------|------------|------|---------------------------|------|
| Age                       | Type | n                         | %    | n                         | %    | n          | %    | n            | %    | n          | %    | n                         | %    |
| ≤10                       | 2    | 12                        | 20.0 | 3                         | 5.0  | 9          | 15.0 | 10           | 16.6 | 15         | 25.0 | 39                        | 65.0 |
| 10+                       | 1    | 11                        | 39.2 | 3                         | 10.7 | 12         | 42.8 | 15           | 53.5 | 17         | 60.7 | 8                         | 28.5 |
| 12+                       | 1    | 22                        | 57.8 | 18                        | 47.3 | 26         | 68.4 | 27           | 71.0 | 30         | 78.9 | 9                         | 23.6 |
| 14+                       | 8    | 37                        | 72.5 | 39                        | 76.4 | 40         | 78.4 | 39           | 76.4 | 34         | 66.6 | 14                        | 27.4 |
| 16+                       | 2    | 27                        | 87.1 | 27                        | 87.1 | 29         | 93.5 | 27           | 87.1 | 19         | 61.2 | 8                         | 25.8 |
| 18+                       | 3    | 32                        | 78.0 | 37                        | 90.2 | 22         | 53.6 | 23           | 56.1 | 29         | 70.7 | 30                        | 73.1 |
| 23+                       | 3    | 19                        | 63.3 | 27                        | 90.0 | 10         | 33.3 | 14           | 46.6 | 15         | 50.0 | 22                        | 73.3 |
| 33+                       | 7    | 5                         | 12.2 | 11                        | 26.8 | 4          | 9.7  | 3            | 7.3  | 3          | 7.3  | 14                        | 34.1 |
| Total                     | 27   | 165                       | 51.5 | 165                       | 51.5 | 152        | 47.5 | 158          | 49.3 | 162        | 50.6 | 144                       | 45.0 |

Notes. Age: 8 ages, 10+ refers to ages from 10.5 years to 12.0 years, etc. Total: Either 27 pairs of

samples (Type) or the whole set of 320 samples in subdivisions into two subsets. One subset:

One of two subsets. See sleep times for these subsets in Tables 1, 2, S5 and S6.

**Table S2. Number of samples included in two quarters of subsets.**

| One subset<br>Two subsets |            | RT <sub>wd</sub> <7:00                           |       |     |       | RT <sub>wd</sub> <7:00 |       |                                                  |       | RT <sub>wd</sub> <7:00 |       |     |       |
|---------------------------|------------|--------------------------------------------------|-------|-----|-------|------------------------|-------|--------------------------------------------------|-------|------------------------|-------|-----|-------|
|                           |            | RTL                                              |       | RTL |       | MTL                    |       | MTL                                              |       | BTL                    |       | BTL |       |
|                           |            | <2h                                              |       | >2h |       | <1.5h                  |       | >1.5h                                            |       | <1h                    |       | >1h |       |
| Age                       | Total<br>n | n                                                | %     | n   | %     | n                      | %     | n                                                | %     | n                      | %     | n   | %     |
| ≤10                       | 60         | 18                                               | 35.3  | 3   | 33.3  | 18                     | 36.0  | 3                                                | 30.0  | 17                     | 37.8  | 4   | 26.7  |
| 10+                       | 28         | 10                                               | 62.5  | 10  | 83.3  | 8                      | 61.5  | 12                                               | 80.0  | 6                      | 54.5  | 14  | 82.4  |
| 12+                       | 38         | 7                                                | 58.3  | 22  | 84.6  | 7                      | 63.6  | 22                                               | 81.5  | 6                      | 75.0  | 23  | 76.7  |
| 14+                       | 51         | 6                                                | 54.5  | 31  | 77.5  | 7                      | 58.3  | 30                                               | 76.9  | 13                     | 76.5  | 24  | 70.6  |
| 16+                       | 31         | 1                                                | 50.0  | 22  | 75.9  | 3                      | 75.0  | 20                                               | 74.1  | 9                      | 75.0  | 14  | 73.7  |
| 18+                       | 41         | 5                                                | 26.3  | 6   | 27.3  | 7                      | 38.9  | 4                                                | 17.4  | 4                      | 33.3  | 7   | 24.1  |
| 23+                       | 30         | 5                                                | 25.0  | 3   | 30.0  | 5                      | 31.3  | 3                                                | 21.4  | 5                      | 33.3  | 3   | 20.0  |
| 33+                       | 41         | 25                                               | 67.6  | 2   | 50.0  | 26                     | 68.4  | 1                                                | 33.3  | 26                     | 68.4  | 1   | 33.3  |
| Total                     | 320        | 77                                               | 45.8  | 99  | 65.1  | 81                     | 50.0  | 95                                               | 60.1  | 86                     | 54.4  | 90  | 55.6  |
| One subset<br>Two subsets |            | RT <sub>wd</sub> <7:00                           |       |     |       |                        |       |                                                  |       |                        |       |     |       |
|                           |            | RT <sub>we</sub> <9:00 or MT <sub>sc</sub> <4:00 |       |     |       |                        |       | RT <sub>we</sub> >9:00 or MT <sub>sc</sub> >4:00 |       |                        |       |     |       |
| Age                       |            | 12+                                              |       | 18+ |       | 23+                    |       | 12+                                              |       | 18+                    |       | 23+ |       |
| Total n                   |            | n                                                | %     | n   | %     | n                      | %     | n                                                | %     | n                      | %     | n   | %     |
| RT <sub>we</sub>          | 48         | 11                                               | 28.95 | 8   | 19.51 | 7                      | 23.33 | 18                                               | 47.37 | 3                      | 7.32  | 1   | 3.33  |
| MT <sub>sc</sub>          | 48         | 16                                               | 42.11 | 3   | 7.32  | 2                      | 6.67  | 13                                               | 34.21 | 8                      | 19.51 | 6   | 20.00 |

Notes. Total: 176 samples of one of two subsets obtain in the previous subdivisions into two

subsets (RT<sub>wd</sub> <7:00; see Table S1). One subset: One of two subsets; Two subsets: Further subdivision of one of the subsets into Two subsets. Total: Either the whole set of 320 samples or a subset with smaller number of samples after the first division into Two subsets (see Table S1). See also sleep times for these subsets in Tables S7-S11.

**Table S3. Samples sorted into two subsets: publication year and odd-even number.**

| Subdivision      |            | Year (of publication) |      |       |      |                    | Odd-even number |      |       |      |                    |
|------------------|------------|-----------------------|------|-------|------|--------------------|-----------------|------|-------|------|--------------------|
| Two subsets      |            | <2014                 |      | ≥2014 |      | p for              | Odd             |      | Even  |      | p for              |
| Sleep time       |            | Mean                  | SEM  | Mean  | SEM  | F <sub>1/304</sub> | Mean            | SEM  | Mean  | SEM  | F <sub>1/304</sub> |
| Bed-time         | Weekday    | 22.77                 | 0.05 | 22.83 | 0.05 | 0.414              | 22.80           | 0.06 | 22.81 | 0.06 | 0.594              |
|                  | Weekend    | 23.78                 | 0.05 | 23.89 | 0.05 | 0.183              | 23.88           | 0.06 | 23.81 | 0.06 | 0.781              |
|                  | Time-lag   | 1.01                  | 0.04 | 1.06  | 0.04 | 0.468              | 1.08            | 0.05 | 1.00  | 0.05 | 0.789              |
| Rise-time        | Weekday    | 6.95                  | 0.04 | 6.93  | 0.04 | 0.799              | 6.93            | 0.04 | 6.97  | 0.04 | 0.943              |
|                  | Weekend    | 8.96                  | 0.06 | 9.02  | 0.06 | 0.477              | 9.01            | 0.07 | 9.00  | 0.07 | 0.764              |
|                  | Time-lag   | 2.00                  | 0.06 | 2.09  | 0.06 | 0.332              | 2.07            | 0.06 | 2.03  | 0.06 | 0.733              |
| Time in Bed      | Weekday    | 8.17                  | 0.05 | 8.09  | 0.05 | 0.300              | 8.13            | 0.06 | 8.16  | 0.06 | 0.662              |
|                  | Weekend    | 9.17                  | 0.04 | 9.12  | 0.04 | 0.521              | 9.13            | 0.05 | 9.19  | 0.05 | 0.125              |
|                  | Shortening | 0.99                  | 0.05 | 1.03  | 0.05 | 0.617              | 1.00            | 0.05 | 1.03  | 0.05 | 0.848              |
|                  | Average    | 8.46                  | 0.04 | 8.39  | 0.04 | 0.304              | 8.41            | 0.05 | 8.46  | 0.05 | 0.410              |
|                  | Sleep loss | 19.43                 | 0.50 | 20.20 | 0.50 | 0.278              | 19.99           | 0.51 | 19.67 | 0.51 | 0.655              |
| MT <sub>sc</sub> |            | 4.01                  | 0.05 | 4.09  | 0.05 | 0.316              | 4.09            | 0.06 | 4.03  | 0.05 | 0.950              |

Notes. Bedtime and Risettime: Sleep timing estimated as times to go to bed and to wake up,

respectively, clock hours (decimals). Time-lag (TL): Weekend-weekday difference in sleep

timing estimated for Rise- and Bedtimes, hours (Figure 1A); Time in Bed: Difference between

clock hours for Risettime and Bedtime, hours; Shortening: Reduction of Time in Bed calculated

as the weekend-weekday difference in Time in Bed equaled to the difference between Rise- and

Bedtime-lags, hours (Figure 1B); Average: Weekly Average Time in Bed calculated as 1/7<sup>th</sup> of

the sum of Time in Bed for 5 weekdays and two weekends, hours; MT (Midway Time):

Midpoint of sleep calculated by adding a half of Time in Bed to Bedtime, clock hours; MT<sub>sc</sub>

(Sleep Corrected weekend MT): Weekend Bedtime plus a half of Average, clock hours; Sleep

loss: Actual Sleep loss calculated by dividing Risettime-lag on the difference between Weekend

Risettime and Weekday Bedtime (Figure 1C), in %; SEM: Standard Error of Mean; Year (of

publication) and Odd-even number: Two arbitrary subdivisions of the whole set of 320 samples

into a pair of subsets (either 161 or 160 samples with either later publication years, ≥2014, or

odd number of sample assigned to these numbers after sorting mean ages of people included in

samples from the youngest to oldest age, respectively); p for F<sub>1/304</sub>: p-value for main effect of

factor “Subset” from two-way MANOVAs, the samples were subdivided into 8 ages (another

factor “Age”). See also Table 3.

**Table S4. Samples sorted into two subsets: country and distinct chronotypes.**

| Subdivision      |            | Country |      |          |      |                    | Type-averaged |      |       |      |                    |
|------------------|------------|---------|------|----------|------|--------------------|---------------|------|-------|------|--------------------|
| Two subsets      |            | Germany |      | Other 36 |      | p for              | Averaged      |      | Other |      | p for              |
| Sleep time       |            | Mean    | SEM  | Mean     | SEM  | F <sub>1/304</sub> | Mean          | SEM  | Mean  | SEM  | F <sub>1/304</sub> |
| Bed-time         | Weekday    | 22.74   | 0.14 | 22.82    | 0.04 | 0.550              | 22.84         | 0.17 | 22.79 | 0.04 | 0.800              |
|                  | Weekend    | 23.76   | 0.14 | 23.87    | 0.04 | 0.502              | 24.13         | 0.18 | 23.81 | 0.04 | 0.094              |
|                  | Time-lag   | 1.02    | 0.11 | 1.04     | 0.03 | 0.900              | 1.28          | 0.13 | 1.02  | 0.03 | 0.061              |
| Rise-time        | Weekday    | 7.00    | 0.10 | 6.95     | 0.03 | 0.625              | 7.04          | 0.12 | 6.93  | 0.03 | 0.434              |
|                  | Weekend    | 9.13    | 0.17 | 9.00     | 0.05 | 0.463              | 9.26          | 0.20 | 8.97  | 0.04 | 0.168              |
|                  | Time-lag   | 2.12    | 0.15 | 2.05     | 0.04 | 0.636              | 2.22          | 0.18 | 2.03  | 0.04 | 0.330              |
| Time in Bed      | Weekday    | 8.26    | 0.14 | 8.12     | 0.04 | 0.328              | 8.19          | 0.17 | 8.13  | 0.04 | 0.738              |
|                  | Weekend    | 9.36    | 0.12 | 9.13     | 0.03 | 0.079              | 9.13          | 0.15 | 9.15  | 0.03 | 0.881              |
|                  | Shortening | 1.09    | 0.12 | 1.00     | 0.03 | 0.504              | 0.93          | 0.15 | 1.01  | 0.03 | 0.603              |
| Average          |            | 8.57    | 0.12 | 8.40     | 0.03 | 0.191              | 8.46          | 0.15 | 8.42  | 0.03 | 0.820              |
| Sleep loss       |            | 20.46   | 1.27 | 19.81    | 0.38 | 0.628              | 21.04         | 1.54 | 19.72 | 0.37 | 0.406              |
| MT <sub>sc</sub> |            | 4.01    | 0.05 | 4.09     | 0.05 | 0.316              | 3.78          | 0.05 | 4.36  | 0.05 | <0.001             |

Notes. Country: Arbitrary subdivision of the whole set of samples into two subsets that include samples from Germany and other countries; Type-averaged: Averaged over separately reported sleep times for 27 pairs of samples of M- and E-types and included in the whole set of 320 samples after such an averaging; p for F<sub>1/304</sub>: p-value from two-way MANOVAs for main effect of factor “Subset” (either 44 or 27 samples from the whole set of 320 samples, either collected in Germany or obtained by averaging over M- and E-types, respectively), the samples were assigned to 8 ages (another factor “Age”). See also notes to Table S3.

**Table S5. Samples sorted into two subsets: bed- and risetime-lags.**

| Subdivision      |            | Bedtime-lag (BTL) |      |       |      |            | Risetime-lag (RTL) |      |       |      |             |
|------------------|------------|-------------------|------|-------|------|------------|--------------------|------|-------|------|-------------|
| Two subsets      |            | <1h               |      | >1h   |      | p for      | <2h                |      | >2h   |      | p for       |
| Sleep time       |            | Mean              | SEM  | Mean  | SEM  | $F_{1/19}$ | Mean               | SEM  | Mean  | SEM  | $F_{1/304}$ |
| Bed-time         | Weekday    | 23.00             | 0.06 | 22.76 | 0.06 | 0.012      | 22.83              | 0.08 | 22.88 | 0.07 | 0.663       |
|                  | Weekend    | 23.53             | 0.06 | 24.23 | 0.06 | <0.001     | 23.57              | 0.07 | 24.21 | 0.07 | <0.001      |
|                  | Time-lag   | 0.53              | 0.03 | 1.46  | 0.03 | <0.001     | 0.73               | 0.06 | 1.32  | 0.05 | <0.001      |
| Rise-time        | Weekday    | 6.94              | 0.04 | 7.06  | 0.05 | 0.116      | 7.09               | 0.06 | 6.93  | 0.05 | 0.049       |
|                  | Weekend    | 8.53              | 0.06 | 9.56  | 0.07 | <0.001     | 8.38               | 0.07 | 9.59  | 0.06 | <0.001      |
|                  | Time-lag   | 1.58              | 0.05 | 2.50  | 0.06 | <0.001     | 1.29               | 0.05 | 2.66  | 0.05 | <0.001      |
| Time in Bed      | Weekday    | 7.94              | 0.06 | 8.29  | 0.06 | <0.001     | 8.25               | 0.07 | 8.04  | 0.06 | 0.049       |
|                  | Weekend    | 9.00              | 0.05 | 9.32  | 0.06 | <0.001     | 8.80               | 0.06 | 9.38  | 0.05 | <0.001      |
|                  | Shortening | 1.05              | 0.05 | 1.03  | 0.06 | 0.808      | 0.55               | 0.06 | 1.33  | 0.05 | <0.001      |
|                  | Average    | 8.24              | 0.05 | 8.58  | 0.05 | <0.001     | 8.41               | 0.07 | 8.43  | 0.06 | 0.838       |
|                  | Sleep loss | 16.72             | 0.50 | 23.09 | 0.56 | <0.001     | 13.56              | 0.49 | 24.87 | 0.43 | <0.001      |
| MT <sub>sc</sub> |            | 3.65              | 0.05 | 4.52  | 0.05 | <0.001     | 3.78               | 0.07 | 4.42  | 0.06 | <0.001      |

Notes. BTL (Bedtime-lag) and RTL (Risetime-lag): Time-lag for Bed- and Risetime (Bed- and

Risetime-lag, respectively), hours (Figure 1A and 1C); p for  $F_{1/304}$ : p-value from two-way

MANOVAs for main effect of factor “Subset” (either 162 or 152 samples from the whole set of

320 samples either with BTL>1h or with RTL>2h, respectively), the samples were distributed

into 8 ages (another factor “Age”). See also Tables 3 and S3, and Figures S2-S4.

**Table S6. Samples sorted into two subsets: midway time-lag and two of 8 ages.**

| Subdivision      |            | Midway Time-lag (MTL) |      |       |      |                   | Two ages, 16+ and 18+ |      |       |      |                   |
|------------------|------------|-----------------------|------|-------|------|-------------------|-----------------------|------|-------|------|-------------------|
| Two subsets      |            | <1.5h                 |      | >1.5h |      | p for             | 16+                   |      | 18+   |      | p for             |
| Sleep time       |            | Mean                  | SEM  | Mean  | SEM  | F <sub>1/19</sub> | Mean                  | SEM  | Mean  | SEM  | F <sub>1/70</sub> |
| Bed-time         | Weekday    | 22.87                 | 0.07 | 22.87 | 0.07 | 0.985             | 23.45                 | 0.12 | 23.99 | 0.10 | 0.001             |
|                  | Weekend    | 23.45                 | 0.06 | 24.30 | 0.06 | <0.001            | 24.78                 | 0.10 | 25.13 | 0.09 | 0.017             |
|                  | Time-lag   | 0.57                  | 0.04 | 1.42  | 0.04 | <0.001            | 1.33                  | 0.12 | 1.13  | 0.10 | 0.237             |
| Rise-time        | Weekday    | 6.98                  | 0.05 | 7.04  | 0.05 | 0.390             | 6.72                  | 0.10 | 7.46  | 0.08 | <0.001            |
|                  | Weekend    | 8.36                  | 0.06 | 9.65  | 0.06 | <0.001            | 9.80                  | 0.12 | 9.48  | 0.10 | 0.050             |
|                  | Time-lag   | 1.38                  | 0.05 | 2.60  | 0.05 | <0.001            | 3.08                  | 0.12 | 2.01  | 0.10 | <0.001            |
| Time in Bed      | Weekday    | 8.10                  | 0.06 | 8.16  | 0.07 | 0.522             | 7.27                  | 0.11 | 7.47  | 0.10 | 0.205             |
|                  | Weekend    | 8.91                  | 0.05 | 9.35  | 0.06 | <0.001            | 9.02                  | 0.09 | 8.35  | 0.08 | <0.001            |
|                  | Shortening | 0.81                  | 0.05 | 1.18  | 0.06 | <0.001            | 1.75                  | 0.11 | 0.87  | 0.10 | <0.001            |
| Average          |            | 8.33                  | 0.06 | 8.50  | 0.06 | 0.050             | 7.77                  | 0.09 | 7.72  | 0.08 | 0.712             |
| Sleep loss       |            | 14.76                 | 0.46 | 24.23 | 0.48 | <0.001            | 29.50                 | 1.07 | 21.00 | 0.93 | <0.001            |
| MT <sub>sc</sub> |            | 3.62                  | 0.05 | 4.55  | 0.05 | <0.001            | 4.67                  | 0.11 | 4.99  | 0.09 | 0.035             |

Notes. MTL: Midway Time-lag calculated as weekend-weekday difference in MT (Midway Time), hours; p for F<sub>1/304</sub>: p-value from two-way MANOVAs for main effect of factor “Subset” (158 samples from the whole set of 320 samples with MTL >1.5h), the samples were distributed into 8 ages (another factor “Age”). Two age subdivisions: Only two of 8 ages, ages 16+ (16.5-18.0 years) and 18+ (18.5-23.0 years), n = 31 and 41, respectively; p for F<sub>1/70</sub>: p-value for main effect of factor “Age” from one-way MANOVA. See also notes to Table 1 and S3, and Tables S17 and S20.

**Table S7. Samples sorted into 4 subsets: weekday risetime by bedtime-lag.**

| Sleep time       | Two subsets<br>Four subsets | RT <sub>wd</sub> < 7:00 |      |          |      | RT <sub>wd</sub> > 7:00 |      |          |      | Main effect<br>p for F <sub>1/288</sub> |        |
|------------------|-----------------------------|-------------------------|------|----------|------|-------------------------|------|----------|------|-----------------------------------------|--------|
|                  |                             | BTL < 1h                |      | BTL > 1h |      | BTL < 1h                |      | BTL > 1h |      | RT <sub>wd</sub>                        | BTL    |
| Bed-time         | Weekday                     | 22.80                   | 0.08 | 22.54    | 0.11 | 23.29                   | 0.10 | 23.03    | 0.10 | <0.001                                  | 0.010  |
|                  | Weekend                     | 23.33                   | 0.08 | 24.02    | 0.11 | 23.87                   | 0.10 | 24.39    | 0.10 | <0.001                                  | <0.001 |
|                  | Time-lag                    | 0.53                    | 0.05 | 1.48     | 0.06 | 0.59                    | 0.06 | 1.36     | 0.05 | 0.555                                   | <0.001 |
| Rise-time        | Weekday                     | 6.53                    | 0.04 | 6.55     | 0.06 | 7.47                    | 0.05 | 7.49     | 0.05 | <0.001                                  | 0.680  |
|                  | Weekend                     | 8.18                    | 0.08 | 9.12     | 0.11 | 8.96                    | 0.10 | 9.82     | 0.10 | <0.001                                  | <0.001 |
|                  | Time-lag                    | 1.65                    | 0.08 | 2.58     | 0.10 | 1.49                    | 0.10 | 2.33     | 0.09 | 0.033                                   | <0.001 |
| Time in Bed      | Weekday                     | 7.73                    | 0.08 | 8.01     | 0.11 | 8.18                    | 0.10 | 8.46     | 0.09 | <0.001                                  | 0.003  |
|                  | Weekend                     | 8.85                    | 0.08 | 9.10     | 0.10 | 9.08                    | 0.09 | 9.44     | 0.09 | 0.002                                   | 0.001  |
|                  | Shortening                  | 1.12                    | 0.08 | 1.09     | 0.10 | 0.90                    | 0.09 | 0.98     | 0.09 | 0.067                                   | 0.804  |
|                  | Average                     | 8.05                    | 0.07 | 8.32     | 0.10 | 8.44                    | 0.09 | 8.74     | 0.08 | <0.001                                  | 0.001  |
|                  | Sleep loss                  | 17.66                   | 0.68 | 24.26    | 0.92 | 15.33                   | 0.84 | 21.57    | 0.80 | 0.002                                   | <0.001 |
| MT <sub>sc</sub> |                             | 3.35                    | 0.06 | 4.18     | 0.09 | 4.09                    | 0.08 | 4.76     | 0.08 | <0.001                                  | <0.001 |

Notes. Two subsets: Division of the whole set of 320 samples into two subsets (either 144 or 176

samples with Weekday Risetime, RT<sub>wd</sub>, either earlier or later than 7:00); Four subsets: Further

subdivision of each subsets into two smaller subsets with BTL (Bedtime-lag) calculated as

weekend-weekday difference in Bedtime, either smaller or larger than 1 hour; p for F<sub>1/288</sub>: p-

values from three-way MANOVAs for main effects of two factors “Subset”, the samples were

distributed into 8 ages (factor “Age”, see sizes of subsets in Table S2, notes to Table S3, Table

S16, and Figure 4).

**Table S8. Samples sorted into 4 subsets: weekday risetime by risetime-lag.**

| Sleep<br>time     | Two subsets<br>Four<br>subsets | RT <sub>wd</sub> <7:00 |      |        |      | RT <sub>wd</sub> >7:00 |      |        |      | Main effect<br>p for F <sub>1/288</sub> |        |
|-------------------|--------------------------------|------------------------|------|--------|------|------------------------|------|--------|------|-----------------------------------------|--------|
|                   |                                | RTL<2h                 |      | RTL>2h |      | RTL<2h                 |      | RTL>2h |      | RT <sub>wd</sub>                        | RTL    |
|                   |                                | Mean                   | SEM  | Mean   | SEM  | Mean                   | SEM  | Mean   | SEM  |                                         |        |
| Bed-<br>time      | Weekday                        | 22.59                  | 0.11 | 22.72  | 0.10 | 23.05                  | 0.11 | 23.24  | 0.11 | <0.001                                  | 0.153  |
|                   | Weekend                        | 23.30                  | 0.11 | 24.02  | 0.10 | 23.82                  | 0.11 | 24.51  | 0.11 | <0.001                                  | <0.001 |
|                   | Time-lag                       | 0.71                   | 0.09 | 1.30   | 0.08 | 0.77                   | 0.09 | 1.27   | 0.09 | 0.857                                   | <0.001 |
| Rise-<br>time     | Weekday                        | 6.57                   | 0.06 | 6.54   | 0.05 | 7.53                   | 0.05 | 7.44   | 0.06 | <0.001                                  | 0.239  |
|                   | Weekend                        | 7.91                   | 0.09 | 9.19   | 0.09 | 8.76                   | 0.09 | 10.07  | 0.09 | <0.001                                  | <0.001 |
|                   | Time-lag                       | 1.34                   | 0.08 | 2.65   | 0.08 | 1.23                   | 0.08 | 2.63   | 0.08 | 0.441                                   | <0.001 |
| Time<br>in<br>Bed | Weekday                        | 7.98                   | 0.11 | 7.82   | 0.10 | 8.48                   | 0.11 | 8.20   | 0.11 | <0.001                                  | 0.036  |
|                   | Weekend                        | 8.61                   | 0.09 | 9.17   | 0.08 | 8.94                   | 0.09 | 9.56   | 0.09 | <0.001                                  | <0.001 |
|                   | Shortening                     | 0.63                   | 0.09 | 1.35   | 0.08 | 0.46                   | 0.09 | 1.36   | 0.09 | 0.363                                   | <0.001 |
|                   | Average                        | 8.16                   | 0.10 | 8.21   | 0.09 | 8.61                   | 0.09 | 8.59   | 0.10 | <0.001                                  | 0.915  |
|                   | Sleep loss                     | 14.52                  | 0.71 | 25.38  | 0.65 | 12.58                  | 0.70 | 24.30  | 0.71 | 0.030                                   | <0.001 |
| MT <sub>sc</sub>  |                                | 3.38                   | 0.09 | 4.12   | 0.08 | 4.13                   | 0.09 | 4.80   | 0.09 | <0.001                                  | <0.001 |

Notes. Two subsets: Division of the whole set of 320 samples into two subsets (either 144 or 176

samples with Weekday Risetime, RT<sub>wd</sub>, either earlier or later than 7:00); Four subsets: Further subdivision of each subsets into two smaller subsets with RTL (Risetime-lag) calculated as weekend-weekday difference in Risetime, either smaller or larger than 2 hours; p for F<sub>1/288</sub>: p-values from three-way MANOVAs for main effects of two factors “Subset”, the samples were distributed into 8 ages (factor “Age”, see sizes of subsets in Table S2, notes to Table S3, Table S16, and Figure 4).



**Table S9. Samples sorted into 4 subsets: weekday risetime by midway time-lag.**

| Sleep<br>time     | Two subsets<br>Four<br>subsets | RT <sub>wd</sub> <7:00 |      |          |      | RT <sub>wd</sub> >7:00 |      |          |      | Main effect<br>p for F <sub>1/288</sub> |        |
|-------------------|--------------------------------|------------------------|------|----------|------|------------------------|------|----------|------|-----------------------------------------|--------|
|                   |                                | MTL<1.5h               |      | MTL>1.5h |      | MTL<1.5h               |      | MTL>1.5h |      | RT <sub>wd</sub>                        | MTL    |
|                   |                                | Mean                   | SEM  | Mean     | SEM  | Mean                   | SEM  | Mean     | SEM  |                                         |        |
| Bed-<br>time      | Weekday                        | 22.69                  | 0.09 | 22.66    | 0.12 | 23.12                  | 0.12 | 23.15    | 0.10 | <0.001                                  | 0.988  |
|                   | Weekend                        | 23.21                  | 0.08 | 24.08    | 0.11 | 23.81                  | 0.11 | 24.48    | 0.10 | <0.001                                  | <0.001 |
|                   | Time-lag                       | 0.53                   | 0.06 | 1.42     | 0.08 | 0.69                   | 0.08 | 1.33     | 0.07 | 0.601                                   | <0.001 |
| Rise-<br>time     | Weekday                        | 6.54                   | 0.04 | 6.53     | 0.06 | 7.53                   | 0.06 | 7.49     | 0.05 | <0.001                                  | 0.680  |
|                   | Weekend                        | 8.01                   | 0.07 | 9.21     | 0.10 | 8.71                   | 0.10 | 10.00    | 0.09 | <0.001                                  | <0.001 |
|                   | Time-lag                       | 1.48                   | 0.07 | 2.68     | 0.09 | 1.18                   | 0.09 | 2.51     | 0.08 | 0.004                                   | <0.001 |
| Time<br>in<br>Bed | Weekday                        | 7.85                   | 0.09 | 7.88     | 0.12 | 8.41                   | 0.11 | 8.34     | 0.10 | <0.001                                  | 0.821  |
|                   | Weekend                        | 8.80                   | 0.07 | 9.13     | 0.10 | 8.90                   | 0.10 | 9.52     | 0.09 | 0.008                                   | <0.001 |
|                   | Shortening                     | 0.95                   | 0.07 | 1.26     | 0.10 | 0.49                   | 0.10 | 1.18     | 0.09 | 0.003                                   | <0.001 |
|                   | Average                        | 8.12                   | 0.08 | 8.24     | 0.10 | 8.55                   | 0.10 | 8.68     | 0.09 | <0.001                                  | 0.190  |
|                   | Sleep loss                     | 16.04                  | 0.59 | 25.50    | 0.79 | 12.21                  | 0.76 | 23.16    | 0.68 | <0.001                                  | <0.001 |
| MT <sub>sc</sub>  |                                | 3.27                   | 0.07 | 4.20     | 0.09 | 4.09                   | 0.08 | 4.82     | 0.08 | <0.001                                  | <0.001 |

Notes. Two subsets: Division of the whole set of 320 samples into two subsets (either 144 or 176

samples with Weekday Risetime, RT<sub>wd</sub>, either earlier or later than 7:00); Four subsets: Further

subdivision of each subsets into two smaller subsets with MTL (Midway Time-lag) calculated as

weekend-weekday difference in MT (Midway Time), either smaller or larger than 1.5 hour; p for

F<sub>1/288</sub>: p-values from three-way MANOVAs for main effects of two factors “Subset”, the samples

were distributed into 8 ages (factor “Age”; see sizes of subsets in Table S2, notes to Table S3,

Table S16, and Figure 4).

**Table S10. Samples sorted into 4 subsets: weekday risetime by weekend risetime.**

| Sleep<br>time     | Two subsets<br>Four<br>subsets | RT <sub>wd</sub> <7:00 |      |                        |      | RT <sub>wd</sub> >7:00 |      |                        |      | Main effect             |                  |
|-------------------|--------------------------------|------------------------|------|------------------------|------|------------------------|------|------------------------|------|-------------------------|------------------|
|                   |                                | RT <sub>we</sub> <9:00 |      | RT <sub>we</sub> >9:00 |      | RT <sub>we</sub> <9:00 |      | RT <sub>we</sub> >9:00 |      | p for F <sub>1/97</sub> |                  |
|                   |                                | Mean                   | SEM  | Mean                   | SEM  | Mean                   | SEM  | Mean                   | SEM  | RT <sub>wd</sub>        | RT <sub>we</sub> |
| Bed-<br>time      | Weekday                        | 23.09                  | 0.11 | 23.41                  | 0.21 | 23.37                  | 0.22 | 23.55                  | 0.11 | 0.227                   | 0.144            |
|                   | Weekend                        | 23.89                  | 0.10 | 24.84                  | 0.19 | 23.82                  | 0.20 | 24.81                  | 0.10 | 0.749                   | <0.001           |
|                   | Time-lag                       | 0.80                   | 0.09 | 1.43                   | 0.17 | 0.46                   | 0.18 | 1.26                   | 0.09 | 0.065                   | <0.001           |
| Rise-<br>time     | Weekday                        | 6.61                   | 0.07 | 6.73                   | 0.13 | 7.55                   | 0.13 | 7.56                   | 0.07 | <0.001                  | 0.545            |
|                   | Weekend                        | 8.28                   | 0.08 | 9.64                   | 0.16 | 8.40                   | 0.17 | 9.84                   | 0.08 | 0.229                   | <0.001           |
|                   | Time-lag                       | 1.66                   | 0.10 | 2.91                   | 0.19 | 0.85                   | 0.20 | 2.28                   | 0.10 | <0.001                  | <0.001           |
| Time<br>in<br>Bed | Weekday                        | 7.52                   | 0.10 | 7.32                   | 0.19 | 8.18                   | 0.20 | 8.01                   | 0.10 | <0.001                  | 0.232            |
|                   | Weekend                        | 8.39                   | 0.10 | 8.81                   | 0.19 | 8.57                   | 0.19 | 9.04                   | 0.09 | 0.171                   | 0.004            |
|                   | Shortening                     | 0.87                   | 0.09 | 1.49                   | 0.18 | 0.39                   | 0.19 | 1.03                   | 0.09 | 0.002                   | <0.001           |
|                   | Average                        | 7.77                   | 0.09 | 7.74                   | 0.18 | 8.29                   | 0.18 | 8.30                   | 0.09 | <0.001                  | 0.960            |
|                   | Sleep loss                     | 17.99                  | 0.88 | 28.49                  | 1.72 | 8.99                   | 1.76 | 21.88                  | 0.85 | <0.001                  | <0.001           |
| MT <sub>sc</sub>  |                                | 3.78                   | 0.08 | 4.71                   | 0.15 | 3.97                   | 0.16 | 4.96                   | 0.08 | 0.072                   | <0.001           |

Notes. Two subsets: Division of the whole set of 320 samples into two subsets (either 144 or 176

samples with Weekday Risetime, RT<sub>wd</sub>, either earlier or later than 7:00); Four subsets: Further subdivision of each subsets into two subsets with RT<sub>we</sub> (Weekend Risetime), either earlier or later than 9:00; p for F<sub>1/97</sub>: p-values from three-way MANOVA for main effects of two factors “Subset”, the samples were distributed into 3 ages (factor “Age”, see sizes of subsets in lower part of Table S2, notes to Table S3, and Table S17).

**Table S11. Samples sorted into 4 subsets: weekday risetime by sleep corrected midway time**

| Sleep time       | Two subsets<br>Four subsets | RT <sub>wd</sub> <7:00 |      |                        |      | RT <sub>wd</sub> >7:00 |      |                        |      | Main effect<br>p for F <sub>1/288</sub> |                  |
|------------------|-----------------------------|------------------------|------|------------------------|------|------------------------|------|------------------------|------|-----------------------------------------|------------------|
|                  |                             | MT <sub>sc</sub> <4:00 |      | MT <sub>sc</sub> >4:00 |      | MT <sub>sc</sub> <4:00 |      | MT <sub>sc</sub> >4:00 |      | RT <sub>wd</sub>                        | MT <sub>sc</sub> |
|                  |                             | Mean                   | SEM  | Mean                   | SEM  | Mean                   | SEM  | Mean                   | SEM  |                                         |                  |
| Bed-time         | Weekday                     | 22.84                  | 0.16 | 23.36                  | 0.10 | 23.20                  | 0.26 | 23.59                  | 0.09 | 0.076                                   | 0.007            |
|                  | Weekend                     | 23.45                  | 0.14 | 24.62                  | 0.09 | 23.63                  | 0.22 | 24.76                  | 0.08 | 0.248                                   | <0.001           |
|                  | Time-lag                    | 0.62                   | 0.15 | 1.26                   | 0.09 | 0.44                   | 0.23 | 1.17                   | 0.08 | 0.373                                   | <0.001           |
| Rise-time        | Weekday                     | 6.56                   | 0.11 | 6.65                   | 0.07 | 7.38                   | 0.17 | 7.59                   | 0.06 | <0.001                                  | 0.171            |
|                  | Weekend                     | 8.08                   | 0.17 | 9.14                   | 0.11 | 8.25                   | 0.27 | 9.70                   | 0.09 | 0.037                                   | <0.001           |
|                  | Time-lag                    | 1.52                   | 0.19 | 2.49                   | 0.12 | 0.87                   | 0.30 | 2.11                   | 0.11 | 0.010                                   | <0.001           |
| Time in Bed      | Weekday                     | 7.72                   | 0.15 | 7.29                   | 0.09 | 8.18                   | 0.23 | 8.00                   | 0.08 | <0.001                                  | 0.046            |
|                  | Weekend                     | 8.63                   | 0.16 | 8.53                   | 0.10 | 8.62                   | 0.26 | 8.94                   | 0.09 | 0.232                                   | 0.538            |
|                  | Shortening                  | 0.91                   | 0.16 | 1.23                   | 0.10 | 0.44                   | 0.25 | 0.93                   | 0.09 | 0.021                                   | 0.014            |
|                  | Average                     | 7.98                   | 0.13 | 7.65                   | 0.09 | 8.31                   | 0.21 | 8.27                   | 0.08 | 0.001                                   | 0.172            |
|                  | Sleep loss                  | 15.80                  | 1.63 | 24.97                  | 1.05 | 9.18                   | 2.58 | 20.41                  | 0.92 | 0.001                                   | <0.001           |
| MT <sub>sc</sub> |                             | 3.44                   | 0.12 | 4.44                   | 0.08 | 3.79                   | 0.19 | 4.90                   | 0.07 | 0.002                                   | <0.001           |

Notes. Two subsets: Division of the whole set of 320 samples into two subsets (either 144 or 176

samples with Weekday Risetime, RT<sub>wd</sub>, either earlier or later than 7:00); Four subsets: Further

subdivision of each subsets into two smaller subsets with MT<sub>sc</sub> (Sleep Corrected Midway Time),

either earlier or later than 4:00; p for F<sub>1/97</sub>: p-values from three-way MANOVA for main effects

of two factors “Subset”, the samples were distributed into 3 ages (factor “Age”, see sizes of

subsets in lower part of Table S2, notes to Table S3, and Table S17).

**Table S12. Early and later school start times in “natural experiments” (be continued).**

| Reference<br>School<br>times | Perkinson-<br>Gloor et al |       | Arrona-Palacios<br>et al |       | Arrona-Palacios<br>& Díaz-Morales |       | Carissimi<br>et al |       | Boergers<br>et al |       |
|------------------------------|---------------------------|-------|--------------------------|-------|-----------------------------------|-------|--------------------|-------|-------------------|-------|
|                              | Early                     | Later | Early                    | Later | Early                             | Later | Early              | Later | Early             | Later |
| Weekday                      | 22.47                     | 22.65 | 23.00                    | 24.10 | 22.82                             | 24.33 | 22.17              | 22.86 | 23.80             | 23.73 |
| Weekend                      | 24.78                     | 24.98 | 24.50                    | 25.20 | 24.42                             | 25.42 | 23.43              | 23.51 | 24.75             | 24.77 |
| Time-lag                     | 2.31                      | 2.33  | 1.50                     | 1.10  | 1.60                              | 1.08  | 1.26               | 0.65  | 0.95              | 1.03  |
| Weekday                      | 6.43                      | 6.88  | 6.18                     | 9.48  | 6.08                              | 9.57  | 6.23               | 8.21  | 7.03              | 7.43  |
| Weekend                      | 10.74                     | 10.9  | 10.5                     | 10.97 | 9.47                              | 9.30  | 8.86               | 9.07  | 9.85              | 9.88  |
| Time-lag                     | 4.31                      | 4.02  | 4.32                     | 1.48  | 3.38                              | -0.27 | 2.63               | 0.87  | 2.82              | 2.45  |
| Weekday                      | 7.97                      | 8.23  | 7.18                     | 9.38  | 7.27                              | 9.23  | 8.06               | 9.35  | 7.23              | 7.70  |
| Weekend                      | 9.97                      | 9.92  | 10.00                    | 9.77  | 10.00                             | 9.77  | 9.43               | 9.56  | 9.10              | 9.12  |
| Shortening                   | 2.00                      | 1.68  | 2.82                     | 0.38  | 2.73                              | 0.53  | 1.37               | 0.21  | 1.87              | 1.42  |
| Average                      | 8.54                      | 8.71  | 7.99                     | 9.49  | 8.05                              | 9.39  | 8.45               | 9.41  | 7.77              | 8.10  |
| Sleep loss                   | 35.1                      | 32.79 | 37.54                    | 13.65 | 31.77                             | -2.97 | 24.57              | 8.47  | 28.03             | 24.14 |
|                              | 5.04                      | 5.34  | 4.49                     | 5.95  | 4.44                              | 6.11  | 3.65               | 4.22  | 4.63              | 4.82  |

Notes. Perkinson-Gloor et al. (2013): School start time was either advanced or delayed on 20 min for 2373 and 343 15.5-yr Swiss students,  $RT_{wd}$  6:26 or 6:53, respectively; Arrona-Palacios et al. (2015): 287 and 281 14-yr Mexican adolescents,  $RT_{wd}$  06:11 and 09:29; Arrona-Palacios & Díaz-Morales (2018): 200 and 200 14-yr old Mexican adolescents,  $RT_{wd}$  06:05 and 09:34 with school start times 07:30 and 13:20, respectively (the same in both publications); Carissimi et al. (2016): 538 and 101 school students in southern Brazil, ages 13 and 11 years,  $RT_{wd}$  6.23 and 8.21 with school start times 07:30 and 13:20, respectively; Boergers et al. (2014): 197 14-yr US students studied in Time 1 and Time 2 (regular and experimental) with school start times 08:00 and 8:25,  $RT_{wd}$  7.02 and 7.26, respectively. See also notes to Table S3, averaging in Table S14 and summary in Tables S18 and S20.

**Table S12 (continued). Early and later school start times in “natural experiments”.**

| Sleep time       | Reference School times | Brandalize et al |       | Lima et al |       | Peixoto et al. Electricity at home: |       |         |       |
|------------------|------------------------|------------------|-------|------------|-------|-------------------------------------|-------|---------|-------|
|                  |                        | Early            | Later | Early      | Later | With                                |       | Without |       |
|                  |                        | Early            | Later | Early      | Later | Early                               | Later | Early   | Later |
| Bed-time         | Weekday                | 22.57            | 22.88 | 23.78      | 24.42 | 21.85                               | 23.88 | 20.63   | 23.77 |
|                  | Weekend                | 23.75            | 23.67 | 24.3       | 25.23 | 22.07                               | 22.22 | 21.77   | 21.02 |
|                  | Time-lag               | 1.18             | 0.78  | 0.52       | 0.82  | 0.22                                | -1.67 | 1.13    | -2.75 |
| Rise-time        | Weekday                | 6.53             | 8.97  | 6.52       | 7.72  | 6.60                                | 7.97  | 6.40    | 7.37  |
|                  | Weekend                | 9.80             | 9.75  | 8.20       | 8.90  | 6.88                                | 7.83  | 6.77    | 6.90  |
|                  | Time-lag               | 3.27             | 0.78  | 1.68       | 1.18  | 0.28                                | -0.13 | 0.37    | -0.47 |
| Time in Bed      | Weekday                | 7.97             | 10.08 | 6.73       | 7.30  | 8.75                                | 8.08  | 9.77    | 7.60  |
|                  | Weekend                | 10.05            | 10.08 | 7.90       | 7.67  | 8.82                                | 9.62  | 9.00    | 9.88  |
|                  | Shortening             | 2.08             | 0.00  | 1.17       | 0.37  | 0.07                                | 1.53  | -0.77   | 2.28  |
|                  | Average                | 8.56             | 10.08 | 7.07       | 7.40  | 8.77                                | 8.52  | 9.55    | 8.25  |
|                  | Sleep loss             | 29.08            | 7.21  | 20.00      | 13.95 | 3.14                                | -1.68 | 3.62    | -6.54 |
| MT <sub>sc</sub> |                        | 4.03             | 4.71  | 3.83       | 4.94  | 2.45                                | 2.48  | 2.54    | 1.14  |

Notes. Brandalize et al. (2011): 379 12.5-yr students from southern Brazil before and after

transition from 13:00 to 7:30 school start times, RT<sub>wd</sub> 06:32 and 09:48, respectively; Lima et al. (2002): 27 20-yr medical students in northern Brazil with classes started either at 7:00/8:00 or at 10:00, RT<sub>wd</sub> 06:31 and 07:43, respectively; Peixoto et al., (2009): 15 12.5-yr and 13 13-yr students in southern Brazil, With Electricity at home, attended school classes started at 07:30 and 19:00, respectively, vs. 5 12.5-yr and 6 14.5 yr students, respectively, Without Electricity at home, RT<sub>wd</sub> 06:36 and 07:58 vs. 06:24 and 07:22, respectively. See also notes to Table S3, averaging in Table S14 and summary in Tables S18 and S20.

**Table S13. Seasonal alternation between DST and ST in “natural experiments”.**

| Reference<br>DST & ST<br>Age, years | Miller et al<br>DST<br>18.5 | ST<br>19 | Shochat et al<br>DST<br>19 | ST<br>18.5 | Lo et al<br>DST<br>25 | ST<br>25          | Johnsen et al<br>DST<br>52 | ST<br>54 | Friborg et al<br>DST<br>23 | ST<br>22.5 | Lowden et al<br>DST<br>45 | ST<br>45.5 |
|-------------------------------------|-----------------------------|----------|----------------------------|------------|-----------------------|-------------------|----------------------------|----------|----------------------------|------------|---------------------------|------------|
| Weekday                             | 23.35 <sup>#</sup>          | 24.38    | 23.53 <sup>#</sup>         | 24.57      | 22.30 <sup>#</sup>    | 23.42             | 22.53 <sup>#</sup>         | 23.50    | 22.78 <sup>#</sup>         | 23.98      | 22.50 <sup>#</sup>        | 23.08      |
| Weekend                             | 23.88 <sup>#</sup>          | 25.28    | 24.18 <sup>#</sup>         | 25.07      | 23.30 <sup>#</sup>    | 24.38             | 23.32 <sup>#</sup>         | 24.35    | 24.05 <sup>#</sup>         | 25.25      | 22.07 <sup>#</sup>        | 24.10      |
| Time-lag                            | 0.53                        | 0.90     | 0.65                       | 0.50       | 1.00                  | 0.97              | 0.78                       | 0.85     | 1.27                       | 1.27       | -0.43                     | 1.02       |
| Weekday                             | 5.22 <sup>#</sup>           | 6.27     | 7.73 <sup>#</sup>          | 8.88       | 6.68 <sup>#</sup>     | 7.80 <sup>#</sup> | 5.60 <sup>#</sup>          | 6.65     | 7.07 <sup>#</sup>          | 8.60       | 4.53 <sup>#</sup>         | 5.88       |
| Weekend                             | 7.27 <sup>#</sup>           | 8.93     | 9.12 <sup>#</sup>          | 9.63       | 7.82 <sup>#</sup>     | 9.05 <sup>#</sup> | 7.15 <sup>#</sup>          | 8.67     | 9.00 <sup>#</sup>          | 10.10      | 5.98 <sup>#</sup>         | 7.67       |
| Time-lag                            | 2.05                        | 2.67     | 1.38                       | 0.75       | 1.13                  | 1.25              | 1.55                       | 2.02     | 1.93                       | 1.50       | 1.45                      | 1.78       |
| Weekday                             | 5.87                        | 5.88     | 8.20                       | 8.32       | 8.38                  | 8.38              | 7.07                       | 7.15     | 8.28                       | 8.62       | 6.03                      | 6.80       |
| Weekend                             | 7.38                        | 7.65     | 8.93                       | 8.57       | 8.52                  | 8.67              | 7.83                       | 8.32     | 8.95                       | 8.85       | 7.92                      | 7.57       |
| Shortening                          | 1.52                        | 1.77     | 0.73                       | 0.25       | 0.13                  | 0.28              | 0.77                       | 1.17     | 0.67                       | 0.23       | 1.88                      | 0.77       |
| Average                             | 6.30                        | 6.39     | 8.41                       | 8.39       | 8.42                  | 8.46              | 7.29                       | 7.48     | 8.47                       | 8.68       | 6.57                      | 7.02       |
| Sleep loss                          | 25.89                       | 31.19    | 14.39                      | 8.28       | 11.87                 | 12.98             | 17.99                      | 22.00    | 18.88                      | 14.82      | 19.38                     | 20.78      |
| MT <sub>sc</sub>                    | 3.03                        | 4.48     | 4.39                       | 5.26       | 3.51                  | 4.62              | 2.96                       | 4.09     | 4.29                       | 5.59       | 1.35                      | 3.61       |

Notes. Miller et al. (2010): 73 19-yr old US military academy cadets in spring 2004 and fall 2003, RT<sub>wd</sub> 6:13 and 6:16, respectively; Shochat et al. (2019): 19 undergraduates of the University of Surrey after observing for, at least, three weeks DST and ST in late spring 2015 and late fall 2014, age 19 and 18.5 years, RT<sub>wd</sub> 8:44 and 8:53, respectively; Lo et al. (2014): University of Surrey students (in total, 837 with mean age 25 years), averaging over 5 roughly equal intervals of ST preceding and following 7 roughly equal intervals of DST, RT<sub>wd</sub> 7:41 and 7:48, respectively; Johnsen et al. (2013): 1064 52-yr and 1036 54-yr old employed residents of Tromsø in winter and fall 2007/2008, RT<sub>wd</sub> 6:39 and 6:36, respectively; Friborg et al. (2012): Universities of Tromsø students, in August 2009, the number of students dropped from 200 to 150 with ages 23 and 22.5 years after the first assessment in January 2009, RT<sub>wd</sub> 8:04 and 8:36, respectively; Lowden et al. (2019): 32 45.5-yr old office workers in northern Sweden, RT<sub>wd</sub> 5:32 and 5:53, respectively; #: DST clock times were corrected (ST=DST-1h) to provide direct comparison of sun times. See also notes to Table S3, averaging in Table S14 and summary in Tables S19 and S20.

**Table S14. Averaging over samples of early vs. late school start times and DST vs. ST.**

| Pairs of samples |            | School start times (Table S12) |      |       |      |           | Seasonal DST and ST (Table S13) |      |       |      |           |
|------------------|------------|--------------------------------|------|-------|------|-----------|---------------------------------|------|-------|------|-----------|
| Samples          |            | Early                          |      | Later |      | p for     | DST                             |      | ST    |      | p for     |
| Sleep time       |            | Mean                           | SEM  | Mean  | SEM  | $t_{1/8}$ | Mean                            | SEM  | Mean  | SEM  | $t_{1/5}$ |
| Bed-time         | Weekday    | 22.57                          | 0.33 | 23.62 | 0.22 | 0.015     | 22.83 <sup>#</sup>              | 0.20 | 23.82 | 0.24 | <0.001    |
|                  | Weekend    | 23.75                          | 0.38 | 24.00 | 0.51 | 0.211     | 23.47 <sup>#</sup>              | 0.32 | 24.74 | 0.21 | 0.001     |
|                  | Time-lag   | 1.19                           | 0.20 | 0.37  | 0.52 | 0.101     | 0.63                            | 0.24 | 0.92  | 0.10 | 0.295     |
| Rise-time        | Weekday    | 6.44                           | 0.09 | 8.18  | 0.32 | 0.002     | 6.14 <sup>#</sup>               | 0.50 | 7.35  | 0.51 | <0.001    |
|                  | Weekend    | 9.01                           | 0.49 | 9.28  | 0.44 | 0.058     | 7.72 <sup>#</sup>               | 0.49 | 9.01  | 0.34 | 0.001     |
|                  | Time-lag   | 2.56                           | 0.50 | 1.10  | 0.48 | 0.009     | 1.58                            | 0.14 | 1.66  | 0.27 | 0.714     |
| Time in Bed      | Weekday    | 7.88                           | 0.31 | 8.55  | 0.33 | 0.200     | 7.31                            | 0.47 | 7.53  | 0.44 | 0.129     |
|                  | Weekend    | 9.36                           | 0.24 | 9.49  | 0.24 | 0.407     | 8.26                            | 0.26 | 8.27  | 0.22 | 0.910     |
|                  | Shortening | 1.48                           | 0.40 | 0.93  | 0.27 | 0.389     | 0.95                            | 0.26 | 0.75  | 0.26 | 0.422     |
| Average          |            | 8.31                           | 0.23 | 8.82  | 0.28 | 0.138     | 7.58                            | 0.41 | 7.74  | 0.38 | 0.066     |
| Sleep loss       |            | 23.65                          | 4.21 | 9.89  | 4.31 | 0.006     | 18.07                           | 1.96 | 18.34 | 3.30 | 0.887     |
| MT <sub>sc</sub> |            | 3.90                           | 0.30 | 4.41  | 0.54 | 0.131     | 3.26 <sup>#</sup>               | 0.45 | 4.61  | 0.30 | 0.001     |

Notes. Left and right part: Results of averaging over 9 and 6 pairs of samples (see Tables S12

and S13), respectively; p for  $t_{1/8}$  and p for  $t_{1/5}$ : p-value from paired t-test (9 and 6 paired samples

of early vs. later school start times and DST vs. ST); #: In DST vs. ST studies, clock times for

DST were corrected to clock times for ST (ST = DST - 1h). See also notes to Table S3 and

summaries in Tables S18-S20.

**Table S15. Holidays, perennial DST and leaving school in “natural experiments”.**

| Sleep<br>time     | Reference<br>Division<br>Samples | Warner et al      |          | Borisenkov et al   |       | Urner et al |       | Lund et al |       |
|-------------------|----------------------------------|-------------------|----------|--------------------|-------|-------------|-------|------------|-------|
|                   |                                  | School & Holydays | Holydays | Perennial<br>DST   | ST    | Age<br>18   | 23    | Age<br>17  | 20    |
| Bed-<br>time      | Weekday                          | 22.78             | 24.00    | 23.10 <sup>#</sup> | 23.89 | 23.40       | 24.03 | 23.03      | 24.28 |
|                   | Weekend                          | 24.40             | 24.77    | 24.47 <sup>#</sup> | 24.85 | 24.78       | 25.27 | 24.75      | 25.73 |
|                   | Time-lag                         | 1.62              | 0.77     | 1.37               | 0.96  | 1.38        | 1.23  | 1.72       | 1.45  |
| Rise-<br>time     | Weekday                          | 7.07              | 9.63     | 6.09 <sup>#</sup>  | 7.05  | 6.90        | 7.77  | 6.52       | 8.03  |
|                   | Weekend                          | 9.37              | 10.07    | 10.11 <sup>#</sup> | 10.27 | 9.53        | 9.80  | 9.85       | 10.13 |
|                   | Time-lag                         | 2.30              | 0.43     | 4.02               | 3.22  | 2.63        | 2.03  | 3.33       | 2.10  |
| Time<br>in<br>Bed | Weekday                          | 8.28              | 9.63     | 6.99               | 7.16  | 7.49        | 7.79  | 7.48       | 7.75  |
|                   | Weekend                          | 8.97              | 9.30     | 9.64               | 9.42  | 8.75        | 8.52  | 9.10       | 8.40  |
|                   | Shortening                       | 0.68              | -0.33    | 2.65               | 2.26  | 1.26        | 0.73  | 1.62       | 0.65  |
|                   | Average                          | 8.48              | 9.54     | 7.75               | 7.81  | 7.85        | 8.00  | 7.95       | 7.94  |
|                   | Sleep loss                       | 21.73             | 4.30     | 36.51              | 31.02 | 25.96       | 20.78 | 30.82      | 21.32 |
| MT <sub>sc</sub>  |                                  | 4.64              | 5.54     | 4.34               | 4.75  | 4.71        | 5.27  | 4.72       | 5.70  |

Notes. Warner et al. (2008): 380 Australian students on Holidays and, later, 310 of them at school when the classes started at 08:30 (mean age 16 years), RT<sub>wd</sub> 07:04 and 09:38 for School and Holidays, respectively; Borisenkov et al. (2016): 3033 16-yr and 2436 17-yr students observing perennial (year round) DST and perennial ST in northern regions of Russia, between March 2011 and October 2014 and thereafter, RT<sub>wd</sub> 7.09 and 7.05, respectively; #: Clock times for DST were corrected (DST-1h) to provide direct comparison of the sun times under DST and ST; Urner et al. (2009): 24 Australian students were first studied at high school and then at university, ages 18 and 23 years, RT<sub>wd</sub> 06:54 and 07:46, respectively; Lund et al. (2010): Comparison of 199 17-yr school students of the highest (12<sup>th</sup>) grade from the US pole (National Sleep Foundation. 2006) with 1125 20-yr college students, RT<sub>wd</sub> 06:54 and 07:46, respectively. See also notes to Table S3 and summaries in Tables S18-S20.



**Table S16. Summary on comparisons of samples sorted into 4 subsets.**

| Subdivision into two subsets |                       | RT <sub>wd</sub> < 7:00 |      |      |        |        |      |      |
|------------------------------|-----------------------|-------------------------|------|------|--------|--------|------|------|
| Sleep time                   | Subset                | RT <sub>wd</sub> < 7:00 | RTL  |      | MTL    |        | BTL  |      |
|                              |                       |                         | < 2h | > 2h | < 1.5h | > 1.5h | < 1h | > 1h |
| Bed-time                     | Weekday               | ↓***                    | ↓*** | ↓*** | ↓***   | ↓***   | ↓*** | ↓*** |
|                              | Weekend               | ↓***                    | ↓*** | ↓*** | ↓***   | ↓***   | ↓*** | ↓*** |
|                              | Time-lag in minutes   | ↑≈                      | ↓≈   | ↑≈   | ↓≈     | ↑≈     | ↓≈   | ↑≈   |
|                              |                       | 2                       | -4   | 7    | -4     | 2      | -10  | 5    |
| Rise-time                    | Weekday               | ↓***                    | ↓*** | ↓*** | ↓***   | ↓***   | ↓*** | ↓*** |
|                              | Weekend               | ↓***                    | ↓*** | ↓*** | ↓***   | ↓***   | ↓*** | ↓*** |
|                              | in minutes            | -40                     | -47  | -42  | -51    | -53    | -42  | -47  |
|                              | Time-lag in minutes   | ↑*                      | ↑*   | ↑*   | ↑≈     | ↑≈     | ↓**  | ↓**  |
|                              |                       | 12                      | 10   | 15   | 7      | 1      | 18   | 10   |
| Time in Bed                  | Weekday               | ↓***                    | ↓*** | ↓*** | ↓***   | ↓***   | ↓*** | ↓*** |
|                              | in minutes            | -26                     | -27  | -27  | -30    | -23    | -34  | -28  |
|                              | Weekend               | ↓***                    | ↓**  | ↓**  | ↓***   | ↓***   | ↓**  | ↓**  |
|                              | in minutes            | -16                     | -14  | -20  | -20    | -23    | -6   | -23  |
|                              | Shortening in minutes | ↑*                      | ↑+   | ↑+   | ↑≈     | ↓≈     | ↑**  | ↑**  |
|                              |                       | 10                      | 13   | 7    | 10     | -1     | 28   | 5    |
|                              | Average               | ↓***                    | ↓*** | ↓*** | ↓***   | ↓***   | ↓*** | ↓*** |
|                              | in minutes            | -23                     | -23  | -25  | -27    | -23    | -26  | -26  |
|                              | % to mean             | -5%                     | -5%  | -5%  | -5%    | -5%    | -5%  | -5%  |
|                              | Sleep loss in %       | ↑**                     | ↑**  | ↑**  | ↑*     | ↑*     | ↑*** | ↑*** |
|                              |                       | 2%                      | 2%   | 3%   | 2%     | 1%     | 4%   | 2%   |
| MT <sub>sc</sub>             |                       | ↓***                    | ↓*** | ↓*** | ↓***   | ↓***   | ↓*** | ↓*** |

Notes. Subdivision into two subsets: The whole set of samples was divided into two subsets and the subset with earlier weekend sleep timing, RT<sub>wd</sub>: < 7:00, was compared with another subset. Moreover, the subsets were further subdivided into two smaller subsets with either smaller or larger time-lag and also compared (Tables S7-S9). See subset sizes in Table S2, notes to Tables 3 and S3, and Figure 4.

**Table S17. Summary on comparisons of samples sorted into 4 subsets and two ages.**

| Subdivision into two subsets |            | RT <sub>wd</sub> <7:00 |                  |       |                  |       | Age     |
|------------------------------|------------|------------------------|------------------|-------|------------------|-------|---------|
| Sleep time                   | Subset     | RT <sub>wd</sub>       | RT <sub>we</sub> |       | MT <sub>sc</sub> |       | 16+ 18+ |
|                              |            | <7:00                  | <9:00            | >9:00 | <4:00            | >4:00 | 16+     |
| Bed-time                     | Weekday    | ↓***                   | ↓~               | ↓~    | ↓+               | ↓+    | ↓**     |
|                              | Weekend    | ↓***                   | ↑~               | ↑~    | ↓~               | ↓~    | ↓*      |
|                              | Time-lag   | ↑~                     | ↑+               | ↑+    | ↑~               | ↑~    | ↑~      |
|                              | in minutes | 2                      | 20               | 10    | 11               | 5     | 12      |
| Rise-time                    | Weekday    | ↓***                   | ↓***             | ↓***  | ↓***             | ↓***  | ↓***    |
|                              | Weekend    | ↓***                   | ↓~               | ↓~    | ↓*               | ↓*    | ↑+      |
|                              | in minutes | -40                    | -7               | -12   | -10              | -34   | 19      |
|                              | Time-lag   | ↑*                     | ↑***             | ↑***  | ↑*               | ↑*    | ↑***    |
|                              | in minutes | 12                     | 49               | 38    | 39               | 23    | 64      |
| Time in Bed                  | Weekday    | ↓***                   | ↓***             | ↓***  | ↓***             | ↓***  | ↓~      |
|                              | in minutes | -26                    | -40              | -41   | -28              | -43   | -12     |
|                              | Weekend    | ↓***                   | ↓~               | ↓~    | ↓~               | ↓~    | ↑***    |
|                              | in minutes | -16                    | -11              | -14   | 1                | -25   | 40      |
|                              | Shortening | ↑*                     | ↑**              | ↑**   | ↑*               | ↑*    | ↑***    |
|                              | in minutes | 10                     | 29               | 28    | 28               | 18    | 53      |
|                              | Average    | ↓***                   | ↓***             | ↓***  | ↓**              | ↓**   | ↑~      |
|                              | in minutes | -23                    | -31              | -34   | -20              | -37   | 3       |
|                              | % to mean  | -5%                    | -6%              | -7%   | -4%              | -8%   | 1%      |
|                              | Sleep loss | ↑**                    | ↑***             | ↑***  | ↑**              | ↑**   | ↑***    |
|                              | in %       | 2%                     | 9%               | 7%    | 7%               | 5%    | 8%      |
| MT <sub>sc</sub>             |            | ↓***                   | ↓+               | ↓+    | ↓**              | ↓**   | ↓***    |

Notes. Subdivision into two subsets: Either the whole set of samples was divided into two subsets and the subset with earlier weekend sleep timing, RT<sub>wd</sub>:<7:00, was compared with another subset (the same as in Table S16). Moreover, after further subdivision into two smaller subsets, with earlier and later weekend sleep timing (Tables S10 and S11), these subsets were compared. 16+ 18+: Two of 8 ages, ages 16+ (16.5-18.0 years) and 18+ (18.5-23.0 years), n = 31 and 41, respectively (Table S6, right). See also subset sizes in Table S2 and notes to Tables 3 and S16.

**Table S18. Summary on comparison of school start times.**

| Subdivision<br>Age     | Early vs. later school start times |      |      |      |     |      |     |      |      | Mean<br>30.5 | Holydays<br>16 |
|------------------------|------------------------------------|------|------|------|-----|------|-----|------|------|--------------|----------------|
|                        | 15.5                               | 14   | 14   | 13   | 14  | 12.5 | 20  | 12.5 | 12.5 |              |                |
| Weekday                | ↓                                  | ↓    | ↓    | ↓    | ↓   | ↓    | ↓   | ↓    | ↓    | ↓*           | ↓              |
| Weekend                | ↓                                  | ↓    | ↓    | ↓    | ↓   | ↑    | ↓   | ↓    | ↓    | ↓≈           | ↓              |
| Time-lag<br>in minutes | ↑                                  | ↑    | ↑    | ↑    | ↓   | ↑    | ↑   | ↑    | ↑    | ↑≈           | ↑              |
|                        | -1                                 | 24   | 31   | 37   | -5  | 24   | -18 | 113  | 233  | 49           | 51             |
| Weekday                | ↓                                  | ↓    | ↓    | ↓    | ↓   | ↓    | ↓   | ↓    | ↓    | ↓**          | ↓              |
| Weekend                | ↓                                  | ↓    | ↑    | ↓    | ↓   | ↑    | ↓   | ↓    | ↓    | ↓+           | ↓              |
| in minutes             | -10                                | -28  | 10   | -13  | -2  | 3    | -42 | -57  | -8   | -16          | -42            |
| Time-lag<br>in minutes | ↑                                  | ↑    | ↑    | ↑    | ↑   | ↑    | ↑   | ↑    | ↑    | ↑**          | ↑              |
|                        | 17                                 | 170  | 219  | 106  | 22  | 149  | 30  | 25   | 50   | 88           | 112            |
| Weekday                | ↓                                  | ↓    | ↓    | ↓    | ↓   | ↓    | ↓   | ↑    | ↑    | ↓≈           | ↓              |
| in minutes             | -16                                | -132 | -118 | -77  | -28 | -127 | -34 | 40   | 130  | -40          | -81            |
| Weekend                | ↑                                  | ↑    | ↑    | ↓    | ↓   | ↓    | ↑   | ↓    | ↓    | ↓≈           | ↓              |
| in minutes             | 3                                  | 14   | 14   | -8   | -1  | -2   | 14  | -48  | -53  | -8           | -20            |
| Shortening             | ↑                                  | ↑    | ↑    | ↑    | ↑   | ↑    | ↑   | ↓    | ↓    | ↑≈           | ↑              |
| in minutes             | 19                                 | 146  | 132  | 70   | 27  | 125  | 48  | -88  | -183 | 33           | 61             |
| Average                | ↓                                  | ↓    | ↓    | ↓    | ↓   | ↓    | ↓   | ↑    | ↑    | ↓≈           | ↓              |
| in minutes             | -10                                | -90  | -80  | -58  | -20 | -91  | -20 | 15   | 78   | -31          | -64            |
| % to mean              | -2%                                | -17% | -15% | -11% | -4% | -16% | -5% | 3%   | 15%  | -6%          | -12%           |
| Sleep loss             | ↑                                  | ↑    | ↑    | ↑    | ↑   | ↑    | ↑   | ↑    | ↑    | ↑**          | ↑              |
| in %                   | 2%                                 | 24%  | 35%  | 16%  | 4%  | 22%  | 6%  | 5%   | 10%  | 14%          | 17%            |
| MT <sub>sc</sub>       | ↓                                  | ↓    | ↓    | ↓    | ↓   | ↓    | ↓   | ↓    | ↑    | ↓≈           | ↓              |

Notes. Age: Mean age in one of samples/subsets. Early vs. later school start times: Summary on

9 pairs of samples (Swiss students, Mexican adolescents – two publications, school students in southern Brazil, US students, other students from southern Brazil, medical students in northern Brazil, other students, with and without electricity at home, in southern Brazil); Mean: Averaged over 9 pairs; Holydays: The 10<sup>th</sup> pair of samples shown in Table S15; ↑ or ↓ or =: Value in the sample characterized by early wakeups was either higher or lower or the same as in another sample with later wakeups; in minutes: This difference between samples was additionally shown in minutes, (-) indicates earlier Risettime on Weekends, smaller sleep restriction due to a smaller Bed- and Risettime-lags and Shortening, and shorter sleep due to shorter Weekday, Weekend and Average Time in Bed; % to mean: The same difference expressed in percentage to mean Average calculated for two samples; in %: The difference in actual Sleep loss measured in percentage, (-) indicates smaller loss. Level of significance for Mean is taken from Table S16. See also notes to Tables 3 and Table S20.

Table S19. Summary on DST-ST comparison.

| Sleep time       | Subdivision | Seasonal DST vs. ST |      |      |      |      |       | Mean           | Perennial |
|------------------|-------------|---------------------|------|------|------|------|-------|----------------|-----------|
|                  | Age         | 19                  | 19   | 25   | 52   | 22.5 | 45.5  | 30.5           | 16        |
| Bed-time         | Weekday     | ↓#                  | ↓#   | ↓#   | ↓#   | ↓#   | ↓#    | ↓#***          | ↓#        |
|                  | Weekend     | ↓#                  | ↓#   | ↓#   | ↓#   | ↓#   | ↓#    | ↓#**           | ↓#        |
|                  | Time-lag    | ↓                   | ↑    | ↑    | ↓    | =    | ↓     | ↓≈             | ↑         |
|                  | in minutes  | -22                 | 9    | 2    | -4   | 0    | -87   | -17            | 25        |
| Rise-time        | Weekday     | ↓#                  | ↓#   | ↓#   | ↓#   | ↓#   | ↓#    | ↓#***          | ↓#        |
|                  | Weekend     | ↓#                  | ↓#   | ↓#   | ↓#   | ↓#   | ↓#    | ↓#**           | ↓#        |
|                  | in minutes  | -100#               | -31# | -74# | -91# | -66# | -101# | -77#           | -10#      |
|                  | Time-lag    | ↓                   | ↑    | ↓    | ↓    | ↑    | ↓     | ↓≈             | ↑         |
|                  | in minutes  | -37                 | 38   | -7   | -28  | 26   | -20   | -5             | 48        |
| Time in Bed      | Weekday     | ↓                   | ↓    | =    | ↓    | ↓    | ↓     | ↓≈             | ↓         |
|                  | in minutes  | -1                  | -7   | 0    | -5   | -20  | -46   | -13            | -10       |
|                  | Weekend     | ↓                   | ↑    | ↓    | ↓    | ↑    | ↑     | ↓≈             | ↑         |
|                  | in minutes  | -16                 | 22   | -9   | -29  | 6    | 21    | -1             | 13        |
|                  | Shortening  | ↓                   | ↑    | ↓    | ↓    | ↑    | ↑     | ↑≈             | ↑         |
|                  | in minutes  | -15                 | 29   | -9   | -24  | 26   | 67    | 12             | 23        |
|                  | Average     | ↓                   | ↑    | ↓    | ↓    | ↓    | ↓     | ↓ <sup>+</sup> | ↓         |
|                  | in minutes  | -5                  | 1    | -2   | -11  | -13  | -27   | -10            | -4        |
| % to mean        | -1%         | 0%                  | 0%   | -3%  | -2%  | -7%  | -2%   | -1%            |           |
| Sleep loss       | in %        | ↓                   | ↑    | ↓    | ↓    | ↑    | ↓     | ↓≈             | ↑         |
|                  |             | -5%                 | 6%   | -1%  | -4%  | 4%   | -1%   | 0%             | 5%        |
| MT <sub>sc</sub> |             | ↓                   | ↓    | ↓    | ↓    | ↓    | ↓     | ↓              | ↓**       |

Notes. Age: Mean age in one of two samples/subsets. Seasonal DST vs. ST: Seasonal alternations between DST and ST, summary on 6 pairs of samples in Table S14 (US military academy cadets, undergraduates from the University of Surrey, University of Surrey students, employed residents of Tromsø, Universities of Tromsø students, and office workers in northern Sweden); Mean: Averaged over 6 pairs in Table S15; Perennial: Year round DST vs. year round ST (Table S16); #: Clock times for DST were corrected (DST-1h). Level of significance for Mean was taken from Table S16. See also notes to Tables 3 and Table S20.

**Table 20. Summary on “natural experiments”.**

| Sleep time       | Subdivision<br>One | In vs. after school  |     |     | School start times |          | DST and ST |           |
|------------------|--------------------|----------------------|-----|-----|--------------------|----------|------------|-----------|
|                  |                    | Age at school, years |     |     | Early vs.          |          | DST vs. ST |           |
|                  |                    | 16+                  | 18  | 17  | Later              | Holydays | Seasonal   | Perennial |
| Bed-time         | Weekday            | ↓**                  | ↓   | ↓   | ↓*                 | ↓        | ↓****      | ↓#        |
|                  | Weekend            | ↓*                   | ↓   | ↓   | ↓~                 | ↓        | ↓***       | ↓#        |
|                  | Time-lag           | ↑~                   | ↑   | ↑   | ↑~                 | ↑        | ↓~         | ↑         |
|                  | in minutes         | 12                   | 9   | 16  | 49                 | 51       | -17        | 25        |
| Rise-time        | Weekday            | ↓***                 | ↓   | ↓   | ↓**                | ↓        | ↓****      | ↓#        |
|                  | Weekend            | ↑+                   | ↓   | ↓   | ↓+                 | ↓        | ↓***       | ↓#        |
|                  | in minutes         | 19                   | -16 | -17 | -16                | -42      | -77#       | -10#      |
|                  | Time-lag           | ↑***                 | ↑   | ↑   | ↑**                | ↑        | ↓~         | ↑         |
|                  | in minutes         | 64                   | 36  | 74  | 88                 | 112      | -5         | 48        |
| Time in Bed      | Weekday            | ↓~                   | ↓   | ↓   | ↓~                 | ↓        | ↓~         | ↓         |
|                  | in minutes         | -12                  | -18 | -16 | -40                | -81      | -13        | -10       |
|                  | Weekend            | ↑***                 | ↑   | ↑   | ↓~                 | ↓        | ↓~         | ↑         |
|                  | in minutes         | 40                   | 14  | 42  | -8                 | -20      | -1         | 13        |
|                  | Shortening         | ↑***                 | ↑   | ↑   | ↑~                 | ↑        | ↑~         | ↑         |
|                  | in minutes         | 53                   | 32  | 58  | 33                 | 61       | 12         | 23        |
|                  | Average            | ↑~                   | ↓   | ↑   | ↓~                 | ↓        | ↓+         | ↓         |
|                  | in minutes         | 3                    | -9  | 1   | -31                | -64      | -10        | -4        |
|                  | % to mean          | 1%                   | -2% | 0%  | -6%                | -12%     | -2%        | -1%       |
|                  | Sleep loss         | ↑***                 | ↑   | ↑   | ↑**                | ↑        | ↓~         | ↑         |
|                  | in %               | 8%                   | 5%  | 10% | 14%                | 17%      | 0%         | 5%        |
| MT <sub>sc</sub> |                    | ↓***                 | ↓   | ↓   | ↓~                 | ↓        | ↓**        | ↓         |

Notes. Subdivision: Subdivision into samples/subsets. One: One of samples/subsets. In vs. after school: Early wakeups when being in school age compared to university/college age (16+: The same column as in Table S17 (right) for comparison with samples from two separate studies, 18: 24 students at high school and, thereafter, university, ages 18 and 23 years, respectively, and 17: School students of the highest (12<sup>th</sup>) grade compared to college students, ages 17 and 20 years, respectively, Table S15); School start times: Early vs. Later School start times (comparison with Later times or Holydays: averaging over 9 comparisons in Table S14, and the 10<sup>th</sup> study comparing Early school times with Holidays (Table S15) rather than with Later school start times; DST vs. ST: Seasonal and Perennial (averaged over 6 comparisons of seasonal alternations between DST and ST from Table S14 plus one study on year round DST and year round ST, Table S15); #: Clock times were corrected for DST (-1h). See also notes to Tables 3 and Tables S18 and S19.

**Supplementary References**

Arrona-Palacios A, Díaz-Morales JF. Morningness-eveningness is not associated with academic performance in the afternoon school shift: Preliminary findings. *Br J Educ Psychol.* 2018;88(3):480-498.

Arrona-Palacios A, García A, Valdez P. Sleep-wake habits and circadian preference in Mexican secondary school. *Sleep Med.* 2015;16(10):1259-64.

Boergers J, Gable CJ, Owens JA. Later school start time is associated with improved sleep and daytime functioning in adolescents. *J Dev Behav Pediatr.* 2014;35(1):11-7.

Borisenkov MF, Tserne TA, Panev AS, Petrova N.B., Timonin V.D., Kolomeichuk S.N., Vinogradova I.A., Kovyazina M.S., Khokhlov N.A., Kosova A.L., Kasyanova O.N. Seven-year survey of sleep timing in Russian children and adolescents: chronic 1-h forward transition of social clock is associated with increased social jetlag and winter pattern of mood seasonality. *Biol Rhythm Res* 2016;48:3-12.

Brandalize M, Pereira RF, Leite N, Filho GL, Louzada FM. Effect of morning school schedule on sleep and anthropometric variables in adolescents: a follow-up study. *Chronobiol Int.* 2011 Nov;28(9):779-85.

Carissimi A, Dresch F, Martins AC, Levandovski RM, Adan A, Natale V, Martoni M, Hidalgo MP. The influence of school time on sleep patterns of children and adolescents. *Sleep Med.* 2016;19:33-9.

Friborg O, Bjorvatn B, Amponsah B, Pallesen S. Associations between seasonal variations in day length (photoperiod), sleep timing, sleep quality and mood: a comparison between Ghana (5°) and Norway (69°). *J Sleep Res.* 2012;21(2):176-84.

Jankowski KS, Vollmer C, Linke M, Randler C. Differences in sun time within the same time zone affect sleep–wake and social rhythms, but not morningness preference: Findings from a Polish–German comparison study. *Time & Society* 2014;23(2):258-76.

- Johnsen MT, Wynn R, Allebrandt K, Bratlid T. Lack of major seasonal variations in self reported sleep-wake rhythms and chronotypes among middle aged and older people at 69 degrees North: the Tromsø Study. *Sleep Med.* 2013;14(2):140-8.
- Lo JC, Leong RL, Loh KK, Dijk DJ, Chee MW. Young Adults' Sleep Duration on Work Days: Differences between East and West. *Front Neurol.* 2014;5:81.
- Lowden A, Lemos N, Gonçalves B, Öztürk G, Louzada F, Pedrazzoli M, Moreno KL. Delayed Sleep in Winter Related to Natural Daylight Exposure among Arctic Day Workers. *Clocks & Sleep* 2018;1(1), 105-116.
- Lund HG, Reider BD, Whiting AB, Prichard JR. Sleep patterns and predictors of disturbed sleep in a large population of college students. *J Adolesc Health.* 2010;46(2):124-32.
- Miller NL, Shattuck LG, Matsangas P. Longitudinal study of sleep patterns of United States Military Academy cadets. *Sleep* 2010;33(12):1623-1631.
- National Sleep Foundation. 2006 Sleep in America Poll Summary Findings. Available (18 November, 2019) at [https://www.sleepfoundation.org/sites/default/files/inlinefiles/2006\\_summary\\_of\\_findings.pdf](https://www.sleepfoundation.org/sites/default/files/inlinefiles/2006_summary_of_findings.pdf)
- Perkinson-Gloor N, Lemola S, Grob A. Sleep duration, positive attitude toward life, and academic achievement: the role of daytime tiredness, behavioral persistence, and school start times. *J Adolesc.* 2013;36(2):311-8.
- Peixoto CA, da Silva AG, Carskadon MA, Louzada FM. Adolescents living in homes without electric lighting have earlier sleep times. *Behav Sleep Med.* 2009;7(2):73-80.
- Shochat T, Santhi N, Herer P, Flavell SA, Skeldon AC and Dijk D-J (2019) Sleep Timing in Late Autumn and Late Spring Associates With Light Exposure Rather Than Sun Time in College Students. *Front. Neurosci.* 13:882.

1  
2  
3  
4  
5  
6  
7  
8  
9  
10  
11  
12  
13  
14  
15  
16  
17  
18  
19  
20  
21  
22  
23  
24  
25  
26  
27  
28  
29  
30  
31  
32  
33  
34  
35  
36  
37  
38  
39  
40  
41  
42  
43  
44  
45  
46  
47  
48  
49  
50  
51  
52  
53  
54  
55  
56  
57  
58  
59  
60

Urner M, Tornic J, Bloch KE. Sleep patterns in high school and university students:  
a longitudinal study. *Chronobiol Int.* 2009;26(6):1222-34.

Warner S, Murray G, Meyer D. Holiday and school-term sleep patterns of Australian  
adolescents. *J Adolesc* 2008;31:595–608.

For Peer Review Only



## Supplementary Figure Legends

### Figure S1. Age by M-E-type difference in time in bed.

Lines illustrate a linear relationship of Age with the difference in weekly average and weekday times in bed (A and B, respectively). Labels refer to 8 ages. See also Figure 3 (right graphs).

### Figure S2. Sleep loss and time in bed in two-subset divisions in accord with risetime and time lags.

Three subdivisions of the whole set of 320 samples, depending upon  $RT_{wd}$  (weekday Risettime) and Bed- and Risettime-lags (BLT and RLT). See also legend to Figure 3, notes to Table 1, and mean (averaged over ages) sleep times in Tables 1 and S5.

### Figure S3. Bed- and Risettime-lags in six two-subset divisions.

A and C, B and D. Bed- and Risettime-lags are the weekend-weekday differences in Bed- and Risettimes, respectively (Figure 1A and 1C). The same subdivision of samples as in Figures 3 and S2. See also notes in Table 1 and mean (averaged over ages) sleep times in Tables 1, 2 and S4-S6.

### Figure S4. Bed- and Risettimes in six two-subset divisions.

A and C. Bedtime. B and D. Risettime. The same subdivisions of samples as in Figures S3. See also notes in Table 1 and mean (averaged over ages) sleep times in Tables 1, 2 and S4-S6.

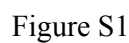

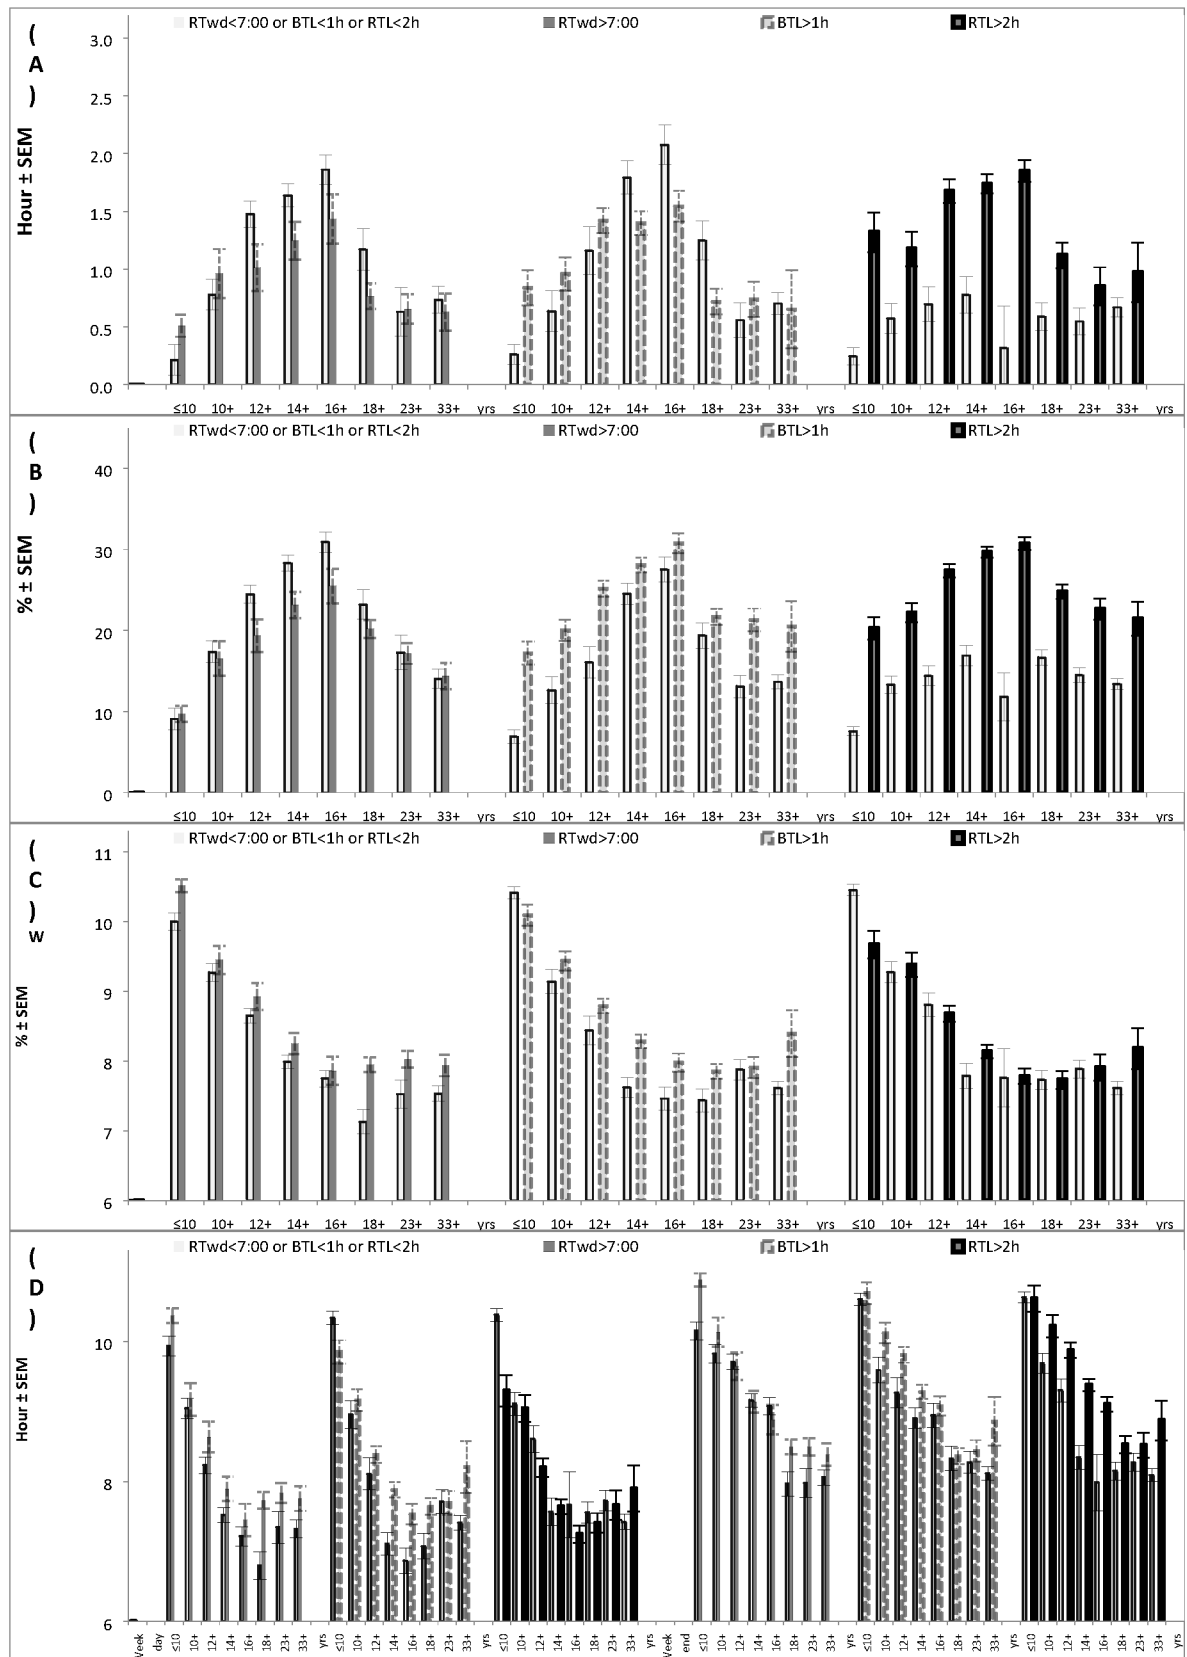

Figure S2

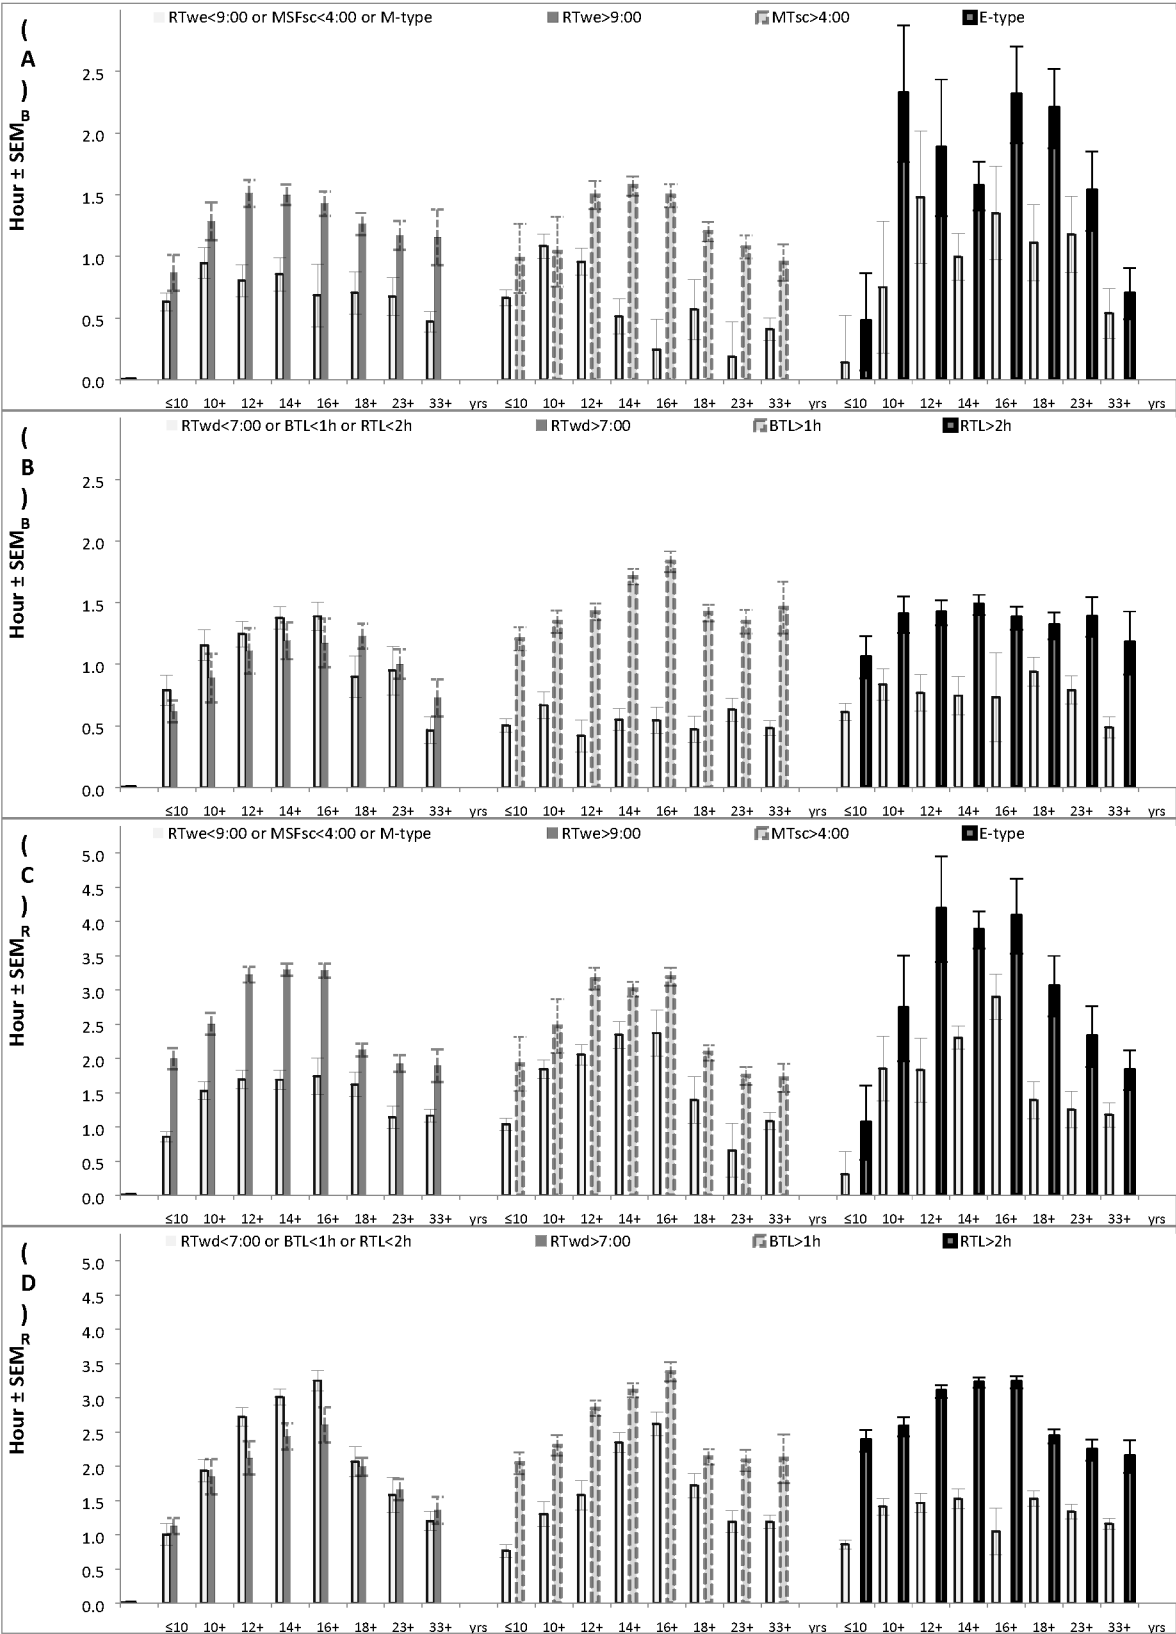

Figure S3

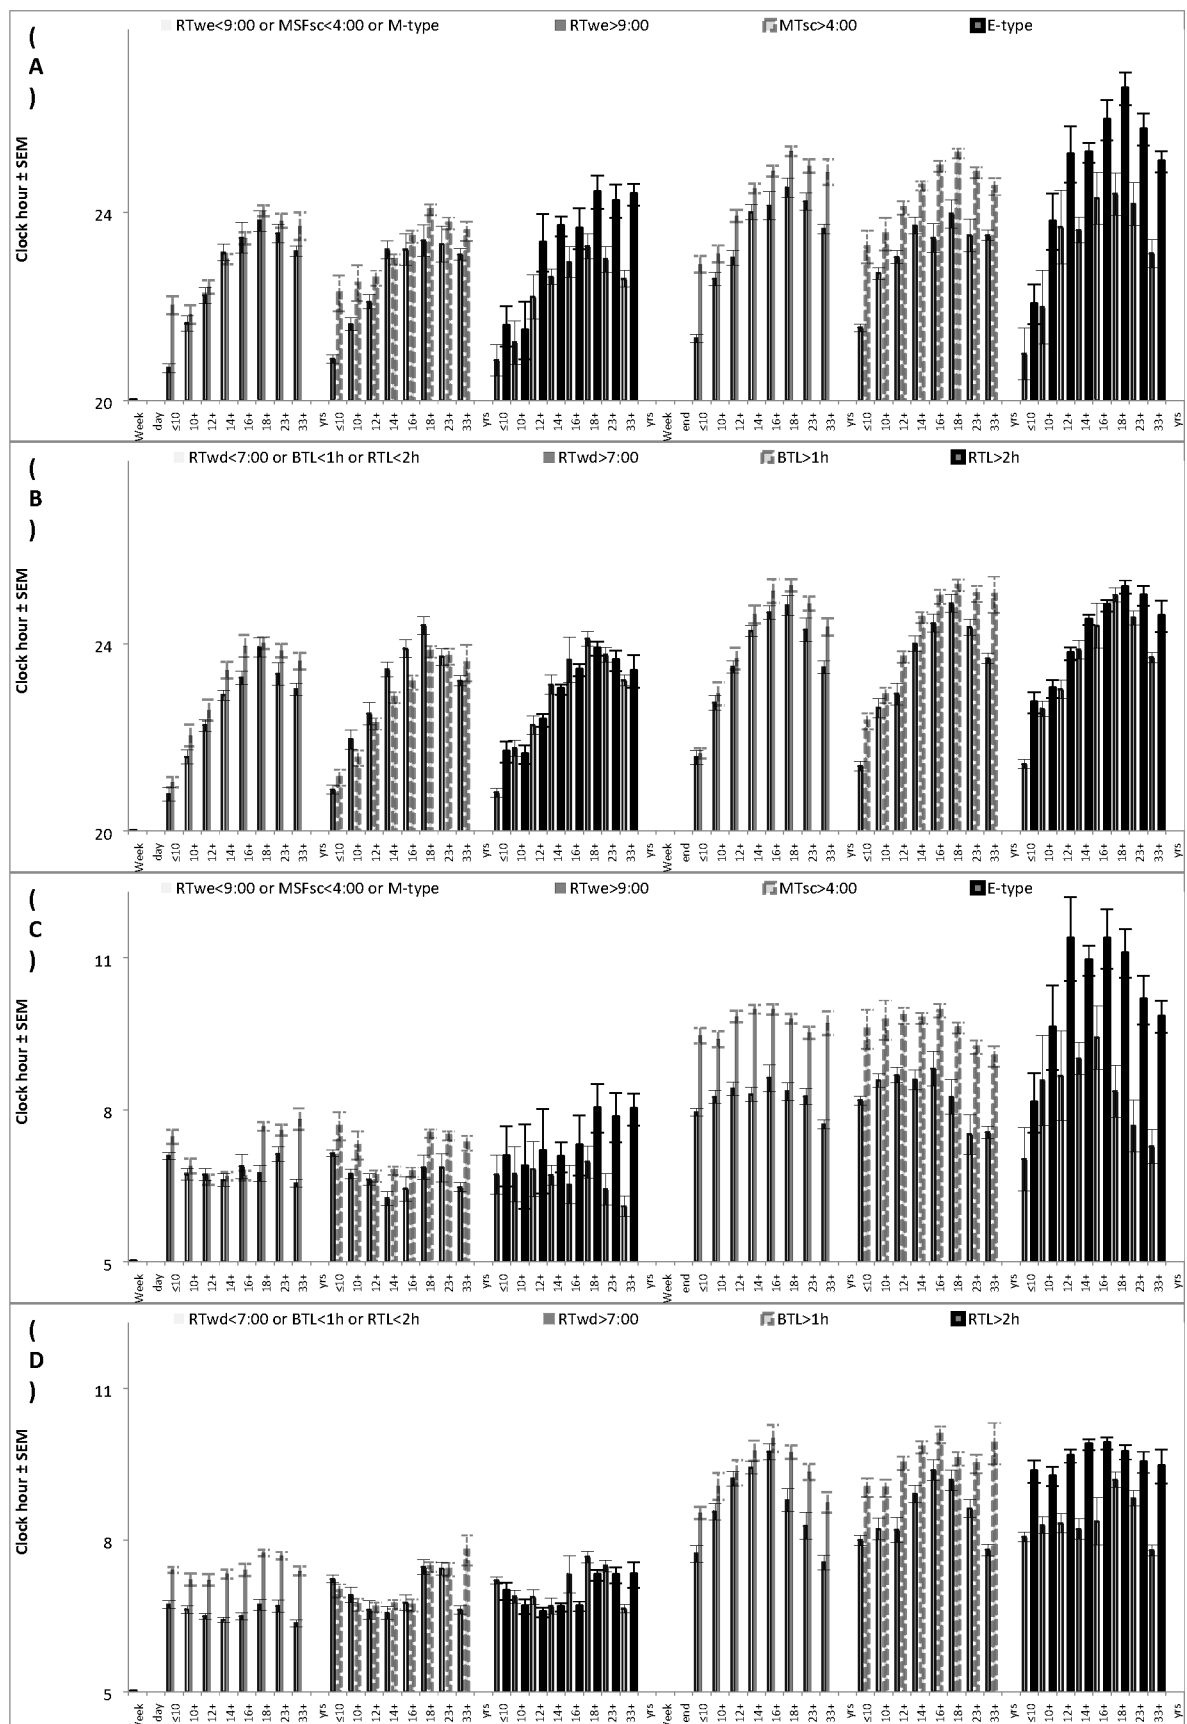

Figure S4

**Supplementary2\_320samples to****Evening chronotype, late weekend sleep times and social jetlag as possible causes of sleep cur**

| Sample # | Time wher collected | Weekdays BT | Weekdays RT | Weekends BT | Weekends RT | Published in Author(s) | Year | Mean age | Country     | Note # |
|----------|---------------------|-------------|-------------|-------------|-------------|------------------------|------|----------|-------------|--------|
| 201      | 2                   | 19.97       | 7.32        | 20.03       | 7.45        | Randler et al.         | 2019 | 0.0      | Germany     |        |
| 1        | 1                   | 20.12       | 7.25        | 20.17       | 7.37        | Randler et al          | 2012 | 0.5      | Germany     |        |
| 2        | 1                   | 19.90       | 7.15        | 20.07       | 7.37        | Randler et al          | 2012 | 1.0      | Germany     |        |
| 202      | 2                   | 19.75       | 7.13        | 19.95       | 7.42        | Randler et al.         | 2019 | 1.0      | Germany     |        |
| 3        | 1                   | 21.40       | 8.10        | 21.50       | 8.50        | Thorleifsdottir et al  | 2002 | 1.5      | Iceland     | 5      |
| 4        | 1                   | 20.13       | 7.20        | 20.42       | 7.53        | Randler et al          | 2012 | 2.0      | Germany     |        |
| 203      | 2                   | 19.95       | 7.10        | 20.23       | 7.57        | Randler et al.         | 2019 | 2.0      | Germany     |        |
| 5        | 1                   | 21.10       | 8.30        | 21.60       | 8.75        | Thorleifsdottir et al  | 2002 | 2.5      | Iceland     | 5      |
| 6        | 1                   | 19.90       | 7.13        | 20.23       | 7.48        | Randler et al          | 2012 | 3.0      | Germany     |        |
| 204      | 2                   | 19.73       | 7.03        | 20.12       | 7.52        | Randler et al.         | 2019 | 3.0      | Germany     |        |
| 7        | 1                   | 19.85       | 7.08        | 20.33       | 7.47        | Randler et al          | 2012 | 4.0      | Germany     |        |
| 8        | 1                   | 20.02       | 6.88        | 20.63       | 7.37        | Touchette et al        | 2008 | 4.0      | Canada      |        |
| 9        | 1                   | 21.16       | 6.95        | 21.46       | 7.53        | Doi et al              | 2016 | 4.0      | Japan       | 4      |
| 191      | 2                   | 21.27       | 6.85        | 21.58       | 7.64        | Fukuda et al.          | 2019 | 4.0      | Japan       | 4      |
| 205      | 2                   | 19.83       | 7.08        | 20.35       | 7.70        | Randler et al.         | 2019 | 4.0      | Germany     |        |
| 308      | 2                   | 21.70       | 7.82        | 21.18       | 8.85        | Clara, Gomes           | 2019 | 4.0      | Portugal    |        |
| 10       | 1                   | 21.80       | 8.45        | 22.15       | 8.98        | Thorleifsdottir et al  | 2002 | 4.5      | Iceland     | 5      |
| 11       | 1                   | 21.60       | 7.10        | 22.00       | 9.20        | Mishra et al           | 2017 | 4.5      | India       |        |
| 12       | 1                   | 19.88       | 7.18        | 20.45       | 7.57        | Randler et al          | 2012 | 5.0      | Germany     |        |
| 13       | 1                   | 20.00       | 6.87        | 20.72       | 7.48        | Touchette et al        | 2008 | 5.0      | Canada      |        |
| 206      | 2                   | 19.93       | 7.08        | 20.52       | 7.80        | Randler et al.         | 2019 | 5.0      | Germany     |        |
| 309      | 2                   | 21.75       | 7.75        | 22.32       | 8.87        | Clara, Gomes           | 2019 | 5.0      | Portugal    |        |
| 279      | 2                   | 20.32       | 7.03        | 21.08       | 7.73        | Stoner et al.          | 2018 | 5.5      | New Zealand |        |
| 14       | 1                   | 20.26       | 7.04        | 21.36       | 8.56        | Spruyt et al           | 2005 | 6.0      | Belgium     |        |
| 15       | 1                   | 19.75       | 6.78        | 20.48       | 7.42        | Randler et al          | 2012 | 6.0      | Germany     |        |
| 16       | 1                   | 19.83       | 6.70        | 20.73       | 7.43        | Touchette et al        | 2008 | 6.0      | Canada      |        |
| 207      | 2                   | 19.98       | 6.93        | 20.82       | 7.87        | Randler et al.         | 2019 | 6.0      | Germany     |        |
| 310      | 2                   | 21.90       | 7.72        | 22.42       | 8.93        | Clara, Gomes           | 2019 | 6.0      | Portugal    |        |
| 17       | 1                   | 22.20       | 8.50        | 22.70       | 8.01        | Thorleifsdottir et al  | 2002 | 6.5      | Iceland     | 5      |
| 18       | 1                   | 20.43       | 6.43        | 21.14       | 6.93        | Gruber et al           | 2018 | 6.5      | Canada      | 3      |
| 287      | 2                   | 21.00       | 6.70        | 21.60       | 7.40        | Park et al.            | 2002 | 6.5      | Japan       | 5      |
| 19       | 1                   | 20.28       | 7.12        | 20.78       | 7.85        | Werner et al           | 2009 | 6.7      | Switzerland |        |
| 20       | 1                   | 20.37       | 7.05        | 21.57       | 8.69        | Spruyt et al           | 2005 | 7.0      | Belgium     |        |
| 208      | 2                   | 20.23       | 6.82        | 21.20       | 8.08        | Randler et al.         | 2019 | 7.0      | Germany     |        |
| 285      | 2                   | 22.50       | 6.87        | 22.92       | 7.76        | Weaver et al.          | 2019 | 7.0      | USA         | 7      |
| 311      | 2                   | 21.95       | 7.72        | 22.63       | 9.05        | Clara, Gomes           | 2019 | 7.0      | Portugal    |        |
| 21       | 1                   | 21.83       | 7.25        | 22.87       | 10.27       | Russo et al            | 2007 | 8.0      | Italy       |        |
| 22       | 1                   | 20.47       | 7.02        | 21.64       | 8.67        | Spruyt et al           | 2005 | 8.0      | Belgium     |        |
| 23       | 1                   | 21.90       | 6.90        | 22.50       | 8.90        | Mishra et al           | 2017 | 8.0      | India       |        |
| 209      | 2                   | 20.43       | 6.73        | 21.57       | 8.13        | Randler et al.         | 2019 | 8.0      | Germany     |        |
| 312      | 2                   | 21.97       | 7.65        | 22.65       | 9.10        | Clara, Gomes           | 2019 | 8.0      | Portugal    |        |
| 24       | 1                   | 22.50       | 8.45        | 23.10       | 9.20        | Thorleifsdottir et al  | 2002 | 8.5      | Iceland     | 5      |
| 25       | 1                   | 20.83       | 6.43        | 21.69       | 7.25        | Gruber et al           | 2018 | 8.5      | Canada      | 3      |
| 288      | 2                   | 21.40       | 6.60        | 21.70       | 7.40        | Park et al.            | 2002 | 8.5      | Japan       | 5      |
| 26       | 1                   | 21.97       | 7.18        | 23.00       | 10.22       | Russo et al            | 2007 | 9.0      | Italy       |        |
| 27       | 1                   | 20.67       | 7.05        | 21.86       | 8.79        | Spruyt et al           | 2005 | 9.0      | Belgium     |        |
| 28       | 1                   | 20.95       | 5.88        | 22.18       | 7.97        | Arora et al            | 2018 | 9.0      | Qatar       |        |
| 29       | 1                   | 21.98       | 7.33        | 23.08       | 9.27        | Esposito et al         | 2014 | 9.0      | Italy       |        |

|    |     |   |       |      |       |       |                       |      |      |           |   |  |
|----|-----|---|-------|------|-------|-------|-----------------------|------|------|-----------|---|--|
| 1  |     |   |       |      |       |       |                       |      |      |           |   |  |
| 2  | 30  | 1 | 21.97 | 7.27 | 23.13 | 9.33  | Esposito et al        | 2014 | 9.0  | Italy     |   |  |
| 3  | 31  | 1 | 22.18 | 7.27 | 23.43 | 9.47  | Esposito et al        | 2014 | 9.0  | Italy     |   |  |
| 4  | 32  | 1 | 21.47 | 6.63 | 22.05 | 7.25  | Crowley et al         | 2014 | 9.0  | USA       |   |  |
| 5  | 210 | 2 | 20.47 | 6.73 | 21.92 | 8.47  | Randler et al.        | 2019 | 9.0  | Germany   |   |  |
| 6  | 313 | 2 | 22.07 | 7.67 | 22.75 | 9.15  | Clara, Gomes          | 2019 | 9.0  | Portugal  |   |  |
| 7  | 33  | 1 | 22.35 | 7.52 | 22.92 | 8.98  | Zhang et al           | 2010 | 9.2  | Hong Kong |   |  |
| 8  | 34  | 1 | 20.48 | 6.98 | 21.43 | 7.84  | Laberge et al         | 2001 | 10.0 | Canada    | 3 |  |
| 9  | 35  | 1 | 22.15 | 7.30 | 23.25 | 10.10 | Russo et al           | 2007 | 10.0 | Italy     |   |  |
| 10 | 36  | 1 | 20.79 | 7.07 | 22.04 | 8.89  | Spruyt et al          | 2005 | 10.0 | Belgium   |   |  |
| 11 | 37  | 1 | 21.73 | 6.77 | 22.43 | 7.37  | Crowley et al         | 2014 | 10.0 | USA       |   |  |
| 12 | 211 | 2 | 20.62 | 6.67 | 22.30 | 8.73  | Randler et al.        | 2019 | 10.0 | Germany   |   |  |
| 13 | 314 | 2 | 22.12 | 7.42 | 22.80 | 9.25  | Clara, Gomes          | 2019 | 10.0 | Portugal  |   |  |
| 14 | 38  | 1 | 22.60 | 7.75 | 23.45 | 9.40  | Thorleifsdottir et al | 2002 | 10.5 | Iceland   | 5 |  |
| 15 | 39  | 1 | 21.53 | 6.56 | 22.62 | 7.76  | Gruber et al          | 2018 | 10.5 | Canada    | 3 |  |
| 16 | 289 | 2 | 21.70 | 6.80 | 22.60 | 7.80  | Park et al.           | 2002 | 10.5 | Japan     | 5 |  |
| 17 | 40  | 1 | 21.50 | 7.08 | 22.37 | 8.42  | Carskadon             | 1990 | 11.0 | USA       |   |  |
| 18 | 41  | 1 | 21.40 | 6.70 | 22.52 | 8.88  | Carskadon             | 2011 | 11.0 | USA       | 1 |  |
| 19 | 42  | 1 | 20.78 | 6.98 | 21.76 | 8.13  | Laberge et al         | 2001 | 11.0 | Canada    | 3 |  |
| 20 | 43  | 1 | 22.37 | 7.08 | 23.48 | 9.98  | Russo et al           | 2007 | 11.0 | Italy     |   |  |
| 21 | 44  | 1 | 20.96 | 7.04 | 22.19 | 8.96  | Spruyt et al          | 2005 | 11.0 | Belgium   |   |  |
| 22 | 46  | 1 | 21.98 | 6.65 | 22.63 | 7.52  | Crowley et al         | 2014 | 11.0 | USA       |   |  |
| 23 | 47  | 1 | 21.28 | 6.77 | 22.78 | 9.82  | Kubiszewski et al     | 2014 | 11.0 | France    |   |  |
| 24 | 212 | 2 | 20.93 | 6.47 | 22.75 | 9.03  | Randler et al.        | 2019 | 11.0 | Germany   |   |  |
| 25 | 246 | 2 | 21.75 | 6.83 | 23.17 | 8.75  | Roth et al.           | 2019 | 11.0 | Israel    | 7 |  |
| 26 | 315 | 2 | 22.20 | 7.33 | 22.92 | 9.32  | Clara, Gomes          | 2019 | 11.0 | Portugal  |   |  |
| 27 | 48  | 1 | 22.70 | 7.30 | 23.00 | 8.10  | Yang et al            | 2005 | 11.2 | Korea     |   |  |
| 28 | 49  | 1 | 22.10 | 6.18 | 22.58 | 7.38  | Komada et al          | 2016 | 11.3 | Japan     |   |  |
| 29 | 268 | 2 | 21.26 | 6.53 | 22.83 | 8.73  | Foley et al.          | 2018 | 11.5 | USA       | 3 |  |
| 30 | 50  | 1 | 21.50 | 7.08 | 22.37 | 8.42  | Carskadon             | 1990 | 12.0 | USA       |   |  |
| 31 | 51  | 1 | 21.87 | 6.58 | 23.08 | 9.20  | Carskadon             | 2011 | 12.0 | USA       | 1 |  |
| 32 | 52  | 1 | 21.62 | 6.17 | 23.18 | 8.78  | Manber et al          | 1995 | 12.0 | USA       |   |  |
| 33 | 53  | 1 | 21.02 | 6.97 | 22.11 | 8.32  | Laberge et al         | 2001 | 12.0 | Canada    | 3 |  |
| 34 | 54  | 1 | 22.52 | 7.05 | 23.67 | 9.92  | Russo et al           | 2007 | 12.0 | Italy     |   |  |
| 35 | 55  | 1 | 21.12 | 6.97 | 22.34 | 9.08  | Spruyt et al          | 2005 | 12.0 | Belgium   |   |  |
| 36 | 56  | 1 | 22.53 | 6.57 | 23.73 | 9.17  | Gau & Merikangas      | 2004 | 12.0 | Taiwan    |   |  |
| 37 | 57  | 1 | 22.12 | 6.33 | 22.82 | 7.47  | Crowley et al         | 2014 | 12.0 | USA       |   |  |
| 38 | 58  | 1 | 21.36 | 6.81 | 22.89 | 9.10  | Arora & Taheri        | 2015 | 12.0 | UK        | 4 |  |
| 39 | 200 | 2 | 21.56 | 6.6  | 22.78 | 8.50  | Mireku et al.         | 2019 | 12.0 | UK        | 3 |  |
| 40 | 213 | 2 | 21.35 | 6.42 | 23.15 | 9.33  | Randler et al.        | 2019 | 12.0 | Germany   |   |  |
| 41 | 59  | 1 | 23.22 | 7.53 | 23.87 | 8.68  | Hasler et al          | 2012 | 12.3 | USA       |   |  |
| 42 | 60  | 1 | 23.15 | 7.95 | 24.50 | 10.30 | Thorleifsdottir et al | 2002 | 12.5 | Iceland   | 5 |  |
| 43 | 61  | 1 | 23.00 | 6.95 | 24.05 | 9.83  | Chung et al           | 2008 | 12.5 | Hong Kong |   |  |
| 44 | 290 | 2 | 22.40 | 6.90 | 23.50 | 8.20  | Park et al.           | 2002 | 12.5 | Japan     | 5 |  |
| 45 | 62  | 1 | 22.10 | 6.83 | 23.33 | 8.75  | Carskadon             | 1990 | 13.0 | USA       |   |  |
| 46 | 63  | 1 | 21.88 | 6.60 | 23.43 | 9.35  | Carskadon             | 2011 | 13.0 | USA       | 1 |  |
| 47 | 64  | 1 | 21.49 | 6.93 | 22.57 | 8.76  | Laberge et al         | 2001 | 13.0 | Canada    | 3 |  |
| 48 | 65  | 1 | 22.55 | 7.13 | 23.70 | 10.13 | Russo et al           | 2007 | 13.0 | Italy     |   |  |
| 49 | 66  | 1 | 21.12 | 7.09 | 22.31 | 8.98  | Spruyt et al          | 2005 | 13.0 | Belgium   |   |  |
| 50 | 67  | 1 | 21.56 | 6.92 | 22.96 | 9.65  | Van den Bulck         | 2004 | 13.0 | Belgium   | 3 |  |
| 51 | 68  | 1 | 22.10 | 6.80 | 21.90 | 8.70  | Mishra et al          | 2017 | 13.0 | India     |   |  |
| 52 | 69  | 1 | 22.50 | 6.33 | 23.33 | 7.92  | Crowley et al         | 2014 | 13.0 | USA       |   |  |
| 53 | 214 | 2 | 21.72 | 6.38 | 23.67 | 9.70  | Randler et al.        | 2019 | 13.0 | Germany   |   |  |

|    |     |   |       |      |       |       |                       |      |      |                 |       |  |
|----|-----|---|-------|------|-------|-------|-----------------------|------|------|-----------------|-------|--|
| 1  |     |   |       |      |       |       |                       |      |      |                 |       |  |
| 2  | 229 | 2 | 22.30 | 6.20 | 23.20 | 8.60  | Yeo et al.            | 2018 | 13.0 | Singapore       | 5     |  |
| 3  | 244 | 2 | 22.62 | 6.63 | 24.08 | 9.53  | Zerbini et al.        | 2017 | 13.0 | The Netherlands |       |  |
| 4  | 252 | 2 | 21.60 | 6.28 | 23.07 | 8.86  | Thoma et al.          | 2019 | 13.0 | Germany         | 7     |  |
| 5  | 70  | 1 | 21.85 | 6.60 | 22.07 | 6.88  | Peixoto et al         | 2009 | 13.1 | Brazil          | 10    |  |
| 6  | 71  | 1 | 23.20 | 7.00 | 23.50 | 8.90  | Yang et al            | 2005 | 13.3 | Korea           |       |  |
| 7  | 72  | 1 | 21.77 | 6.20 | 23.80 | 9.72  | Randler et al         | 2016 | 13.4 | Germany         |       |  |
| 8  | 73  | 1 | 22.43 | 6.50 | 23.58 | 10.00 | Brandalize et al      | 2011 | 13.4 | Brazil          | 11    |  |
| 9  | 74  | 1 | 22.08 | 5.98 | 23.90 | 9.37  | Wolfson & Carskado    | 1998 | 13.5 | USA             |       |  |
| 10 | 75  | 1 | 22.22 | 6.25 | 22.47 | 8.30  | Liu et al             | 2008 | 13.5 | China           |       |  |
| 11 | 240 | 2 | 21.90 | 6.20 | 23.10 | 9.20  | Temkin et al.         | 2018 | 13.5 | USA             |       |  |
| 12 | 253 | 2 | 22.30 | 7.08 | 23.43 | 8.27  | Hanish & Han          | 2018 | 13.5 | USA             | 7     |  |
| 13 | 317 | 2 | 21.65 | 6.37 | 23.32 | 9.52  | Weidenauer et al.     | 2019 | 13.5 | Germany         |       |  |
| 14 | 76  | 1 | 22.78 | 7.01 | 24.46 | 10.02 | Russo et al           | 2007 | 13.8 | Italy           | 4     |  |
| 15 | 77  | 1 | 22.68 | 6.22 | 23.08 | 7.57  | Komada et al          | 2016 | 13.9 | Japan           |       |  |
| 16 | 78  | 1 | 22.25 | 6.47 | 23.88 | 9.90  | Carskadon             | 2011 | 14.0 | USA             | 1     |  |
| 17 | 79  | 1 | 22.17 | 5.93 | 23.95 | 9.23  | Carskadon             | 1990 | 14.0 | USA             |       |  |
| 18 | 80  | 1 | 22.72 | 7.03 | 23.95 | 10.33 | Russo et al           | 2007 | 14.0 | Italy           |       |  |
| 19 | 81  | 1 | 23.38 | 6.98 | 24.48 | 10.25 | Chung et al           | 2008 | 14.0 | Hong Kong       |       |  |
| 20 | 82  | 1 | 22.17 | 7.07 | 23.45 | 8.35  | Short et al           | 2013 | 14.0 | Australia       |       |  |
| 21 | 83  | 1 | 22.00 | 6.75 | 23.77 | 10.32 | Kubiszewski et al     | 2014 | 14.0 | France          |       |  |
| 22 | 84  | 1 | 23.37 | 6.88 | 24.53 | 9.63  | Boergers et al        | 2014 | 14.0 | USA             | 11    |  |
| 23 | 215 | 2 | 22.17 | 6.40 | 24.15 | 10.07 | Randler et al.        | 2019 | 14.0 | Germany         |       |  |
| 24 | 230 | 2 | 22.40 | 6.40 | 23.40 | 8.90  | Yeo et al.            | 2018 | 14.0 | Singapore       | 5     |  |
| 25 | 255 | 2 | 23.10 | 6.19 | 24.61 | 10.52 | Arrona-Palacios       | 2017 | 14.0 | Mexico          | 9, 11 |  |
| 26 | 256 | 2 | 22.82 | 6.08 | 24.42 | 9.88  | Arrona-Palacios & D   | 2017 | 14.0 | Mexico          | 11    |  |
| 27 | 85  | 1 | 20.33 | 6.93 | 23.78 | 9.52  | Gariépy et al         | 2017 | 14.1 | Canada          |       |  |
| 28 | 86  | 1 | 23.13 | 7.34 | 24.66 | 10.63 | Collado et al         | 2012 | 14.1 | Spain           | 4     |  |
| 29 | 87  | 1 | 23.45 | 7.80 | 24.42 | 10.33 | Arrona-Palacios       | 2015 | 14.1 | Mexico          | 4     |  |
| 30 | 88  | 1 | 23.23 | 7.30 | 25.06 | 10.71 | Diaz-Morales et       | 2007 | 14.3 | Spain           | 4     |  |
| 31 | 89  | 1 | 23.80 | 7.95 | 25.55 | 10.50 | Thorleifsdottir et al | 2002 | 14.5 | Iceland         | 5     |  |
| 32 | 90  | 1 | 23.32 | 6.73 | 24.27 | 10.20 | Li et al.             | 2018 | 14.5 | Hong Kong       | 4     |  |
| 33 | 195 | 2 | 22.86 | 6.61 | 24.79 | 10.23 | Koscec et al.         | 2013 | 14.5 | Croatia         | 4, 11 |  |
| 34 | 227 | 2 | 22.87 | 6.52 | 23.66 | 8.42  | Harvey et al.         | 2018 | 14.5 | USA             | 7     |  |
| 35 | 248 | 2 | 23.33 | 7.70 | 24.57 | 8.78  | Martin et al.         | 2016 | 14.5 | Canada          | 4     |  |
| 36 | 291 | 2 | 23.70 | 7.00 | 24.60 | 8.80  | Park et al.           | 2002 | 14.5 | Japan           | 5     |  |
| 37 | 91  | 1 | 22.40 | 6.08 | 24.18 | 9.40  | Carskadon             | 2011 | 15.0 | USA             | 1     |  |
| 38 | 92  | 1 | 22.33 | 6.00 | 24.10 | 9.67  | Wolfson & Carskado    | 1998 | 15.0 | USA             |       |  |
| 39 | 93  | 1 | 22.53 | 6.38 | 24.05 | 9.85  | Carskadon             | 2011 | 15.0 | USA             | 1     |  |
| 40 | 94  | 1 | 22.79 | 6.92 | 24.46 | 9.92  | Giannotti et al.      | 2002 | 15.0 | Italy           | 4     |  |
| 41 | 95  | 1 | 23.43 | 7.02 | 24.52 | 10.38 | Chung et al           | 2008 | 15.0 | Hong Kong       |       |  |
| 42 | 96  | 1 | 24.00 | 6.80 | 23.60 | 9.50  | Yang et al            | 2005 | 15.0 | Korea           |       |  |
| 43 | 97  | 1 | 22.50 | 7.20 | 23.62 | 8.63  | Short et al           | 2013 | 15.0 | Australia       |       |  |
| 44 | 98  | 1 | 22.57 | 6.37 | 23.32 | 7.85  | Crowley et al         | 2014 | 15.0 | USA             |       |  |
| 45 | 99  | 1 | 23.50 | 6.97 | 24.90 | 9.90  | Boergers et al        | 2014 | 15.0 | USA             | 11    |  |
| 46 | 196 | 2 | 23.21 | 5.69 | 23.65 | 7.62  | Pande et al.          | 2018 | 15.0 | India           | 4     |  |
| 47 | 216 | 2 | 22.45 | 6.37 | 24.62 | 10.38 | Randler et al.        | 2019 | 15.0 | Germany         |       |  |
| 48 | 231 | 2 | 23.50 | 6.00 | 24.10 | 9.10  | Yeo et al.            | 2018 | 15.0 | Singapore       | 5     |  |
| 49 | 272 | 2 | 22.99 | 5.60 | 23.31 | 7.25  | Pande et al.          | 2018 | 15.0 | India           |       |  |
| 50 | 100 | 1 | 23.85 | 6.45 | 24.23 | 9.38  | Seo et al             | 2017 | 15.3 | Korea           |       |  |
| 51 | 101 | 1 | 23.73 | 7.13 | 24.94 | 10.24 | Borisenkov et al.     | 2016 | 15.4 | Russia          |       |  |
| 52 | 102 | 1 | 22.57 | 6.62 | 24.98 | 10.75 | Perkinson-Gloor et al | 2013 | 15.4 | Switzerland     | 11    |  |
| 53 | 242 | 2 | 23.37 | 6.33 | 24.51 | 9.73  | Mathew et al.         | 2019 | 15.5 | USA             | 3     |  |



|    |     |   |       |      |       |       |                       |      |      |             |    |
|----|-----|---|-------|------|-------|-------|-----------------------|------|------|-------------|----|
| 2  | 254 | 2 | 21.25 | 6.53 | 23.33 | 10.50 | Brand et al.          | 2009 | 15.5 | Switzerland | 7  |
| 3  | 275 | 2 | 23.76 | 6.31 | 25.10 | 8.39  | Quante et al.         | 2018 | 15.5 | USA         |    |
| 4  | 103 | 1 | 24.10 | 7.09 | 25.47 | 11.11 | Borisenkov et al.     | 2016 | 15.6 | Russia      |    |
| 5  | 104 | 1 | 22.52 | 6.63 | 25.10 | 10.32 | Preckel et al         | 2013 | 15.6 | Germany     |    |
| 6  | 45  | 1 | 22.35 | 6.53 | 22.37 | 8.42  | Warner et al          | 2008 | 16.0 | Australia   | 6  |
| 7  | 105 | 1 | 22.65 | 6.13 | 23.93 | 9.25  | Manber et al          | 1995 | 16.0 | USA         |    |
| 8  | 106 | 1 | 22.87 | 6.22 | 24.47 | 9.35  | Carskadon             | 1990 | 16.0 | USA         |    |
| 9  | 107 | 1 | 22.62 | 6.08 | 24.50 | 9.77  | Wolfson & Carskado    | 1998 | 16.0 | USA         |    |
| 10 | 108 | 1 | 22.85 | 6.38 | 24.42 | 10.10 | Carskadon             | 2011 | 16.0 | USA         | 1  |
| 11 | 109 | 1 | 22.36 | 6.46 | 22.80 | 9.44  | Knutson & Lauderda    | 2009 | 16.0 | USA         | 2  |
| 12 | 110 | 1 | 22.50 | 6.91 | 25.94 | 10.22 | Van den Bulck         | 2004 | 16.0 | Belgium     | 3  |
| 13 | 111 | 1 | 23.58 | 6.97 | 24.67 | 10.32 | Chung et al           | 2008 | 16.0 | Hong Kong   |    |
| 14 | 112 | 1 | 22.70 | 7.30 | 23.93 | 8.53  | Short et al           | 2013 | 16.0 | Australia   |    |
| 15 | 113 | 1 | 22.77 | 6.33 | 24.28 | 9.67  | Wolfson et al         | 2003 | 16.0 | USA         | 8  |
| 16 | 114 | 1 | 22.90 | 6.38 | 24.13 | 8.77  | Wolfson et al         | 2003 | 16.0 | USA         | 8  |
| 17 | 115 | 1 | 22.98 | 6.30 | 24.18 | 8.72  | Wolfson et al         | 2003 | 16.0 | USA         | 8  |
| 18 | 116 | 1 | 22.88 | 6.47 | 23.78 | 8.13  | Crowley et al         | 2014 | 16.0 | USA         |    |
| 19 | 117 | 1 | 24.60 | 6.65 | 25.25 | 9.73  | Kim et al             | 2011 | 16.0 | Korea       |    |
| 20 | 118 | 1 | 23.90 | 6.42 | 23.95 | 7.90  | Komada et al          | 2016 | 16.0 | Japan       |    |
| 21 | 119 | 1 | 24.02 | 7.08 | 24.58 | 9.95  | Boergers et al        | 2014 | 16.0 | USA         | 11 |
| 22 | 197 | 2 | 23.23 | 7.32 | 24.63 | 9.63  | Harbard et al.        | 2016 | 16.0 | Australia   | 6  |
| 23 | 217 | 2 | 22.63 | 6.37 | 24.92 | 10.42 | Randler et al.        | 2019 | 16.0 | Germany     |    |
| 24 | 232 | 2 | 23.70 | 6.10 | 24.30 | 9.30  | Yeo et al.            | 2018 | 16.0 | Singapore   | 5  |
| 25 | 249 | 2 | 22.50 | 6.50 | 24.50 | 10.00 | Garmy & Ward          | 2018 | 16.0 | Sweden      |    |
| 26 | 281 | 2 | 23.73 | 7.35 | 24.20 | 8.45  | Tashjian et al.       | 2019 | 16.0 | USA         |    |
| 27 | 120 | 1 | 23.28 | 7.33 | 24.63 | 9.62  | Bei et al             | 2014 | 16.2 | Australia   | 6  |
| 28 | 121 | 1 | 22.24 | 6.90 | 23.10 | 9.04  | Agostini et al        | 2017 | 16.2 | USA         | 9  |
| 29 | 122 | 1 | 22.63 | 6.00 | 22.80 | 8.77  | Liu et al             | 2008 | 16.4 | China       |    |
| 30 | 123 | 1 | 22.73 | 5.92 | 24.68 | 9.85  | Link & Ancoli-Israel  | 1995 | 16.5 | USA         |    |
| 31 | 124 | 1 | 24.01 | 8.08 | 26.20 | 10.80 | Thorleifsdottir et al | 2002 | 16.5 | Iceland     | 5  |
| 32 | 199 | 2 | 23.32 | 6.89 | 24.80 | 10.31 | Short et al.          | 2019 | 16.5 | Finland     | 9  |
| 33 | 292 | 2 | 23.90 | 6.90 | 25.00 | 9.00  | Park et al.           | 2002 | 16.5 | Japan       | 5  |
| 34 | 125 | 1 | 23.89 | 7.05 | 24.85 | 10.27 | Borisenkov et al.     | 2016 | 16.6 | Russia      |    |
| 35 | 126 | 1 | 23.08 | 6.20 | 24.35 | 9.33  | Sousa et al           | 2013 | 16.8 | Brazil      | 7  |
| 36 | 127 | 1 | 22.97 | 6.43 | 24.65 | 9.35  | Carskadon             | 1990 | 17.0 | USA         |    |
| 37 | 128 | 1 | 23.03 | 6.52 | 24.75 | 9.85  | Carskadon             | 2011 | 17.0 | USA         | 1  |
| 38 | 129 | 1 | 23.07 | 6.57 | 24.02 | 8.13  | Crowley et al         | 2014 | 17.0 | USA         |    |
| 39 | 130 | 1 | 24.58 | 6.63 | 25.23 | 9.63  | Kim et al             | 2011 | 17.0 | Korea       |    |
| 40 | 131 | 1 | 23.03 | 6.48 | 25.38 | 10.82 | Kubiszewski et al     | 2014 | 17.0 | France      |    |
| 41 | 132 | 1 | 24.58 | 7.22 | 25.13 | 9.92  | Boergers et al        | 2014 | 17.0 | USA         | 11 |
| 42 | 218 | 2 | 22.73 | 6.28 | 25.18 | 10.47 | Randler et al.        | 2019 | 17.0 | Germany     |    |
| 43 | 233 | 2 | 23.80 | 6.40 | 24.60 | 9.50  | Yeo et al.            | 2018 | 17.0 | Singapore   | 5  |
| 44 | 269 | 2 | 24.53 | 7.45 | 25.61 | 10.37 | Friborg et al.        | 2018 | 17.0 | Norway      | 12 |
| 45 | 133 | 1 | 24.90 | 6.30 | 23.90 | 9.30  | Yang et al            | 2005 | 17.1 | Korea       |    |
| 46 | 134 | 1 | 22.52 | 6.25 | 24.53 | 10.12 | Randler et al         | 2016 | 17.1 | Germany     |    |
| 47 | 135 | 1 | 22.77 | 6.33 | 24.28 | 9.67  | Wolfson & Carskado    | 1998 | 17.5 | USA         |    |
| 48 | 136 | 1 | 23.00 | 6.80 | 25.42 | 10.30 | Giannotti et al.      | 2002 | 17.5 | Italy       | 4  |
| 49 | 137 | 1 | 23.59 | 7.03 | 24.84 | 10.50 | Lehto et al           | 2016 | 17.5 | Finland     | 4  |
| 50 | 198 | 2 | 23.5  | 7.00 | 25.00 | 10.00 | Cabr -Riera et al.    | 2019 | 17.5 | Spain       |    |
| 51 | 138 | 1 | 23.28 | 6.78 | 25.52 | 11.22 | Sivertsen et al       | 2013 | 17.8 | Norway      | 7  |
| 52 | 139 | 1 | 21.85 | 6.17 | 24.82 | 9.53  | Wolfson & Carskado    | 1998 | 18.0 | USA         |    |
| 53 | 140 | 1 | 23.78 | 6.87 | 24.77 | 10.43 | Chung et al           | 2008 | 18.0 | Hong Kong   |    |

|    |     |   |       |      |       |       |                       |      |      |                 |    |  |
|----|-----|---|-------|------|-------|-------|-----------------------|------|------|-----------------|----|--|
| 1  |     |   |       |      |       |       |                       |      |      |                 |    |  |
| 2  | 141 | 1 | 24.23 | 8.07 | 24.75 | 8.60  | Crowley et al         | 2014 | 18.0 | USA             |    |  |
| 3  | 142 | 1 | 24.80 | 6.52 | 25.38 | 9.55  | Kim et al             | 2011 | 18.0 | Korea           |    |  |
| 4  | 219 | 2 | 23.10 | 6.53 | 25.40 | 10.45 | Randler et al.        | 2019 | 18.0 | Germany         |    |  |
| 5  | 234 | 2 | 24.20 | 6.60 | 24.70 | 9.40  | Yeo et al.            | 2018 | 18.0 | Singapore       | 5  |  |
| 6  | 143 | 1 | 24.30 | 8.08 | 26.20 | 10.60 | Thorleifsdottir et al | 2002 | 18.5 | Iceland         | 5  |  |
| 7  | 283 | 2 | 23.40 | 6.90 | 24.78 | 9.53  | Urner et al.          | 2009 | 18.5 | Switzerland     |    |  |
| 8  | 293 | 2 | 23.80 | 6.80 | 24.90 | 8.40  | Park et al.           | 2002 | 18.5 | Japan           | 5  |  |
| 9  | 144 | 1 | 24.42 | 6.30 | 25.18 | 8.58  | Miller et al          | 2010 | 18.8 | USA             |    |  |
| 10 | 220 | 2 | 23.25 | 7.02 | 25.22 | 10.30 | Randler et al.        | 2019 | 19.0 | Germany         |    |  |
| 11 | 262 | 2 | 23.03 | 7.47 | 24.77 | 9.38  | Porcheret et al.      | 2018 | 19.0 | Australia       |    |  |
| 12 | 235 | 2 | 24.64 | 6.63 | 24.73 | 8.73  | Kato et al.           | 2018 | 19.5 | Japan           |    |  |
| 13 | 145 | 1 | 23.73 | 7.11 | 25.30 | 9.59  | Korczak et al.        | 2008 | 19.6 | Brazil          | 4  |  |
| 14 | 146 | 1 | 23.99 | 7.81 | 25.50 | 9.95  | Kabrita et al         | 2014 | 19.6 | Lebanon         | 4  |  |
| 15 | 147 | 1 | 24.28 | 8.03 | 25.73 | 10.13 | Lund et al            | 2010 | 20.0 | USA             |    |  |
| 16 | 148 | 1 | 24.00 | 8.07 | 25.02 | 9.75  | Zavada et al          | 2005 | 20.0 | The Netherlands |    |  |
| 17 | 221 | 2 | 23.33 | 7.47 | 25.30 | 10.23 | Randler et al.        | 2019 | 20.0 | Germany         |    |  |
| 18 | 264 | 2 | 23.02 | 7.00 | 24.77 | 9.17  | Porcheret et al.      | 2018 | 20.0 | New Zealand     |    |  |
| 19 | 271 | 2 | 23.20 | 6.85 | 23.80 | 8.88  | Tomažič1 & Randler    | 2019 | 20.0 | Slovenija       |    |  |
| 20 | 277 | 2 | 23.78 | 6.52 | 24.30 | 8.20  | Lima et al.           | 2002 | 20.0 | Brazil          | 11 |  |
| 21 | 149 | 1 | 24.25 | 8.25 | 25.70 | 9.98  | Thorleifsdottir et al | 2002 | 20.5 | Iceland         | 5  |  |
| 22 | 243 | 2 | 22.92 | 6.50 | 23.95 | 7.90  | Sargent et al.        | 2014 | 20.5 | Australia       | 15 |  |
| 23 | 263 | 2 | 24.20 | 7.33 | 24.98 | 9.75  | Porcheret et al.      | 2018 | 20.5 | Australia       |    |  |
| 24 | 278 | 2 | 25.56 | 8.55 | 25.55 | 9.43  | Tsai & Li             | 2004 | 20.5 | Taiwan          | 3  |  |
| 25 | 294 | 2 | 23.90 | 6.70 | 24.90 | 8.20  | Park et al.           | 2002 | 20.5 | Japan           | 5  |  |
| 26 | 150 | 1 | 24.18 | 7.52 | 24.72 | 9.82  | Jankowski et al       | 2014 | 20.8 | Poland          |    |  |
| 27 | 151 | 1 | 25.56 | 8.55 | 25.55 | 9.43  | Tsai & Li             | 2004 | 21.0 | Taiwan          | 3  |  |
| 28 | 222 | 2 | 23.43 | 7.48 | 25.18 | 10.10 | Randler et al.        | 2019 | 21.0 | Germany         |    |  |
| 29 | 259 | 2 | 24.70 | 7.92 | 25.50 | 9.87  | Porcheret et al.      | 2018 | 21.0 | UK              |    |  |
| 30 | 282 | 2 | 23.77 | 7.63 | 24.83 | 9.30  | Umemura et al.        | 2018 | 21.0 | Brazil          |    |  |
| 31 | 152 | 1 | 23.84 | 7.58 | 25.74 | 9.63  | Vitale et al          | 2015 | 21.3 | Italy           | 4  |  |
| 32 | 260 | 2 | 24.32 | 8.03 | 25.23 | 9.88  | Porcheret et al.      | 2018 | 21.5 | The Netherlands |    |  |
| 33 | 153 | 1 | 23.90 | 7.87 | 24.90 | 9.88  | Jankowski et al       | 2014 | 21.7 | Germany         |    |  |
| 34 | 154 | 1 | 24.38 | 7.78 | 24.92 | 9.60  | Lo et al              | 2014 | 21.8 | Singapore       |    |  |
| 35 | 155 | 1 | 24.32 | 7.12 | 25.37 | 9.68  | Kim et al             | 2010 | 22.0 | Korea           |    |  |
| 36 | 156 | 1 | 24.62 | 6.90 | 25.87 | 10.20 | Teixeira et al        | 2012 | 22.0 | Brazil          |    |  |
| 37 | 223 | 2 | 23.50 | 7.52 | 25.28 | 10.02 | Randler et al.        | 2019 | 22.0 | Germany         |    |  |
| 38 | 157 | 1 | 24.20 | 8.02 | 25.80 | 9.98  | Thorleifsdottir et al | 2002 | 22.5 | Iceland         | 5  |  |
| 39 | 261 | 2 | 24.03 | 7.50 | 25.15 | 9.68  | Porcheret et al.      | 2018 | 22.5 | Germany         |    |  |
| 40 | 318 | 2 | 23.70 | 7.59 | 23.83 | 8.04  | Appleman et al.       | 2013 | 22.5 | USA             |    |  |
| 41 | 158 | 1 | 23.88 | 8.33 | 25.15 | 10.05 | Friborg et al         | 2012 | 22.7 | Norway          | 12 |  |
| 42 | 239 | 2 | 23.78 | 8.00 | 25.22 | 9.90  | Zerbini et al.        | 2019 | 22.7 | The Nethe       | 7  |  |
| 43 | 267 | 2 | 24.43 | 8.06 | 25.57 | 9.02  | Zerbini et al.        | 2019 | 22.7 | The Nethe       | 7  |  |
| 44 | 159 | 1 | 24.46 | 6.98 | 25.51 | 9.70  | Mirghani              | 2017 | 23.0 | Sudan           | 3  |  |
| 45 | 224 | 2 | 23.62 | 7.62 | 25.33 | 9.95  | Randler et al.        | 2019 | 23.0 | Germany         |    |  |
| 46 | 295 | 2 | 24.00 | 6.80 | 25.10 | 8.30  | Park et al.           | 2002 | 23.0 | Japan           | 5  |  |
| 47 | 160 | 1 | 23.75 | 7.75 | 24.13 | 8.51  | Friborg et al         | 2014 | 23.4 | Norway          | 12 |  |
| 48 | 238 | 2 | 23.70 | 7.18 | 25.05 | 9.97  | Zerbini et al.        | 2019 | 23.5 | The Nethe       | 7  |  |
| 49 | 266 | 2 | 24.34 | 7.65 | 25.52 | 9.58  | Zerbini et al.        | 2019 | 23.5 | The Nethe       | 7  |  |
| 50 | 284 | 2 | 24.03 | 7.77 | 25.27 | 9.80  | Urner et al.          | 2009 | 23.5 | Switzerland     |    |  |
| 51 | 225 | 2 | 23.67 | 7.83 | 25.33 | 9.90  | Randler et al.        | 2019 | 24.0 | Germany         |    |  |
| 52 | 257 | 2 | 23.70 | 7.77 | 24.65 | 9.37  | Santisteban et al.    | 2018 | 24.0 | Canada          | 14 |  |
| 53 | 258 | 2 | 24.95 | 8.40 | 25.08 | 8.75  | Santisteban et al.    | 2018 | 24.0 | Canada          | 14 |  |

|    |     |   |       |      |       |       |                       |      |      |                 |    |  |
|----|-----|---|-------|------|-------|-------|-----------------------|------|------|-----------------|----|--|
| 1  |     |   |       |      |       |       |                       |      |      |                 |    |  |
| 2  | 161 | 1 | 24.27 | 7.95 | 25.75 | 9.80  | Thorleifsdottir et al | 2002 | 24.5 | Iceland         | 5  |  |
| 3  | 270 | 2 | 23.47 | 6.98 | 24.22 | 8.10  | Kayaba et al.         | 2018 | 24.5 | Japan           | 16 |  |
| 4  | 162 | 1 | 23.85 | 7.83 | 24.93 | 9.95  | Björkqvist et al      | 2014 | 24.9 | Finland         | 7  |  |
| 5  | 163 | 1 | 23.30 | 7.34 | 24.87 | 9.52  | Randler et al         | 2014 | 25.0 | Germany         | 3  |  |
| 6  | 164 | 1 | 23.52 | 7.93 | 24.47 | 9.18  | Lo et al              | 2014 | 25.0 | UK              |    |  |
| 7  | 226 | 2 | 23.62 | 7.65 | 25.18 | 9.67  | Randler et al.        | 2019 | 25.0 | Germany         |    |  |
| 8  | 250 | 2 | 23.17 | 7.08 | 24.22 | 9.02  | Bijlenga et al.       | 2011 | 25.0 | The Nethe       | 7  |  |
| 9  | 276 | 2 | 24.45 | 7.48 | 25.15 | 9.03  | Rahafar et al.        | 2018 | 25.0 | Germany         |    |  |
| 10 | 165 | 1 | 22.58 | 6.47 | 22.53 | 6.64  | Friborg et al         | 2012 | 25.4 | Gana            | 12 |  |
| 11 | 320 | 2 | 23.38 | 7.42 | 24.66 | 9.38  | Kasaeian et al.       | 2019 | 25.5 | Germany         |    |  |
| 12 | 166 | 1 | 23.53 | 7.74 | 24.44 | 9.26  | Santhi et al          | 2016 | 25.6 | UK              | 3  |  |
| 13 | 167 | 1 | 23.60 | 7.93 | 24.21 | 8.68  | Rosenthal et al       | 2001 | 26.0 | USA             | 4  |  |
| 14 | 193 | 2 | 23.75 | 6.79 | 25.25 | 9.36  | Sexton-Radex & Har    | 1992 | 26.0 | USA             | 4  |  |
| 15 | 168 | 1 | 24.35 | 8.00 | 25.45 | 9.95  | Thorleifsdottir et al | 2002 | 26.5 | Iceland         | 5  |  |
| 16 | 192 | 2 | 23.50 | 6.70 | 25.45 | 8.75  | Takahashi et al.      | 2018 | 26.5 | Singapore       | 4  |  |
| 17 | 280 | 2 | 23.88 | 7.50 | 24.63 | 9.80  | Suh et al.            | 2018 | 27.0 | Korea           |    |  |
| 18 | 296 | 2 | 23.70 | 6.70 | 24.60 | 8.10  | Park et al.           | 2002 | 27.0 | Japan           | 5  |  |
| 19 | 169 | 1 | 23.80 | 7.63 | 24.80 | 9.22  | Zavada et al          | 2005 | 27.5 | The Netherlands |    |  |
| 20 | 170 | 1 | 24.20 | 7.80 | 25.10 | 9.20  | Thorleifsdottir et al | 2002 | 28.5 | Iceland         | 5  |  |
| 21 | 171 | 1 | 23.07 | 6.38 | 24.23 | 8.63  | Soehner et al         | 2011 | 31.5 | USA             |    |  |
| 22 | 245 | 2 | 23.70 | 7.50 | 23.90 | 8.10  | Chang et al.          | 2009 | 32.0 | USA             | 7  |  |
| 23 | 297 | 2 | 23.70 | 6.60 | 24.10 | 7.80  | Park et al.           | 2002 | 32.0 | Japan           | 5  |  |
| 24 | 172 | 1 | 23.05 | 6.93 | 24.02 | 8.82  | Randler et al         | 2015 | 32.8 | Poland          |    |  |
| 25 | 237 | 2 | 23.82 | 9.07 | 25.60 | 11.38 | Waleriańczyk et al.   | 2019 | 33.5 | Poland          |    |  |
| 26 | 173 | 1 | 23.72 | 7.57 | 24.48 | 9.17  | Randler et al         | 2015 | 34.0 | Spain           |    |  |
| 27 | 174 | 1 | 23.57 | 7.10 | 24.33 | 8.48  | Zavada et al          | 2005 | 35.0 | The Netherlands |    |  |
| 28 | 194 | 2 | 23.88 | 7.93 | 25.31 | 9.70  | Miller-Mendes et al.  | 2019 | 35.0 | Portugal        | 4  |  |
| 29 | 273 | 2 | 23.60 | 7.28 | 24.47 | 9.28  | Pilz et al.           | 2018 | 35.0 | Brazil          | 17 |  |
| 30 | 274 | 2 | 23.48 | 7.23 | 24.42 | 9.03  | Pilz et al.           | 2018 | 35.0 | Brazil          | 17 |  |
| 31 | 286 | 2 | 24.25 | 7.00 | 24.47 | 7.37  | Zhang et al.          | 2019 | 35.0 | China           | 9  |  |
| 32 | 175 | 1 | 23.82 | 7.48 | 24.34 | 8.91  | Roepke&Duffy          | 2010 | 36.0 | USA             | 4  |  |
| 33 | 176 | 1 | 23.20 | 7.03 | 24.03 | 8.99  | Taillard et al        | 1999 | 36.1 | France          | 4  |  |
| 34 | 298 | 2 | 23.70 | 6.40 | 24.00 | 7.60  | Park et al.           | 2002 | 37.0 | Japan           | 5  |  |
| 35 | 177 | 1 | 23.07 | 6.38 | 24.23 | 8.63  | Borchers et al        | 2015 | 38.6 | Côte d'Ivoire   |    |  |
| 36 | 251 | 2 | 23.00 | 6.70 | 23.68 | 7.60  | Bijlenga et al.       | 2011 | 40.0 | The Nethe       | 7  |  |
| 37 | 178 | 1 | 23.35 | 6.82 | 23.85 | 8.45  | Gau & Merikangas      | 2004 | 41.0 | Taiwan          |    |  |
| 38 | 179 | 1 | 23.20 | 6.58 | 23.68 | 8.00  | Paine & Gander        | 2016 | 41.1 | New Zeala       | 4  |  |
| 39 | 180 | 1 | 23.40 | 7.19 | 23.73 | 8.69  | Zhang et al           | 2010 | 41.2 | Hong Kong       | 3  |  |
| 40 | 299 | 2 | 23.50 | 6.30 | 24.00 | 7.50  | Park et al.           | 2002 | 42.0 | Japan           | 5  |  |
| 41 | 181 | 1 | 22.60 | 6.68 | 23.32 | 8.33  | Randler et al         | 2015 | 42.6 | Germany         |    |  |
| 42 | 182 | 1 | 23.15 | 6.50 | 24.03 | 8.51  | Ursin et al           | 2005 | 43.0 | Norway          | 3  |  |
| 43 | 183 | 1 | 24.02 | 7.13 | 24.18 | 7.83  | Campanini et al       | 2017 | 45.0 | Brazil          | 13 |  |
| 44 | 184 | 1 | 23.97 | 6.60 | 24.35 | 7.97  | Campanini et al       | 2017 | 45.0 | Brazil          | 13 |  |
| 45 | 265 | 2 | 23.33 | 5.71 | 23.58 | 7.33  | Lowden et al.         | 2018 | 45.5 | Sweden          | 12 |  |
| 46 | 228 | 2 | 23.47 | 6.00 | 23.67 | 7.15  | Islam et al.          | 2018 | 46.0 | Japan           | 9  |  |
| 47 | 241 | 2 | 22.78 | 6.40 | 23.15 | 7.80  | Hulsegge et al.       | 2019 | 46.0 | The Nethe       | 7  |  |
| 48 | 300 | 2 | 23.60 | 6.30 | 23.90 | 7.40  | Park et al.           | 2002 | 47.0 | Japan           | 5  |  |
| 49 | 185 | 1 | 23.77 | 6.53 | 24.20 | 7.43  | Hashizaki et al       | 2015 | 47.9 | Japan           |    |  |
| 50 | 186 | 1 | 23.70 | 7.07 | 24.32 | 7.80  | Zavada et al          | 2005 | 50.0 | The Netherlands |    |  |
| 51 | 187 | 1 | 24.43 | 6.87 | 24.53 | 8.59  | Chan et al            | 2014 | 50.8 | Hong Kong       | 4  |  |
| 52 | 188 | 1 | 23.14 | 6.49 | 23.55 | 7.95  | Taillard et al        | 2004 | 51.3 | France          | 4  |  |
| 53 | 236 | 2 | 23.49 | 6.08 | 23.65 | 7.08  | Kato et al.           | 2018 | 52.0 | Japan           |    |  |

|    |     |   |       |      |       |      |                 |      |      |         |   |
|----|-----|---|-------|------|-------|------|-----------------|------|------|---------|---|
| 1  |     |   |       |      |       |      |                 |      |      |         |   |
| 2  | 247 | 2 | 22.50 | 6.5  | 23.25 | 7.72 | Mokhlesi et al. | 2019 | 52.0 | USA     |   |
| 3  | 301 | 2 | 23.20 | 6.20 | 23.70 | 7.30 | Park et al.     | 2002 | 52.0 | Japan   | 5 |
| 4  | 189 | 1 | 23.73 | 6.61 | 24.50 | 8.20 | Johnsen et al   | 2013 | 54.3 | Norway  | 3 |
| 5  | 319 | 2 | 22.20 | 6.00 | 22.50 | 7.00 | Mota et al.     | 2019 | 56.0 | Brazil  |   |
| 6  | 302 | 2 | 22.70 | 6.00 | 23.60 | 7.10 | Park et al.     | 2002 | 57.0 | Japan   | 5 |
| 7  | 190 | 1 | 22.70 | 7.00 | 23.26 | 7.73 | Reutrakul et al | 2013 | 58.4 | Mexico  | 4 |
| 8  | 316 | 2 | 23.70 | 7.33 | 24.09 | 8.02 | Kelly et al.    | 2019 | 61.5 | Ireland |   |
| 9  | 303 | 2 | 22.50 | 6.10 | 23.20 | 6.90 | Park et al.     | 2002 | 62.0 | Japan   | 5 |
| 10 | 304 | 2 | 22.20 | 6.10 | 22.30 | 6.60 | Park et al.     | 2002 | 67.0 | Japan   | 5 |
| 11 | 305 | 2 | 21.90 | 6.20 | 22.20 | 6.70 | Park et al.     | 2002 | 72.0 | Japan   | 5 |
| 12 | 306 | 2 | 21.80 | 6.20 | 22.10 | 6.40 | Park et al.     | 2002 | 77.0 | Japan   | 5 |
| 13 | 307 | 2 | 21.50 | 6.20 | 21.60 | 6.60 | Park et al.     | 2002 | 85.0 | Japan   | 5 |

1 - averaged and simulated in the previous reports  
2 - more recently added

**rtailment after maintaini**

Explanation      Three  
methods

0

0

0

0

0

Taken from a g

0

0

0

Taken from a g

0

0

0

0

Averaged over

0

Averaged over

0

0

0

Taken from a g

0

0

0

0

0

0

0

0

0

0

0

Taken from a g

0

Averaged over

2

Taken from a g

0

0

0

Data of control

2

0

0

0

0

0

0

Taken from a g

0

Averaged over

2

Taken from a g

0

0

0

2

0

|    |                 |   |
|----|-----------------|---|
| 1  |                 |   |
| 2  |                 | 0 |
| 3  |                 | 0 |
| 4  |                 | 2 |
| 5  |                 | 0 |
| 6  |                 | 0 |
| 7  |                 | 0 |
| 8  |                 | 0 |
| 9  | Averaged over   | 0 |
| 10 |                 | 0 |
| 11 |                 | 0 |
| 12 |                 | 2 |
| 13 |                 | 0 |
| 14 |                 | 0 |
| 15 |                 | 0 |
| 16 | Taken from a g  | 0 |
| 17 | Averaged over   | 2 |
| 18 | Taken from a g  | 0 |
| 19 |                 | 0 |
| 20 | Sleep in Americ | 0 |
| 21 | Averaged over   | 0 |
| 22 |                 | 0 |
| 23 |                 | 0 |
| 24 |                 | 0 |
| 25 |                 | 2 |
| 26 |                 | 0 |
| 27 |                 | 0 |
| 28 |                 | 0 |
| 29 | Data of control | 2 |
| 30 |                 | 0 |
| 31 |                 | 0 |
| 32 |                 | 0 |
| 33 | Averaged over   | 0 |
| 34 |                 | 0 |
| 35 | Sleep in Americ | 0 |
| 36 |                 | 0 |
| 37 |                 | 0 |
| 38 | Averaged over   | 0 |
| 39 |                 | 0 |
| 40 |                 | 0 |
| 41 |                 | 0 |
| 42 |                 | 2 |
| 43 | Averaged over   | 0 |
| 44 | Averaged over   | 0 |
| 45 |                 | 0 |
| 46 |                 | 0 |
| 47 |                 | 2 |
| 48 | Taken from a g  | 0 |
| 49 |                 | 0 |
| 50 |                 | 0 |
| 51 | Taken from a g  | 0 |
| 52 |                 | 0 |
| 53 | Sleep in Americ | 0 |
| 54 | Averaged over   | 0 |
| 55 |                 | 0 |
| 56 |                 | 0 |
| 57 |                 | 0 |
| 58 | Averaged over   | 0 |
| 59 |                 | 0 |
| 60 |                 | 2 |
|    |                 | 0 |

|    |                  |   |
|----|------------------|---|
| 1  |                  |   |
| 2  | Taken from a g   | 0 |
| 3  | ;                | 0 |
| 4  | Data of control  | 1 |
| 5  | Living with elec | 2 |
| 6  |                  | 0 |
| 7  |                  | 0 |
| 8  |                  | 0 |
| 9  | Early school sta | 0 |
| 10 |                  | 0 |
| 11 |                  | 0 |
| 12 |                  | 0 |
| 13 | Data of control  | 2 |
| 14 |                  | 0 |
| 15 | Averaged over    | 0 |
| 16 |                  | 0 |
| 17 |                  | 0 |
| 18 | Sleep in Americ  | 0 |
| 19 |                  | 0 |
| 20 |                  | 0 |
| 21 |                  | 0 |
| 22 |                  | 1 |
| 23 |                  | 0 |
| 24 |                  | 0 |
| 25 | Early school sta | 0 |
| 26 |                  | 0 |
| 27 | Taken from a g   | 0 |
| 28 | Averaged over    | 0 |
| 29 | Early school sta | 0 |
| 30 |                  | 0 |
| 31 |                  | 0 |
| 32 | Averaged over    | 0 |
| 33 | Averaged over    | 2 |
| 34 | Averaged over    | 0 |
| 35 | Taken from a g   | 0 |
| 36 | Averaged over    | 0 |
| 37 | Averaged over    | 0 |
| 38 | Data of control  | 1 |
| 39 | Averaged over    | 2 |
| 40 | Taken from a g   | 0 |
| 41 | Sleep in Americ  | 0 |
| 42 |                  | 0 |
| 43 |                  | 0 |
| 44 | Sleep in Americ  | 0 |
| 45 | Averaged over    | 0 |
| 46 |                  | 0 |
| 47 |                  | 0 |
| 48 |                  | 0 |
| 49 |                  | 1 |
| 50 |                  | 2 |
| 51 | Early school sta | 0 |
| 52 | Averaged over    | 0 |
| 53 |                  | 0 |
| 54 |                  | 0 |
| 55 | Taken from a g   | 0 |
| 56 |                  | 0 |
| 57 |                  | 0 |
| 58 |                  | 0 |
| 59 |                  | 0 |
| 60 | Early school sta | 0 |
|    | Averaged over    | 0 |

|    |                  |   |
|----|------------------|---|
| 1  |                  |   |
| 2  | Data of control  | 1 |
| 3  |                  | 0 |
| 4  |                  | 0 |
| 5  |                  | 0 |
| 6  | Free days are h  | 0 |
| 7  |                  | 0 |
| 8  |                  | 0 |
| 9  |                  | 0 |
| 10 |                  | 0 |
| 11 | Sleep in Americ  | 0 |
| 12 | Averaged over    | 0 |
| 13 | Averaged over    | 0 |
| 14 |                  | 0 |
| 15 |                  | 1 |
| 16 | Data of Survey,  | 0 |
| 17 | Data of Survey,  | 1 |
| 18 | Data of Survey,  | 2 |
| 19 |                  | 2 |
| 20 |                  | 0 |
| 21 |                  | 0 |
| 22 | Early school sta | 0 |
| 23 | Free days are h  | 0 |
| 24 |                  | 0 |
| 25 | Taken from a g   | 0 |
| 26 |                  | 0 |
| 27 |                  | 2 |
| 28 | Free days are h  | 2 |
| 29 | Averaged over    | 2 |
| 30 |                  | 0 |
| 31 |                  | 0 |
| 32 | Taken from a g   | 0 |
| 33 | Averaged over    | 0 |
| 34 | Taken from a g   | 0 |
| 35 |                  | 0 |
| 36 | Data of control  | 1 |
| 37 |                  | 0 |
| 38 | Sleep in Americ  | 0 |
| 39 |                  | 2 |
| 40 |                  | 0 |
| 41 |                  | 0 |
| 42 | Early school sta | 0 |
| 43 |                  | 0 |
| 44 | Taken from a g   | 0 |
| 45 | Averaged over    | 1 |
| 46 |                  | 0 |
| 47 |                  | 0 |
| 48 |                  | 0 |
| 49 | Averaged over    | 0 |
| 50 | Averaged over    | 0 |
| 51 |                  | 2 |
| 52 | Data of control  | 0 |
| 53 |                  | 0 |
| 54 |                  | 0 |



|    |                      |   |
|----|----------------------|---|
| 1  |                      |   |
| 2  |                      | 2 |
| 3  |                      | 0 |
| 4  |                      | 0 |
| 5  | Taken from a g       | 0 |
| 6  | Taken from a g       | 0 |
| 7  |                      | 2 |
| 8  | Taken from a g       | 0 |
| 9  |                      | 2 |
| 10 |                      | 0 |
| 11 |                      | 0 |
| 12 |                      | 0 |
| 13 |                      | 0 |
| 14 | Averaged over        | 2 |
| 15 | Averaged over        | 0 |
| 16 |                      | 0 |
| 17 |                      | 0 |
| 18 | ;                    | 0 |
| 19 |                      | 0 |
| 20 |                      | 0 |
| 21 |                      | 0 |
| 22 |                      | 0 |
| 23 | Early school sta     | 0 |
| 24 | Taken from a g       | 0 |
| 25 | Training and re 1, 2 |   |
| 26 |                      | 0 |
| 27 | Averaged over        | 1 |
| 28 | Taken from a g       | 0 |
| 29 |                      | 0 |
| 30 |                      | 0 |
| 31 | Averaged over        | 1 |
| 32 |                      | 0 |
| 33 |                      | 0 |
| 34 |                      | 2 |
| 35 | Averaged over        | 2 |
| 36 |                      | 0 |
| 37 | ;                    | 0 |
| 38 |                      | 0 |
| 39 |                      | 0 |
| 40 |                      | 0 |
| 41 |                      | 0 |
| 42 |                      | 0 |
| 43 |                      | 0 |
| 44 | Taken from a g       | 0 |
| 45 |                      | 0 |
| 46 |                      | 0 |
| 47 | Averaged over        | 1 |
| 48 | Data of control      | 0 |
| 49 | Data of control      | 0 |
| 50 | Averaged over        | 0 |
| 51 |                      | 0 |
| 52 |                      | 0 |
| 53 | Taken from a g       | 0 |
| 54 | Averaged over        | 1 |
| 55 | Data of control      | 0 |
| 56 | Data of control      | 0 |
| 57 |                      | 2 |
| 58 |                      | 0 |
| 59 |                      | 0 |
| 60 | Data of Survey,      | 0 |
|    | Data of Survey,      | 2 |

|    |                  |   |
|----|------------------|---|
| 1  |                  |   |
| 2  | Taken from a g   | 0 |
| 3  | Narcolepsy dia   | 0 |
| 4  | Data of control  | 2 |
| 5  | Averaged over    | 0 |
| 6  |                  | 0 |
| 7  |                  | 0 |
| 8  |                  | 0 |
| 9  | Data of control  | 0 |
| 10 |                  | 0 |
| 11 | Averaged over    | 1 |
| 12 |                  | 0 |
| 13 | Averaged over    | 2 |
| 14 | Averaged over    | 0 |
| 15 | Averaged over    | 0 |
| 16 | Averaged over    | 0 |
| 17 | Taken from a g   | 0 |
| 18 | Averaged over    | 0 |
| 19 |                  | 0 |
| 20 | Taken from a g   | 0 |
| 21 |                  | 0 |
| 22 | ;                | 0 |
| 23 | Taken from a g   | 0 |
| 24 |                  | 0 |
| 25 | Data of control  | 2 |
| 26 | Taken from a g   | 0 |
| 27 |                  | 0 |
| 28 |                  | 0 |
| 29 |                  | 0 |
| 30 |                  | 0 |
| 31 | ;                | 0 |
| 32 | Averaged over    | 0 |
| 33 | Data of Survey,  | 1 |
| 34 | Data of Survey,  | 0 |
| 35 | Averaged over    | 2 |
| 36 | Averaged over    | 0 |
| 37 | Averaged over    | 0 |
| 38 | Averaged over    | 0 |
| 39 | Taken from a g   | 0 |
| 40 |                  | 0 |
| 41 | Data of control  | 0 |
| 42 |                  | 0 |
| 43 |                  | 0 |
| 44 | Averaged over    | 2 |
| 45 | Averaged over    | 0 |
| 46 | Taken from a g   | 0 |
| 47 |                  | 0 |
| 48 | Averaged over    | 0 |
| 49 | Data of Diary, / | 2 |
| 50 | Data of Diary, / | 1 |
| 51 | Averaged over    | 2 |
| 52 | Averaged over    | 0 |
| 53 | Data of control  | 2 |
| 54 | Taken from a g   | 0 |
| 55 |                  | 2 |
| 56 |                  | 0 |
| 57 | ;                | 0 |
| 58 |                  | 0 |
| 59 | Averaged over    | 0 |
| 60 | Averaged over    | 0 |

|    |                |   |
|----|----------------|---|
| 1  |                |   |
| 2  |                | 0 |
| 3  | Taken from a g | 0 |
| 4  | Averaged over  | 0 |
| 5  |                | 0 |
| 6  | Taken from a g | 0 |
| 7  | Averaged over  | 0 |
| 8  |                | 0 |
| 9  |                | 0 |
| 10 | Taken from a g | 0 |
| 11 | Taken from a g | 0 |
| 12 | Taken from a g | 0 |
| 13 | Taken from a g | 0 |
| 14 | Taken from a g | 0 |
| 15 | Taken from a g | 0 |
| 16 | 2 - Actigra    |   |
| 17 | 1 - Dairy      |   |
| 18 | 0 - Survey     |   |
| 19 |                |   |
| 20 |                |   |
| 21 |                |   |
| 22 |                |   |
| 23 |                |   |
| 24 |                |   |
| 25 |                |   |
| 26 |                |   |
| 27 |                |   |
| 28 |                |   |
| 29 |                |   |
| 30 |                |   |
| 31 |                |   |
| 32 |                |   |
| 33 |                |   |
| 34 |                |   |
| 35 |                |   |
| 36 |                |   |
| 37 |                |   |
| 38 |                |   |
| 39 |                |   |
| 40 |                |   |
| 41 |                |   |
| 42 |                |   |
| 43 |                |   |
| 44 |                |   |
| 45 |                |   |
| 46 |                |   |
| 47 |                |   |
| 48 |                |   |
| 49 |                |   |
| 50 |                |   |
| 51 |                |   |
| 52 |                |   |
| 53 |                |   |
| 54 |                |   |
| 55 |                |   |
| 56 |                |   |
| 57 |                |   |
| 58 |                |   |
| 59 |                |   |
| 60 |                |   |

1  
2  
3  
4  
5  
6  
7  
8  
9  
10  
11  
12  
13  
14  
15  
16  
17  
18  
19  
20  
21  
22  
23  
24  
25  
26  
27  
28  
29  
30  
31  
32  
33  
34  
35  
36  
37  
38  
39  
40  
41  
42  
43  
44  
45  
46  
47  
48  
49  
50  
51  
52  
53  
54  
55  
56  
57  
58  
59  
60

**ng perennial DST: ain't they as black as they are painted?**

Reference in more details

Author(s). Title. Journal. Year;Volume(Issue):Pages

Randler C, Vollmer C, Kalb N, Itzek-Greulich H. Breakpoints of time in bed, midpoint of sleep, and social jetlag f  
Randler C, Fontius I, Vollmer C. Delayed weekend sleep pattern in German infants and children aged 0–6 years  
Randler C, Fontius I, Vollmer C. Delayed weekend sleep pattern in German infants and children aged 0–6 years  
Randler C, Vollmer C, Kalb N, Itzek-Greulich H. Breakpoints of time in bed, midpoint of sleep, and social jetlag f  
Thorleifsdottir B, Bjornsson JK, Benediktsdottir B, Gislason T, Kristbjarnarson H. Sleep and sleep habits from ch  
Randler C, Fontius I, Vollmer C. Delayed weekend sleep pattern in German infants and children aged 0–6 years  
Randler C, Vollmer C, Kalb N, Itzek-Greulich H. Breakpoints of time in bed, midpoint of sleep, and social jetlag f  
Thorleifsdottir B, Bjornsson JK, Benediktsdottir B, Gislason T, Kristbjarnarson H. Sleep and sleep habits from ch  
Randler C, Fontius I, Vollmer C. Delayed weekend sleep pattern in German infants and children aged 0–6 years  
Randler C, Vollmer C, Kalb N, Itzek-Greulich H. Breakpoints of time in bed, midpoint of sleep, and social jetlag f  
Randler C, Fontius I, Vollmer C. Delayed weekend sleep pattern in German infants and children aged 0–6 years  
Touchette E, Mongrain V, Petit D, Tremblay RE, Montplaisir JY. Development of sleep-wake schedules during c  
Doi Y, Ishihara K, Uchiyama M. Epidemiological study on chronotype among preschool children in Japan: Preva  
Fukuda K, Hasegawa T, Kawahashi I, Imada S, Preschool children’s eating and sleeping habits: Late rising and b  
Randler C, Vollmer C, Kalb N, Itzek-Greulich H. Breakpoints of time in bed, midpoint of sleep, and social jetlag f  
Clara MI, Gomes AA, An epidemiological study of sleep–wake timings in school children from 4 to 11 years old.  
Thorleifsdottir B, Bjornsson JK, Benediktsdottir B, Gislason T, Kristbjarnarson H. Sleep and sleep habits from ch  
Mishra A, Pandey RK, Minz A, Arora V. Sleeping habits among school children and their effects on sleep patter  
Randler C, Fontius I, Vollmer C. Delayed weekend sleep pattern in German infants and children aged 0–6 years  
Touchette E, Mongrain V, Petit D, Tremblay RE, Montplaisir JY. Development of sleep-wake schedules during c  
Randler C, Vollmer C, Kalb N, Itzek-Greulich H. Breakpoints of time in bed, midpoint of sleep, and social jetlag f  
Clara MI, Gomes AA, An epidemiological study of sleep–wake timings in school children from 4 to 11 years old.  
Stoner L, Castro N, Signal L, Skidmore P, Faulkner J, Lark S, Williams MA, Muller D, Harrex H. Sleep and Adiposi  
Spruyt K, O’Brien LM, Cluydts R, Verleye GB, Ferri R. Odds, prevalence and predictors of sleep problems in sch  
Randler C, Fontius I, Vollmer C. Delayed weekend sleep pattern in German infants and children aged 0–6 years  
Touchette E, Mongrain V, Petit D, Tremblay RE, Montplaisir JY. Development of sleep-wake schedules during c  
Randler C, Vollmer C, Kalb N, Itzek-Greulich H. Breakpoints of time in bed, midpoint of sleep, and social jetlag f  
Clara MI, Gomes AA, An epidemiological study of sleep–wake timings in school children from 4 to 11 years old.  
Thorleifsdottir B, Bjornsson JK, Benediktsdottir B, Gislason T, Kristbjarnarson H. Sleep and sleep habits from ch  
Gruber R, Somerville G, Wells S, Keskinel D, Santisteban JA. An actigraphic study of the sleep patterns of young  
Park YM, Matsumoto K, Seo YJ, Kang MJ, Nagashima H. Changes of sleep or waking habits by age and sex in Ja  
Werner H, Lebourgeois MK, Geiger A, Jenni OG. Assessment of chronotype in four- to eleven-year-old children  
Spruyt K, O’Brien LM, Cluydts R, Verleye GB, Ferri R. Odds, prevalence and predictors of sleep problems in sch  
Randler C, Vollmer C, Kalb N, Itzek-Greulich H. Breakpoints of time in bed, midpoint of sleep, and social jetlag f  
Weaver RG, Beets MW, Perry M, Hunt E, Brazendale K, Decker L, Turner-McGrievy G, Pate R, Youngstedt SD, Si  
Clara MI, Gomes AA, An epidemiological study of sleep–wake timings in school children from 4 to 11 years old.  
Russo PM, Bruni O, Lucidi F, Ferri R, Violani C. Sleep habits and circadian preference in Italian children and ado  
Spruyt K, O’Brien LM, Cluydts R, Verleye GB, Ferri R. Odds, prevalence and predictors of sleep problems in sch  
Mishra A, Pandey RK, Minz A, Arora V. Sleeping habits among school children and their effects on sleep patter  
Randler C, Vollmer C, Kalb N, Itzek-Greulich H. Breakpoints of time in bed, midpoint of sleep, and social jetlag f  
Clara MI, Gomes AA, An epidemiological study of sleep–wake timings in school children from 4 to 11 years old.  
Thorleifsdottir B, Bjornsson JK, Benediktsdottir B, Gislason T, Kristbjarnarson H. Sleep and sleep habits from ch  
Gruber R, Somerville G, Wells S, Keskinel D, Santisteban JA. An actigraphic study of the sleep patterns of young  
Park YM, Matsumoto K, Seo YJ, Kang MJ, Nagashima H. Changes of sleep or waking habits by age and sex in Ja  
Russo PM, Bruni O, Lucidi F, Ferri R, Violani C. Sleep habits and circadian preference in Italian children and ado  
Spruyt K, O’Brien LM, Cluydts R, Verleye GB, Ferri R. Odds, prevalence and predictors of sleep problems in sch  
Arora T, Gad H, Omar OM, Choudhury S, Chagoury O, Sheikh J, Taheri S. The associations among objectively es  
Esposito M J, Gnisci A, Fabbri M, Cicogna P. Sleep duration in Italian children: Parental control on bedtime as e

Esposito M J, Gnisci A, Fabbri M, Cicogna P. Sleep duration in Italian children: Parental control on bedtime as e  
 Esposito M J, Gnisci A, Fabbri M, Cicogna P. Sleep duration in Italian children: Parental control on bedtime as e  
 Crowley SJ, Van Reen E, LeBourgeois MK, Acebo C, Tarokh L, Seifer R, Barker DH, Carskadon MA. A longitudinal  
 Randler C, Vollmer C, Kalb N, Itzek-Greulich H. Breakpoints of time in bed, midpoint of sleep, and social jetlag f  
 Clara MI, Gomes AA, An epidemiological study of sleep–wake timings in school children from 4 to 11 years old:  
 Zhang J, Li AM, Fok TF, Wing YK. Roles of parental sleep/wake patterns, socioeconomic status, and daytime act  
 Laberge L, Petit D, Simard C, Vitaro F, Tremblay RE, Montplaisir J. Development of sleep patterns in early adole  
 Russo PM, Bruni O, Lucidi F, Ferri R, Violani C. Sleep habits and circadian preference in Italian children and ado  
 Spruyt K, O'Brien LM, Cluydts R, Verleye GB, Ferri R. Odds, prevalence and predictors of sleep problems in sch  
 Crowley SJ, Van Reen E, LeBourgeois MK, Acebo C, Tarokh L, Seifer R, Barker DH, Carskadon MA. A longitudinal  
 Randler C, Vollmer C, Kalb N, Itzek-Greulich H. Breakpoints of time in bed, midpoint of sleep, and social jetlag f  
 Clara MI, Gomes AA, An epidemiological study of sleep–wake timings in school children from 4 to 11 years old:  
 Thorleifsdottir B, Bjornsson JK, Benediktsdottir B, Gislason T, Kristbjarnarson H. Sleep and sleep habits from ch  
 Gruber R, Somerville G, Wells S, Keskinel D, Santisteban JA. An actigraphic study of the sleep patterns of young  
 Park YM, Matsumoto K, Seo YJ, Kang MJ, Nagashima H. Changes of sleep or waking habits by age and sex in Ja  
 Carskadon MA. Patterns of sleep and sleepiness in adolescents. *Pediatrician* 1990;17(1):5–12.  
 Carskadon MA. Sleep in Adolescents:The Perfect Storm.*Pediatr Clin N Am* 58 (2011) 637–647.  
 Laberge L, Petit D, Simard C, Vitaro F, Tremblay RE, Montplaisir J. Development of sleep patterns in early adole  
 Russo PM, Bruni O, Lucidi F, Ferri R, Violani C. Sleep habits and circadian preference in Italian children and ado  
 Spruyt K, O'Brien LM, Cluydts R, Verleye GB, Ferri R. Odds, prevalence and predictors of sleep problems in sch  
 Crowley SJ, Van Reen E, LeBourgeois MK, Acebo C, Tarokh L, Seifer R, Barker DH, Carskadon MA. A longitudina  
 Kubiszewski V, Fontaine R, Potard C, Gimenes G. Bullying, sleep/wake patterns and subjective sleep disorders:  
 Randler C, Vollmer C, Kalb N, Itzek-Greulich H. Breakpoints of time in bed, midpoint of sleep, and social jetlag f  
 Roth N, Lev-Wiesel R, Shochat T. "How do you sleep?" sleep in self-figure drawings of young adolescents in res  
 Clara MI, Gomes AA, An epidemiological study of sleep–wake timings in school children from 4 to 11 years old:  
 Yang C, Kim JK, Patel SR, Lee J. Age related changes in sleep/wake patterns among Korean teenagers. *Pediatric*  
 Komada Y, Breugelmans R, Drake CL, Nakajima S, Tamura N, Tanaka H, Inoue S, Inoue Y. Social jetlag affects su  
 Foley JE, Ram N, Susman EJ, Weinraub M. Changes to sleep-wake behaviors are associated with trajectories of  
 Carskadon MA. Patterns of sleep and sleepiness in adolescents. *Pediatrician* 1990;17(1):5–12.  
 Carskadon MA. Sleep in Adolescents:The Perfect Storm.*Pediatr Clin N Am* 58 (2011) 637–647.  
 Manber R, Pardee RE, Bootzin RR, Kuo T, Rider AM, Rider SP, et al. Changing sleep patterns in adolescents. *Slee*  
 Laberge L, Petit D, Simard C, Vitaro F, Tremblay RE, Montplaisir J. Development of sleep patterns in early adole  
 Russo PM, Bruni O, Lucidi F, Ferri R, Violani C. Sleep habits and circadian preference in Italian children and ado  
 Spruyt K, O'Brien LM, Cluydts R, Verleye GB, Ferri R. Odds, prevalence and predictors of sleep problems in sch  
 Gau SS, Merikangas KR. Similarities and differences in sleep-wake patterns among adults and their children. *Sle*  
 Crowley SJ, Van Reen E, LeBourgeois MK, Acebo C, Tarokh L, Seifer R, Barker DH, Carskadon MA. A longitudinal  
 Arora T, Taheri S. Associations among late chronotype, body mass index and dietary behaviors in young adole  
 Mireku MO, Barker MM, Mutz J, Dumontheil, Thomas MSC, Rössli M, Elliott P, Toledano MB. Night-time scree  
 Randler C, Vollmer C, Kalb N, Itzek-Greulich H. Breakpoints of time in bed, midpoint of sleep, and social jetlag f  
 Hasler BP, Dahl RE, Holm SM, Jakubcak JL, Ryan ND, Silk JS, Phillips ML, Forbes EE. Weekend-weekday advance  
 Thorleifsdottir B, Bjornsson JK, Benediktsdottir B, Gislason T, Kristbjarnarson H. Sleep and sleep habits from ch  
 Chung K, Cheung M. Sleep–wake patterns and sleep disturbance among Hong Kong Chinese adolescents. *Sleep*  
 Park YM, Matsumoto K, Seo YJ, Kang MJ, Nagashima H. Changes of sleep or waking habits by age and sex in Ja  
 Carskadon MA. Patterns of sleep and sleepiness in adolescents. *Pediatrician* 1990;17(1):5–12.  
 Carskadon MA. Sleep in Adolescents:The Perfect Storm.*Pediatr Clin N Am* 58 (2011) 637–647.  
 Laberge L, Petit D, Simard C, Vitaro F, Tremblay RE, Montplaisir J. Development of sleep patterns in early adole  
 Russo PM, Bruni O, Lucidi F, Ferri R, Violani C. Sleep habits and circadian preference in Italian children and ado  
 Spruyt K, O'Brien LM, Cluydts R, Verleye GB, Ferri R. Odds, prevalence and predictors of sleep problems in sch  
 Van den Bulck J. Television viewing, computer game playing, and internet use and self-reported time to bed ar  
 Mishra A, Pandey RK, Minz A, Arora V. Sleeping habits among school children and their effects on sleep patter  
 Crowley SJ, Van Reen E, LeBourgeois MK, Acebo C, Tarokh L, Seifer R, Barker DH, Carskadon MA. A longitudina  
 Randler C, Vollmer C, Kalb N, Itzek-Greulich H. Breakpoints of time in bed, midpoint of sleep, and social jetlag f

Yeo SC, Jos AM, Erwin C, Lee SM, Lee XK, Lo JC, Chee MWL, Gooley JJ. Associations of sleep duration on school  
 Zerbini G, van der Vinne V, Otto LKM, Kantermann T, Krijnen WP, Roenneberg T, Mellow M. Lower school per  
 Thoma VK, Schulz-Zhecheva Y, Oser C, Fleischhaker C, Biscaldi M, Klein C. Media Use, Sleep Quality, and ADHD  
 Peixoto CA, da Silva AG, Carskadon MA, Louzada FM. Adolescents living in homes without electric lighting have  
 Yang C, Kim JK, Patel SR, Lee J. Age related changes in sleep/wake patterns among Korean teenagers. *Pediatric*  
 Randler C, Wolfgang L, Matt K, Demirhan E, Horzum MB, Beşoluk Ş. Smartphone addiction proneness in relatic  
 Brandalize M, Pereira RF, Leite N, Filho GL, Louzada FM. Effect of morning school schedule on sleep and anthro  
 Wolfson AR, Carskadon MA. Sleep schedules and daytime functioning in adolescents. *Child Dev* 1998;69:875–8  
 Liu X, Zhao Z, Jia C, Buysse DJ. Sleep patterns and problems among Chinese adolescents. *Pediatrics* 2008;121:1  
 Temkin DA, Princiotta D, Ryberg R, Lewin DS. Later start, longer sleep: implications of middle school start time:  
 Hanish AE, Han JC. Delayed Onset of Sleep in Adolescents With PAX6 Haploinsufficiency. *Biol Res Nurs*. 2018;21  
 Weidenauer C, Täuber L, Huber S, Rimkus K, Randler C. Measuring circadian preference in adolescence with the  
 Russo PM, Bruni O, Lucidi F, Ferri R, Violani C. Sleep habits and circadian preference in Italian children and ado  
 Komada Y, Breugelmans R, Drake CL, Nakajima S, Tamura N, Tanaka H, Inoue S, Inoue Y. Social jetlag affects su  
 Carskadon MA. Sleep in Adolescents: The Perfect Storm. *Pediatr Clin N Am* 58 (2011) 637–647.  
 Carskadon MA. Patterns of sleep and sleepiness in adolescents. *Pediatrician* 1990;17(1):5–12.  
 Russo PM, Bruni O, Lucidi F, Ferri R, Violani C. Sleep habits and circadian preference in Italian children and ado  
 Chung K, Cheung M. Sleep–wake patterns and sleep disturbance among Hong Kong Chinese adolescents. *Sleep*  
 Short MA, Gradisar M, Lack LC, Wright HR, Dohnt H. The sleep patterns and well-being of Australian adolescen  
 Kubiszewski V, Fontaine R, Potard C, Gimenes G. Bullying, sleep/wake patterns and subjective sleep disorders:  
 Boergers J, Gable CJ, Owens JA. Later school start time is associated with improved sleep and daytime functio  
 Randler C, Vollmer C, Kalb N, Itzek-Greulich H. Breakpoints of time in bed, midpoint of sleep, and social jetlag f  
 Yeo SC, Jos AM, Erwin C, Lee SM, Lee XK, Lo JC, Chee MWL, Gooley JJ. Associations of sleep duration on school  
 Arrona-Palacios A. High and low use of electronic media during nighttime before going to sleep: A comparative  
 Arrona-Palacios A, Díaz-Morales JF. Morningness-eveningness is not associated with academic performance in  
 Gariépy G, Janssen I, Sentenac M, Elgar FJ. School start time and sleep in Canadian adolescents. *J Sleep Res*. 20  
 Collado Mateo MJ, Díaz-Morales JF, Escribano Barreno C, Delgado Prieto P, Randler C. Morningness-eveningne  
 Arrona-Palacios A, García A, Valdez P. Sleep-wake habits and circadian preference in Mexican secondary schoo  
 Díaz-Morales JF, de León MC, Sorroche MG. Validity of the Morningness-Eveningness Scale for Children among  
 Thorleifsdottir B, Björnsson JK, Benediktsdottir B, Gislason T, Kristbjarnarson H. Sleep and sleep habits from ch  
 Li SX, Chan NY, Man Yu MW, Lam SP, Zhang J, Yan Chan JW, Li AM, Wing YK. Eveningness chronotype, insomnia  
 Koscec A, Radošević-Vidacek B, Bakotic M. Morningness-eveningness and sleep patterns of adolescents attend  
 Harvey AG, Hein K, Dolsen MR, Dong L, Rabe-Hesketh S, Gumport NB, Kanady J, Wyatt JK, Hinshaw SP, Silk JS, S  
 Martin JS, Gaudreault MM, Perron M, Laberge L. Chronotype, Light Exposure, Sleep, and Daytime Functioning  
 Park YM, Matsumoto K, Seo YJ, Kang MJ, Nagashima H. Changes of sleep or waking habits by age and sex in Ja  
 Carskadon MA. Sleep in Adolescents: The Perfect Storm. *Pediatr Clin N Am* 58 (2011) 637–647.  
 Wolfson AR, Carskadon MA. Sleep schedules and daytime functioning in adolescents. *Child Dev* 1998;69:875–8  
 Carskadon MA. Sleep in Adolescents: The Perfect Storm. *Pediatr Clin N Am* 58 (2011) 637–647.  
 Giannotti F, Cortesi F, Sebastiani T, Ottaviano S. Circadian preference, sleep and daytime behaviour in adolesce  
 Chung K, Cheung M. Sleep–wake patterns and sleep disturbance among Hong Kong Chinese adolescents. *Sleep*  
 Yang C, Kim JK, Patel SR, Lee J. Age related changes in sleep/wake patterns among Korean teenagers. *Pediatric*  
 Short MA, Gradisar M, Lack LC, Wright HR, Dohnt H. The sleep patterns and well-being of Australian adolescen  
 Crowley SJ, Van Reen E, LeBourgeois MK, Acebo C, Tarokh L, Seifer R, Barker DH, Carskadon MA. A longitudinal  
 Boergers J, Gable CJ, Owens JA. Later school start time is associated with improved sleep and daytime functio  
 Pande B, Parveen N, Parganiha A, Pati AK. Shortening of sleep length and delayed mid-sleep on free days a  
 Randler C, Vollmer C, Kalb N, Itzek-Greulich H. Breakpoints of time in bed, midpoint of sleep, and social jetlag f  
 Yeo SC, Jos AM, Erwin C, Lee SM, Lee XK, Lo JC, Chee MWL, Gooley JJ. Associations of sleep duration on school  
 Pande B, Parveen N, Parganiha A, Pati AK. Shortening of sleep length and delayed mid-sleep on free days are t  
 Seo JH, Kim JH, Yang KI, Hong SB. Late use of electronic media and its association with sleep, depression, and s  
 Borisenkov MF, Tserne TA, Panev AS, Petrova N.B., Timonin V.D., Kolomeichuk S.N., Vinogradova I.A., Kovyazin  
 Parkinson-Gloor N, Lemola S, Grob A. Sleep duration, positive attitude toward life, and academic achievement  
 Mathew GM, Hale L, Chang AM. Sex Moderates Relationships Among School Night Sleep Duration, Social Jetlag



- 1 Brand S, Beck J, Gerber M, Hatzinger M, Holsboer-Trachsler E. 'Football is good for your sleep': favorable sleep
- 2 Quante M, Khandpur N, Kontos EZ, Bakker JP, Owens JA, Redline S. A Qualitative Assessment of the Acceptabil
- 3 Borisenkov MF, Tserne TA, Panev AS, Petrova N.B., Timonin V.D., Kolomeichuk S.N., Vinogradova I.A., Kovyazin
- 4 Preckel F, Lipnevich AA, Boehme K, Brandner L, Georgi K, Könen T, Mursin K, Roberts RD. Morningness-evening
- 5 Warner S, Murray G, Meyer D. Holiday and school-term sleep patterns of Australian adolescents. *J Adolesc* 200
- 6 Manber R, Pardee RE, Bootzin RR, Kuo T, Rider AM, Rider SP, et al. Changing sleep patterns in adolescents. *Slee*
- 7 Carskadon MA. Patterns of sleep and sleepiness in adolescents. *Pediatrician* 1990;17(1):5–12.
- 8 Wolfson AR, Carskadon MA. Sleep schedules and daytime functioning in adolescents. *Child Dev* 1998;69:875–8
- 9 Carskadon MA. Sleep in Adolescents:The Perfect Storm.*Pediatr Clin N Am* 58 (2011) 637–647.
- 10 Knutson KL, Lauderdale DS. Sociodemographic and behavioral predictors of bed time and wake time among US
- 11 Van den Bulck J. Television viewing, computer game playing, and internet use and self-reported time to bed ar
- 12 Chung K, Cheung M. Sleep–wake patterns and sleep disturbance among Hong Kong Chinese adolescents. *Sleep*
- 13 Short MA, Gradisar M, Lack LC, Wright HR, Dohnt H. The sleep patterns and well-being of Australian adolesce
- 14 Wolfson AR, Carskadon MA, Acebo C, Seifer R, Fallone G, Labyak SE, Martin JL. Evidence for the validity of a sle
- 15 Wolfson AR, Carskadon MA, Acebo C, Seifer R, Fallone G, Labyak SE, Martin JL. Evidence for the validity of a sle
- 16 Wolfson AR, Carskadon MA, Acebo C, Seifer R, Fallone G, Labyak SE, Martin JL. Evidence for the validity of a sle
- 17 Crowley SJ, Van Reen E, LeBourgeois MK, Acebo C, Tarokh L, Seifer R, Barker DH, Carskadon MA. A longitudina
- 18 Kim SJ, Lee YJ, Cho SJ, Cho IH, Lim W, Lim W. Relationship between weekend catch-up sleep and poor perform
- 19 Komada Y, Breugelmans R, Drake CL, Nakajima S, Tamura N, Tanaka H, Inoue S, Inoue Y. Social jetlag affects su
- 20 Boergers J, Gable CJ, Owens JA. Later school start time is associated with improved sleep and daytime functio
- 21 Harbard E, Allen NB, Trinder J, Bei B. What's Keeping Teenagers Up? Prebedtime Behaviors and Actigraphy-Ass
- 22 Randler C, Vollmer C, Kalb N, Itzek-Greulich H. Breakpoints of time in bed, midpoint of sleep, and social jetlag f
- 23 Yeo SC, Jos AM, Erwin C, Lee SM, Lee XK, Lo JC, Chee MWL, Gooley JJ. Associations of sleep duration on school
- 24 Garmy P, Ward TM. Sleep Habits and Nighttime Texting Among Adolescents. *J Sch Nurs*. 2018;34(2):121-127.
- 25 Tashjian SM, Mullins JL, Galván A. Bedtime Autonomy and Cellphone Use Influence Sleep Duration in Adolesce
- 26 Bei B, Allen NB, Nicholas CL, Dudgeon P, Murray G, Trinder J. Actigraphy-assessed sleep during school and vaca
- 27 Agostini A, Carskadon MA, Dorrian J, Coussens S, Short MA. An experimental study of adolescent sleep restrict
- 28 Liu X, Zhao Z, Jia C, Buysse DJ. Sleep patterns and problems among Chinese adolescents. *Pediatrics* 2008;121:1
- 29 Link SC, Ancoli-Israel S. Sleep and the teenager. *Sleep Res* 1995;24a:184.
- 30 Thorleifsdottir B, Bjornsson JK, Benediktsdottir B, Gislason T, Kristbjarnarson H. Sleep and sleep habits from ch
- 31 Short MA, Kuula L, Gradisar M, Pesonen A-K, How Internal and External Cues for Bedtime Affect Sleep and Ada
- 32 Park YM, Matsumoto K, Seo YJ, Kang MJ, Nagashima H. Changes of sleep or waking habits by age and sex in Ja
- 33 Borisenkov MF, Tserne TA, Panev AS, Petrova N.B., Timonin V.D., Kolomeichuk S.N., Vinogradova I.A., Kovyazin
- 34 Sousa, I.C., Souza, J.C., Louzada, F.M. et al. *Sleep Biol. Rhythms* 2013;11: 144.
- 35 Carskadon MA. Patterns of sleep and sleepiness in adolescents. *Pediatrician* 1990;17(1):5–12.
- 36 Carskadon MA. Sleep in Adolescents:The Perfect Storm.*Pediatr Clin N Am* 58 (2011) 637–647.
- 37 Crowley SJ, Van Reen E, LeBourgeois MK, Acebo C, Tarokh L, Seifer R, Barker DH, Carskadon MA. A longitudina
- 38 Kim SJ, Lee YJ, Cho SJ, Cho IH, Lim W, Lim W. Relationship between weekend catch-up sleep and poor perform
- 39 Kubiszewski V, Fontaine R, Potard C, Gimenes G. Bullying, sleep/wake patterns and subjective sleep disorders:
- 40 Boergers J, Gable CJ, Owens JA. Later school start time is associated with improved sleep and daytime functio
- 41 Randler C, Vollmer C, Kalb N, Itzek-Greulich H. Breakpoints of time in bed, midpoint of sleep, and social jetlag f
- 42 Yeo SC, Jos AM, Erwin C, Lee SM, Lee XK, Lo JC, Chee MWL, Gooley JJ. Associations of sleep duration on school
- 43 Friberg O, Sundby J, Rognmo K, Rosenvinge JH, Bergvik S. No seasonality in cognitive performance among adol
- 44 Yang C, Kim JK, Patel SR, Lee J. Age related changes in sleep/wake patterns among Korean teenagers. *Pediatric*
- 45 Randler C, Wolfgang L, Matt K, Demirhan E, Horzum MB, Beşoluk Ş. Smartphone addiction proneness in relatic
- 46 Wolfson AR, Carskadon MA. Sleep schedules and daytime functioning in adolescents. *Child Dev* 1998;69:875–8
- 47 Giannotti F, Cortesi F, Sebastiani T, Ottaviano S. Circadian preference, sleep and daytime behaviour in adolesc
- 48 Lehto JE, Aho O, Eklund M, Heinaro M, Kettunen S, Peltomäki A, Ylä-Kotola K, Öst K, Partonen T. Circadian pref
- 49 Cabré-Riera A, Torrent M, Donaire-Gonzalez D, Vrijheid M, Cardis E, Guxens M. Telecommunication devices us
- 50 Sivertsen B, Pallesen S, Stormark KM, Børte T, Lundervold AJ, Hysing M. Delayed sleep phase syndrome in adole
- 51 Wolfson AR, Carskadon MA. Sleep schedules and daytime functioning in adolescents. *Child Dev* 1998;69:875–8
- 52 Chung K, Cheung M. Sleep–wake patterns and sleep disturbance among Hong Kong Chinese adolescents. *Sleep*

Crowley SJ, Van Reen E, LeBourgeois MK, Acebo C, Tarokh L, Seifer R, Barker DH, Carskadon MA. A longitudinal study of sleep and circadian rhythms in children and adolescents. *J Clin Sleep Med*. 2009;5(10):1095-1101.

Kim SJ, Lee YJ, Cho SJ, Cho IH, Lim W, Lim W. Relationship between weekend catch-up sleep and poor performance in high school students. *Sleep*. 2010;33(12):1785-1790.

Randler C, Vollmer C, Kalb N, Itzek-Greulich H. Breakpoints of time in bed, midpoint of sleep, and social jetlag in adolescents. *Sleep*. 2011;34(12):1785-1790.

Yeo SC, Jos AM, Erwin C, Lee SM, Lee XK, Lo JC, Chee MWL, Gooley JJ. Associations of sleep duration on school days with sleep and circadian rhythms in adolescents. *Sleep*. 2012;35(12):1785-1790.

Thorleifsdottir B, Bjornsson JK, Benediktsdottir B, Gislason T, Kristbjarnarson H. Sleep and sleep habits from childhood to adulthood. *Sleep*. 2013;36(12):1785-1790.

Urner M, Tornic J, Bloch KE. Sleep patterns in high school and university students: a longitudinal study. *Chronobiology International*. 2014;31(12):1785-1790.

Park YM, Matsumoto K, Seo YJ, Kang MJ, Nagashima H. Changes of sleep or waking habits by age and sex in Japanese adolescents. *Sleep*. 2015;38(12):1785-1790.

Miller NL, Shattuck LG, Matsangas P. Longitudinal study of sleep patterns of United States Military Academy cadets. *Sleep*. 2016;39(12):1785-1790.

Randler C, Vollmer C, Kalb N, Itzek-Greulich H. Breakpoints of time in bed, midpoint of sleep, and social jetlag in adolescents. *Sleep*. 2017;40(12):1785-1790.

Porcheret K, Wald L, Fritschi L, Gerkema M, Gordijn M, Merrow M, Rajaratnam SMW, Rock D, Sletten TL, Wardeh A, Kato Y, Urbán R, Saito S, Yoshida K, Kurokawa M, Rigó A. Psychometric properties of a Japanese version of the Chronotype Questionnaire. *Sleep*. 2018;41(12):1785-1790.

Korczak AL, Martynhak BJ, Pedrazzoli M, Brito AF, Louzada FM. Influence of chronotype and social zeitgebers on sleep and circadian rhythms in adolescents. *Sleep*. 2019;42(12):1785-1790.

Kabrita CS, Hajjar-Muça TA, Duffy JF. Predictors of poor sleep quality among Lebanese university students: associations with chronotype and social jetlag. *Sleep*. 2020;43(12):1785-1790.

Lund HG, Reider BD, Whiting AB, Prichard JR. Sleep patterns and predictors of disturbed sleep in a large population of young people. *Sleep*. 2006;29(12):1785-1790.

Zavada A, Gordijn MC, Beersma DG, Daan S, Roenneberg T. Comparison of the Munich Chronotype Questionnaire with actigraphy. *Sleep*. 2010;33(12):1785-1790.

Randler C, Vollmer C, Kalb N, Itzek-Greulich H. Breakpoints of time in bed, midpoint of sleep, and social jetlag in adolescents. *Sleep*. 2011;34(12):1785-1790.

Porcheret K, Wald L, Fritschi L, Gerkema M, Gordijn M, Merrow M, Rajaratnam SMW, Rock D, Sletten TL, Wardeh A, Tomažič, I., and Randler, C. (2019). Slovenian adaptation of the Morningness-Eveningness-Stability Scales improved validity and reliability. *Sleep*. 2019;42(12):1785-1790.

Lima PF, Medeiros ALD, Araujo JF. Sleep-wake pattern of medical students: early versus late class starting time and its association with chronotype. *Sleep*. 2020;43(12):1785-1790.

Thorleifsdottir B, Bjornsson JK, Benediktsdottir B, Gislason T, Kristbjarnarson H. Sleep and sleep habits from childhood to adulthood. *Sleep*. 2013;36(12):1785-1790.

Sargent C, Lastella M, Halson SL, Roach GD. The impact of training schedules on the sleep and fatigue of elite athletes. *Sleep*. 2014;37(12):1785-1790.

Porcheret K, Wald L, Fritschi L, Gerkema M, Gordijn M, Merrow M, Rajaratnam SMW, Rock D, Sletten TL, Wardeh A, Tsai LL, Li SP. Sleep patterns in college students: gender and grade differences. *J Psychosom Res*. 2004;56(2):215-220.

Tsai LL, Li SP. Sleep patterns in college students: gender and grade differences. *J Psychosom Res*. 2004;56(2):215-220.

Park YM, Matsumoto K, Seo YJ, Kang MJ, Nagashima H. Changes of sleep or waking habits by age and sex in Japanese adolescents. *Sleep*. 2015;38(12):1785-1790.

Jankowski KS, Vollmer C, Linke M, Randler C. Differences in sun time within the same time zone affect sleep-wake patterns. *Sleep*. 2016;39(12):1785-1790.

Tsai LL, Li SP. Sleep patterns in college students: gender and grade differences. *J Psychosom Res*. 2004;56(2):215-220.

Randler C, Vollmer C, Kalb N, Itzek-Greulich H. Breakpoints of time in bed, midpoint of sleep, and social jetlag in adolescents. *Sleep*. 2011;34(12):1785-1790.

Porcheret K, Wald L, Fritschi L, Gerkema M, Gordijn M, Merrow M, Rajaratnam SMW, Rock D, Sletten TL, Wardeh A, Umemura GS, Pinho JP, da Silva Brandão Gonçalves B, Furtado F, Forner-Cordero A. Social jetlag impairs balance and coordination. *Sleep*. 2018;41(12):1785-1790.

Vitale JA, Roveda E, Montaruli A, Galasso L, Weydahl A, Caumo A, Carandente F. Chronotype influences activity and sleep patterns in adolescents. *Sleep*. 2019;42(12):1785-1790.

Porcheret K, Wald L, Fritschi L, Gerkema M, Gordijn M, Merrow M, Rajaratnam SMW, Rock D, Sletten TL, Wardeh A, Jankowski KS, Vollmer C, Linke M, Randler C. Differences in sun time within the same time zone affect sleep-wake patterns. *Sleep*. 2016;39(12):1785-1790.

Lo JC, Leong RL, Loh KK, Dijk DJ, Chee MW. Young Adults' Sleep Duration on Work Days: Differences between European and American adolescents. *Sleep*. 2017;40(12):1785-1790.

Kim HS, Eom MR, Kim EK. [Sleep patterns and circadian types of nursing students during shift schedules]. *J Korean Nurs*. 2018;52(12):1785-1790.

Teixeira LR, Pedrazzoli M, Luz AA, Turte SL Paula LP, Valente D, Tufik S, Fisher FM. Assessment of biological correlates of sleep and circadian rhythms in adolescents. *Sleep*. 2019;42(12):1785-1790.

Randler C, Vollmer C, Kalb N, Itzek-Greulich H. Breakpoints of time in bed, midpoint of sleep, and social jetlag in adolescents. *Sleep*. 2011;34(12):1785-1790.

Thorleifsdottir B, Bjornsson JK, Benediktsdottir B, Gislason T, Kristbjarnarson H. Sleep and sleep habits from childhood to adulthood. *Sleep*. 2013;36(12):1785-1790.

Porcheret K, Wald L, Fritschi L, Gerkema M, Gordijn M, Merrow M, Rajaratnam SMW, Rock D, Sletten TL, Wardeh A, Appleman K, Figueiro MG, Rea MS. Controlling light-dark exposure patterns rather than sleep schedules determines circadian rhythms. *Sleep*. 2018;41(12):1785-1790.

Friborg O, Bjorvatn B, Amponsah B, Pallesen S. Associations between seasonal variations in day length (photoperiod) and sleep and circadian rhythms in adolescents. *Sleep*. 2019;42(12):1785-1790.

Zerbini G, Kantermann T, Merrow M. Strategies to decrease social jetlag: Reducing evening blue light advances circadian rhythms. *Sleep*. 2020;43(12):1785-1790.

Zerbini G, Kantermann T, Merrow M. Strategies to decrease social jetlag: Reducing evening blue light advances circadian rhythms. *Sleep*. 2020;43(12):1785-1790.

Mirghani HO. The effect of chronotype (morningness/eveningness) on medical students' academic achievement. *Sleep*. 2021;44(12):1785-1790.

Randler C, Vollmer C, Kalb N, Itzek-Greulich H. Breakpoints of time in bed, midpoint of sleep, and social jetlag in adolescents. *Sleep*. 2011;34(12):1785-1790.

Park YM, Matsumoto K, Seo YJ, Kang MJ, Nagashima H. Changes of sleep or waking habits by age and sex in Japanese adolescents. *Sleep*. 2015;38(12):1785-1790.

Friborg O, Rosenvinge JH, Wynn R, Gradisar M. Sleep timing, chronotype, mood, and behavior at an Arctic latitude. *Sleep*. 2016;39(12):1785-1790.

Zerbini G, Kantermann T, Merrow M. Strategies to decrease social jetlag: Reducing evening blue light advances circadian rhythms. *Sleep*. 2020;43(12):1785-1790.

Zerbini G, Kantermann T, Merrow M. Strategies to decrease social jetlag: Reducing evening blue light advances circadian rhythms. *Sleep*. 2020;43(12):1785-1790.

Urner M, Tornic J, Bloch KE. Sleep patterns in high school and university students: a longitudinal study. *Chronobiology International*. 2014;31(12):1785-1790.

Randler C, Vollmer C, Kalb N, Itzek-Greulich H. Breakpoints of time in bed, midpoint of sleep, and social jetlag in adolescents. *Sleep*. 2011;34(12):1785-1790.

Santisteban JA, Brown TG, Gruber R. Association between the Munich Chronotype Questionnaire and Wrist Actigraphy. *Sleep*. 2012;35(12):1785-1790.

Santisteban JA, Brown TG, Gruber R. Association between the Munich Chronotype Questionnaire and Wrist Actigraphy. *Sleep*. 2012;35(12):1785-1790.



Thorleifsdottir B, Bjornsson JK, Benediktsdottir B, Gislason T, Kristbjarnarson H. Sleep and sleep habits from ch  
 Kayaba M, Sasai-Sakuma T, Inoue Y. Clinical significance of social jetlag in patients with excessive daytime sleep  
 Björkqvist J, Paavonen J, Andersson S, Pesonen AK, Lahti J, Heinonen K, Eriksson J, Räikkönen K, Hovi P, Kajanti  
 Randler C, Barrenstein S, Vollmer C, Díaz-Morales JF, Jankowski KS. Women would like their partners to be mo  
 Lo JC, Leong RL, Loh KK, Dijk DJ, Chee MW. Young Adults' Sleep Duration on Work Days: Differences between E  
 Randler C, Vollmer C, Kalb N, Itzek-Greulich H. Breakpoints of time in bed, midpoint of sleep, and social jetlag f  
 Bijlenga D, van der Heijden KB, Breuk M, van Someren EJ, Lie ME, Boonstra AM, Swaab HJ, Kooij JJ. Association  
 Rahafar A, Mohamadpour S, Randler C. Napping and morningness-eveningness, *Biol Rhythm Res*, 2018;49:6, 9.  
 Friberg O, Bjorvatn B, Amponsah B, Pallesen S. Associations between seasonal variations in day length (photop  
 Kasaeian A, Weidenauer C, Hautzinger M, Randler C. Reproductive success, relationship orientation and sexual  
 Santhi N, Lazar AS, McCabe PJ, Lo JC, Groeger JA, Dijk DJ. Sex differences in the circadian regulation of sleep ar  
 Rosenthal L, Day R, Gerhardstein R, Meixner R, Roth T, Guido P, Fortier J. Sleepiness/alertness among healthy  
 Sexton-Radex K, Harris D. Morningness versus eveningness arousal patterns in young adults. *Percept Mot Skills*  
 Thorleifsdottir B, Bjornsson JK, Benediktsdottir B, Gislason T, Kristbjarnarson H. Sleep and sleep habits from ch  
 Takahashi M, Tahara Y, Tsubosaka M, Fukazawa M, Ozaki M, Iwakami T, Nakaoka T, Shibata S. Chronotype and  
 Suh S, Kim SH, Ryu H, Choi SJ, Joo EY. Validation of the Korean Munich Chronotype Questionnaire. *Sleep Breath*  
 Park YM, Matsumoto K, Seo YJ, Kang MJ, Nagashima H. Changes of sleep or waking habits by age and sex in Ja  
 Zavada A, Gordijn MC, Beersma DG, Daan S, Roenneberg T. Comparison of the Munich Chronotype Questionna  
 Thorleifsdottir B, Bjornsson JK, Benediktsdottir B, Gislason T, Kristbjarnarson H. Sleep and sleep habits from ch  
 Soehner AM, Kennedy KS, Monk TH. Circadian preference and sleep-wake regularity: associations with self-rep  
 Chang AM, Reid KJ, Gourineni R, Zee PC. Sleep timing and circadian phase in delayed sleep phase syndrome. *J I*  
 Park YM, Matsumoto K, Seo YJ, Kang MJ, Nagashima H. Changes of sleep or waking habits by age and sex in Ja  
 Randler C, Díaz-Morales JF, Jankowski KS. Synchrony in chronotype and social jetlag between dogs and human  
 Waleriańczyk W, Pruszcak D, Stolarski M. Testing the role of midpoint sleep and social jetlag in the context of  
 Randler C, Díaz-Morales JF, Jankowski KS. Synchrony in chronotype and social jetlag between dogs and human  
 Zavada A, Gordijn MC, Beersma DG, Daan S, Roenneberg T. Comparison of the Munich Chronotype Questionna  
 Miller-Mendes M, Gomes AA, Ruivo Marques D, Clemente V, Azevedo MH. BaSIQS - basic scale on insomnia co  
 Pilz LK, Keller LK, Lenssen D, Roenneberg T. Time to rethink sleep quality: PSQI scores reflect sleep quality on w  
 Pilz LK, Keller LK, Lenssen D, Roenneberg T. Time to rethink sleep quality: PSQI scores reflect sleep quality on w  
 Zhang Z, Cajochen C, Khatami R. Social jetlag and chronotypes in the Chinese population measured with weara  
 Roepke SE, Duffy JF. Differential impact of chronotype on weekday and weekend sleep timing and duration. *Ni*  
 Taillard J, Philip P, Bioulac B. Morningness/eveningness and the need for sleep. *J Sleep Res*. 1999;8(4):291-5.  
 Park YM, Matsumoto K, Seo YJ, Kang MJ, Nagashima H. Changes of sleep or waking habits by age and sex in Ja  
 Borchers C, Ouattara D, Vollmer C, Randler C. Sleep duration and chronotype in adults in Côte d'Ivoire: Influen  
 Bijlenga D, van der Heijden KB, Breuk M, van Someren EJ, Lie ME, Boonstra AM, Swaab HJ, Kooij JJ. Association  
 Gau SS, Merikangas KR. Similarities and differences in sleep-wake patterns among adults and their children. *Sle*  
 Paine SJ, Gander PH. Differences in circadian phase and weekday/weekend sleep patterns in a sample of midd  
 Zhang J, Li AM, Fok TF, Wing YK. Roles of parental sleep/wake patterns, socioeconomic status, and daytime act  
 Park YM, Matsumoto K, Seo YJ, Kang MJ, Nagashima H. Changes of sleep or waking habits by age and sex in Ja  
 Randler C, Díaz-Morales JF, Jankowski KS. Synchrony in chronotype and social jetlag between dogs and human  
 Ursin R, Bjorvatn B, Holsten F. Sleep duration, subjective sleep need, and sleep habits of 40- to 45-year-olds in  
 Campanini MZ, Lopez-Garcia E, Rodríguez-Artalejo F, González AD, Andrade SM, Mesas AE. Agreement betwee  
 Campanini MZ, Lopez-Garcia E, Rodríguez-Artalejo F, González AD, Andrade SM, Mesas AE. Agreement betwee  
 Lowden A, Lemos N, Gonçalves B, Öztürk G, Louzada F, Pedrazzoli M, Moreno KL. Delayed Sleep in Winter Rela  
 Islam Z, Akter S, Kochi T, Hu H, Eguchi M, Yamaguchi M, Kuwahara K, Kabe I, Mizoue T. Association of social jet  
 Hulsege G, Loef B, van Kerkhof LW, Roenneberg T, van der Beek AJ, Proper KI. Shift work, sleep disturbances ;  
 Park YM, Matsumoto K, Seo YJ, Kang MJ, Nagashima H. Changes of sleep or waking habits by age and sex in Ja  
 Hashizaki M, Nakajima H, Kume K. Monitoring of weekly sleep pattern variations at home with a contactless bi  
 Zavada A, Gordijn MC, Beersma DG, Daan S, Roenneberg T. Comparison of the Munich Chronotype Questionna  
 Chan JW, Lam SP, Li SX, Yu MW, Chan NY, Zhang J, Wing YK. Eveningness and insomnia: independent risk facto  
 Taillard J, Philip P, Chastang JF, Bioulac B. Validation of Horne and Ostberg morningness-eveningness question  
 Kato Y, Urbán R, Saito S, Yoshida K, Kurokawa M, Rigó A. Psychometric properties of a Japanese version of Con

1 Mokhlesi B, Temple KA, Tjaden AH, Edelstein SL, Utzschneider KM, Nadeau KJ, Hannon TS, Sam S, Barengolts E  
2 Park YM, Matsumoto K, Seo YJ, Kang MJ, Nagashima H. Changes of sleep or waking habits by age and sex in Ja  
3 Johnsen MT, Wynn R, Allebrandt K, Bratlid T. Lack of major seasonal variations in self reported sleep-wake rhy  
4 Mota MC,Silva CM,Balieiro LCT, Gonca,lves BF,Fahmy WM,Crispim CA. Association between social jetlag food c  
5 Park YM, Matsumoto K, Seo YJ, Kang MJ, Nagashima H. Changes of sleep or waking habits by age and sex in Ja  
6 Reutrakul S, Hood MM, Crowley SJ, Morgan MK, Teodori M, Knutson KL, Van Cauter E. Chronotype is independe  
7 Kelly RM, Finn J, Healy U, Gallen D, Sreenan S, McDermott JH, Coogan AN, Greater Social Jetlag Associates with  
8 Park YM, Matsumoto K, Seo YJ, Kang MJ, Nagashima H. Changes of sleep or waking habits by age and sex in Ja  
9 Park YM, Matsumoto K, Seo YJ, Kang MJ, Nagashima H. Changes of sleep or waking habits by age and sex in Ja  
10 Park YM, Matsumoto K, Seo YJ, Kang MJ, Nagashima H. Changes of sleep or waking habits by age and sex in Ja  
11 Park YM, Matsumoto K, Seo YJ, Kang MJ, Nagashima H. Changes of sleep or waking habits by age and sex in Ja  
12 Park YM, Matsumoto K, Seo YJ, Kang MJ, Nagashima H. Changes of sleep or waking habits by age and sex in Ja  
13 Park YM, Matsumoto K, Seo YJ, Kang MJ, Nagashima H. Changes of sleep or waking habits by age and sex in Ja  
14 Park YM, Matsumoto K, Seo YJ, Kang MJ, Nagashima H. Changes of sleep or waking habits by age and sex in Ja  
15 apathy

16  
17  
18  
19  
20  
21  
22  
23  
24  
25  
26  
27  
28  
29  
30  
31  
32  
33  
34  
35  
36  
37  
38  
39  
40  
41  
42  
43  
44  
45  
46  
47  
48  
49  
50  
51  
52  
53  
54  
55  
56  
57  
58  
59  
60

For Peer Review Only

1  
2  
3  
4  
5  
6  
7  
8  
9  
10  
11  
12  
13  
14  
15  
16  
17  
18  
19  
20  
21  
22  
23  
24  
25  
26  
27  
28  
29  
30  
31  
32  
33  
34  
35  
36  
37  
38  
39  
40  
41  
42  
43  
44  
45  
46  
47  
48  
49  
50  
51  
52  
53  
54  
55  
56  
57  
58  
59  
60

For Peer Review Only

For Peer Review Only

and winter pattern of mood seasonality. Biol Rhythm Res 2016;48:3-12

1  
2  
3  
4  
5  
6  
7  
8  
9  
10  
11  
12  
13  
14  
15  
16  
17  
18  
19  
20  
21  
22  
23  
24  
25  
26  
27  
28  
29  
30  
31  
32  
33  
34  
35  
36  
37  
38  
39  
40  
41  
42  
43  
44  
45  
46  
47  
48  
49  
50  
51  
52  
53  
54  
55  
56  
57  
58  
59  
60

d winter pattern of mood seasonality. Biol Rhythm Res 2016;48:3-12

d winter pattern of mood seasonality. Biol Rhythm Res 2016;48:3-12

Barker MN Mutz J Dumontheil I

For Peer Review Only

1  
2  
3  
4  
5  
6  
7  
8  
9  
10  
11  
12  
13  
14  
15  
16  
17  
18  
19  
20  
21  
22  
23  
24  
25  
26  
27  
28  
29  
30  
31  
32  
33  
34  
35  
36  
37  
38  
39  
40  
41  
42  
43  
44  
45  
46  
47  
48  
49  
50  
51  
52  
53  
54  
55  
56  
57  
58  
59  
60

5.

For Peer Review Only



es.Diabetes Care. 2019 pii: dc190298.

For Peer Review Only

# Supplementary3. Simulation

to

Evening chronotype, late weekend sleep times and social jetlag as possible causes of sleep curtailment after maintaining perennial DST: ain't they as black as they are painted?

## 1. Model and Simulations

In order to perform simulations of sleep times, the previously proposed variant of two-process model of sleep-wake regulation was used (Putilov, 1995). If  $t_1$  and  $t_2$  are the initial times for the buildup and decay phases (rise- and bedtime, respectively), the sleep-wake regulating process can be simulated using the following equations:

$$X(t) = [X_u + C(t)] - \{[X_u + C(t)] - X_b\} * e^{-(t-t_1)/[Tb - k * C(t)]} \tag{1a}$$

$$X(t) = [X_l + C(t)] - \{X_d - [X_l + C(t)]\} * e^{-(t-t_2)/[Td - k * C(t)]} \tag{1b},$$

where

$$C(t) = A * \sin(2\pi * t/\tau + \varphi_0) \tag{2}$$

is a periodic function with a period  $\tau$  assigned to 24 hours (Putilov, 1995).

The parameters of this model listed in Table S2-1 were initially derived from data on the durations of recovery sleep after 6 gradually increasing intervals of extended wakefulness (Åkerstedt & Gillberg, 1981) and on the levels of Slow-Wave Activity (SWA) calculated for 10 naps and two recovery sleep episodes (see Putilov, 1995, for more details). The simulation of these data provided possibility to express  $X$  in relative SWA units and to perform the present simulations by utilizing slightly modified initial parameters of the model (Table S2-1 and Figure S2-1A).

The estimates of sleep times (mostly as simple self-reports provided by study participants) were collected from more than 80 previously published papers (see Supplementary2\_320Samples). The participants of the reported studies represented various ages, between 0.5 and 58.4 years. Simple averaging over these 190 samples provided weekday and weekend sleep times reported in Table S2-2 and illustrated in Figure 1. Mean age obtained by averaging over ages was 17.04 years with 95% confidence interval between 15.53 and 18.55 years.

Rise- and bedtimes on weekends were included as parameters ( $t_1$  and  $t_2$ , the initial times) in the simulations. For the sake of simplicity and clarity, these sleep times were rounded off to obtained 9.1 h and 23.7 h for  $t_1$  and  $t_2$ , respectively, and 7.0 h for risetime on weekdays (see Table S2-1).

Tables S2-1 and S2-2 and Figure S2-1 illustrate a model-based prediction of sleep times from rise- and bedtime on weekends and risetime on weekdays used as initial time parameters of the model.

## 2. Tables S2-1 and S2-2

**Table S2-1.** List of parameters of the model utilized for simulation of sleep times in 190 samples.

|                                                                  | Simulated data | Initial | 190 samples |
|------------------------------------------------------------------|----------------|---------|-------------|
| Sine wave-form circadian modulation (2):                         |                |         |             |
| $A$ (circadian amplitude), relative SWA                          |                | 0.50    | 0.50        |
| $\phi_0$ (initial circadian phase), radians                      |                | 4.13    | 3.66        |
| $\tau$ (entrained circadian period), hours                       |                | 24.00   | 24.00       |
| $k$ (two fold increase of the circadian term)                    |                | 2.00    | 2.00        |
| Reverse exponential buildup and exponential decay phases (1a,b): |                |         |             |
| $SWA_l$ (lower asymptote), relative SWA                          |                | 0.70    | 0.70        |
| $SWA_b$ (lowest decay), relative SWA                             |                | 0.75    | 0.755       |
| $SWA_d$ (highest buildup), relative SWA                          |                | 2.50    | 2.75        |
| $SWA_u$ (upper asymptote), relative SWA                          |                | 4.50    | 5.00        |
| $T_d$ (decay phase constant), hours                              |                | 1.95    | 2.58        |
| $T_b$ (buildup phase constant), hours                            |                | 27.04   | 23.32       |
| Initial times for buildup (1a) and decay phases (1b):            |                |         |             |
| $t_2$ (bedtime), clock hours                                     |                | 23.00   | 23.70       |
| $t_1$ (risetime), clock hours                                    |                | 7.00    | 9.10        |
| $t_1$ (risetime for 5 weekdays), clock hours                     |                |         | 7.00        |

<sup>1</sup> Notes. Parameters of the model (Putilov, 1995) used for simulation of sleep times illustrated in Figure 1. Initial: Initial parameters were derived in Putilov (1995) by using data on sleep duration after extended wakefulness and on SWA in naps and extended sleep episodes (mean SWA=1 in baseline night episode). 190 samples: Data on sleep times were obtained by averaging over 190 samples (mean age of 17.04 years) and simulated in Putilov, Verevkin, 2018, and Putilov et al., 2019.

**Table S2-2.** Discrepancies between empirical and simulated sleep times.

| Sleep    | times       | Mean  | -95%CI | +95%CI | Simulation | Discrepancy |
|----------|-------------|-------|--------|--------|------------|-------------|
| Weekdays | Bedtime     | 22.64 | 22.46  | 22.82  | 22.64      | 0.00        |
|          | Risetime    | 6.98  | 6.90   | 7.07   | 7.00       | -0.02       |
|          | Time in bed | 8.35  | 8.17   | 8.53   | 8.36       | -0.01       |
| Weekends | Bedtime     | 23.67 | 23.47  | 23.87  | 23.66      | 0.01        |
|          | Risetime    | 9.08  | 8.94   | 9.23   | 9.18       | -0.10       |
|          | Time in bed | 9.41  | 9.27   | 9.55   | 9.52       | -0.11       |
| Shift in | Bedtime     | -1.04 | -1.13  | -0.95  | -1.03      | -0.01       |
|          | Risetime    | -2.10 | -2.25  | -1.95  | -2.18      | 0.08        |
|          | Time in bed | -1.07 | -1.18  | -0.95  | -1.16      | 0.09        |

<sup>1</sup> Notes. Discrepancies were calculated by subtracting simulated sleep times from Mean (sleep times averaged over 190 samples). CI: Confidence Interval; Time in bed: Difference between risetime and bedtime.

3. Figure S2-1

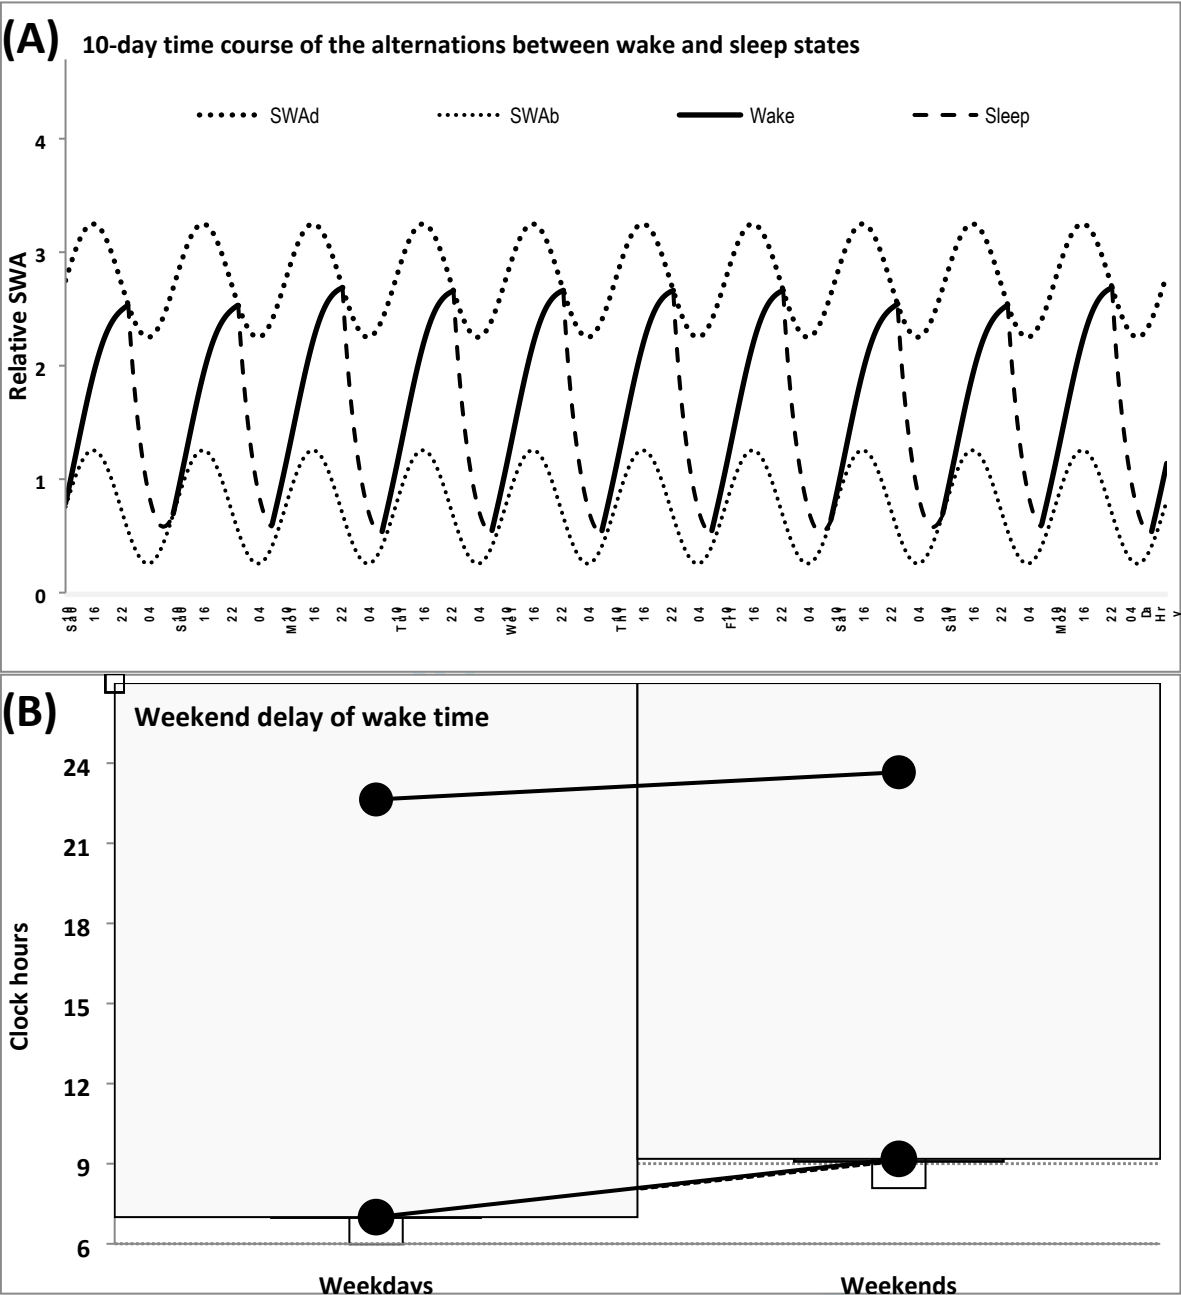

**Figure 1.** Graphical representation of the model-based simulation and simulated dataset.

A. Simulation of the sleep-wake cycle for ten consecutive days including two last free (e.g., vacation) days, Sa0 and Su0, and the following workdays (Mo1-Fr1) and weekends (Sa1 and Su1). Phases of the sleep-wake regulating process were simulated as alternations between exponential buildups and decays of SWA that are additionally modulated by sine-form function with 24-hour period (see the list of parameters in Table S2-1). SWAd and SWAb: Highest buildup and lowest decay of relative SWA, respectively; DfS: Further buildup of SWA expected in the case of Deprivation from Sleep.

B. Empirical and simulated wake and sleep times for weekdays and weekends. Rise- and bedtimes and time in bed, respectively, on weekdays and weekends. Empirical and simulated times are represented by open squares with dashed lines and closed circles with solid lines, respectively.

#### 4. References

- Åkerstedt T, Gillberg M. (1981). The circadian variation of experimentally displaced sleep. *Sleep* 4:159-69.
- Putilov A.A. The timing of sleep modelling: circadian modulation of the homeostatic process. *Biol Rhythm Res* **1995**,26:1-19.
- Putilov A.A., Verevkin E.G. Simulation of the ontogeny of social jet lag: a shift in just one of the parameters of a model of sleep-wake regulating process accounts for the delay of sleep phase across adolescence. *Frontiers in Physiology*, 05 November 2018; 2018,9:1529:1-11.
- Putilov A.A., Verevkin E.G., Donskaya O.G., Tkachenko O.N., Dorokhov V.B. Model-based simulations of weekday and weekend sleep times self-reported by larks and owls. *Biol Rhythm Res* 2019,50. Online link: <https://doi.org/10.1080/09291016.2018.1558735>.
